# Supplementary material for: Photoinduced metal-free borylation of aryl halides catalysed by an in situ formed donor–acceptor complex
Source: Royal Society of Chemistry journal article supplement (doi:10.1039/d2sc00552b), 2022-01-01

## Photoinduced Metal-Free Borylation of Aryl Halides Catalysed by *in situ* Formed Donor-Acceptor Complex

Manhong Li<sup>‡a</sup>, Siqu Liu<sup>‡b</sup>, Haoshi Bao<sup>a</sup>, Qini Li<sup>a</sup>, Yi-Hui Deng<sup>b,c</sup>, Tian-Yu Sun<sup>\*b</sup>, Leifeng Wang<sup>\*a</sup>

<sup>a</sup>School of Pharmaceutical Sciences (Shenzhen), Sun Yat-sen University, No.66, Gongchang Road, Shenzhen 518107, P. R. China.

\*E-mail: [wanglf33@mail.sysu.edu.cn](mailto:wanglf33@mail.sysu.edu.cn)

<sup>b</sup>Shenzhen Bay Laboratory, Shenzhen 518132, P. R. China.

\*E-mail: [Tian-Yu\\_Sun@pku.edu.cn](mailto:Tian-Yu_Sun@pku.edu.cn)

<sup>c</sup>Lab of Computational Chemistry and Drug Design, State Key Laboratory of Chemical Oncogenomics, Peking University Shenzhen Graduate School, Shenzhen 518055, P. R. China.

<sup>‡</sup>These authors contributed equally to this work.

### Table of Contents

|                                                                                                   |     |
|---------------------------------------------------------------------------------------------------|-----|
| 1.) General Information .....                                                                     | S2  |
| 2.) Optimization of the Reaction Conditions .....                                                 | S3  |
| 2.1 Optimization of Reaction Conditions for the Borylation of Aryl Bromides.....                  | S3  |
| 2.2 Optimization of Reaction Conditions for the Borylation of Aryl Chlorides.....                 | S5  |
| 3.) Substrate Scope and Characterization Data .....                                               | S5  |
| 3.1 Substrate Scope and Characterization Data.....                                                | S6  |
| 3.2 Reactivity of Dihaloarenes.....                                                               | S23 |
| 3.3 Reactivities Screen of Aromatic Compounds with Different Leaving Groups...                    | S24 |
| 4.) Preliminary Mechanistic Studies .....                                                         | S24 |
| 4.1 NMR Study of the B <sub>2</sub> Pin <sub>2</sub> /NEt <sub>3</sub> / Isoquinoline System..... | S24 |
| 4.2 Synthesis and Characterization of the Dimer A.....                                            | S25 |
| 4.3 X-ray Crystallographic Data of Dimer A.....                                                   | S25 |
| 4.4 The Involvement of Dimer A in the Borylation Reaction.....                                    | S36 |
| 4.5 UV-Vis Spectroscopic Study.....                                                               | S37 |
| 4.6 Fluorescence quenching experiment.....                                                        | S38 |
| 5.) Computational Data .....                                                                      | S39 |
| 6.) References .....                                                                              | S45 |
| 7.) NMR Spectroscopic Data.....                                                                   | S46 |

### 1.) General Information

**Methods and Materials:** Irradiation of photochemical reaction was carried out using Kessil PR160L-390 nm ultraviolet lamps from both side at 1–2 cm with an average intensity of 159mW/cm<sup>2</sup> (measured

from 6 cm distance). Reactions were cooled using 20W clamp fan placed on the top of the reactor. Stirring was achieved by placing the assembled reactor on IKA C-MAG HS 7 control magnetic stir bars. All reactions were performed in 2mL vials and were run under air (see the picture below for reaction setup).

Analytical TLC was performed on silica gel GF254 plates. The TLC plates were visualized by ultraviolet light ( $\lambda = 254$  nm). Organic solutions were concentrated using a rotary evaporator with a diaphragm vacuum pump purchased from EYELA. Fresh silica gel chromatography was performed using 300-400 mesh silica gel (Qingdao, China).

Proton and carbon magnetic resonance spectra ( $^1\text{H}$  NMR,  $^{13}\text{C}$  NMR and  $^{11}\text{B}$  NMR) were recorded on a Bruker AVANCE III ( $^1\text{H}$  NMR at 400 MHz,  $^{13}\text{C}$  NMR at 125 MHz,  $^{11}\text{B}$  NMR at 128 MHz) spectrometer with solvent resonance as the internal standard ( $^1\text{H}$  NMR:  $\text{CDCl}_3$  at 7.26 ppm;  $^{13}\text{C}$  NMR:  $\text{CDCl}_3$  at 77.0 ppm). NMR yield using pyrazine or hexamethyldisiloxane (HMDSO) as internal standard.  $^1\text{H}$  NMR data are reported as follows: chemical shift, multiplicity (s = singlet, d = doublet, t = triplet, dd = doublet of doublets, ddd = doublet of doublets of doublets, dddd = doublet of doublets of doublets of doublets, dt = doublet of triplets, ddt = doublet of doublets of triplets, td = triplet of doublets, tt = triplet of triplets, m = multiplet, q = quartet), coupling constants (Hz), and integration.

Commercially available reagents were purchased from Sigma-Aldrich, Adamas-beta, TCI, Bidepharm and were used as received unless otherwise noted. Super Dry solvents such as acetonitrile (AcN), dimethylformamide (DMF), toluene (PhMe), 1,2-dichloroethane (DCE) and dimethyl sulfoxide (DMSO) were purchased from Adamas-beta. Other common solvents such as petroleum ether and ethyl acetate (EtOAc) are rectification grade for fresh silica gel chromatography purchased from General-reagent.

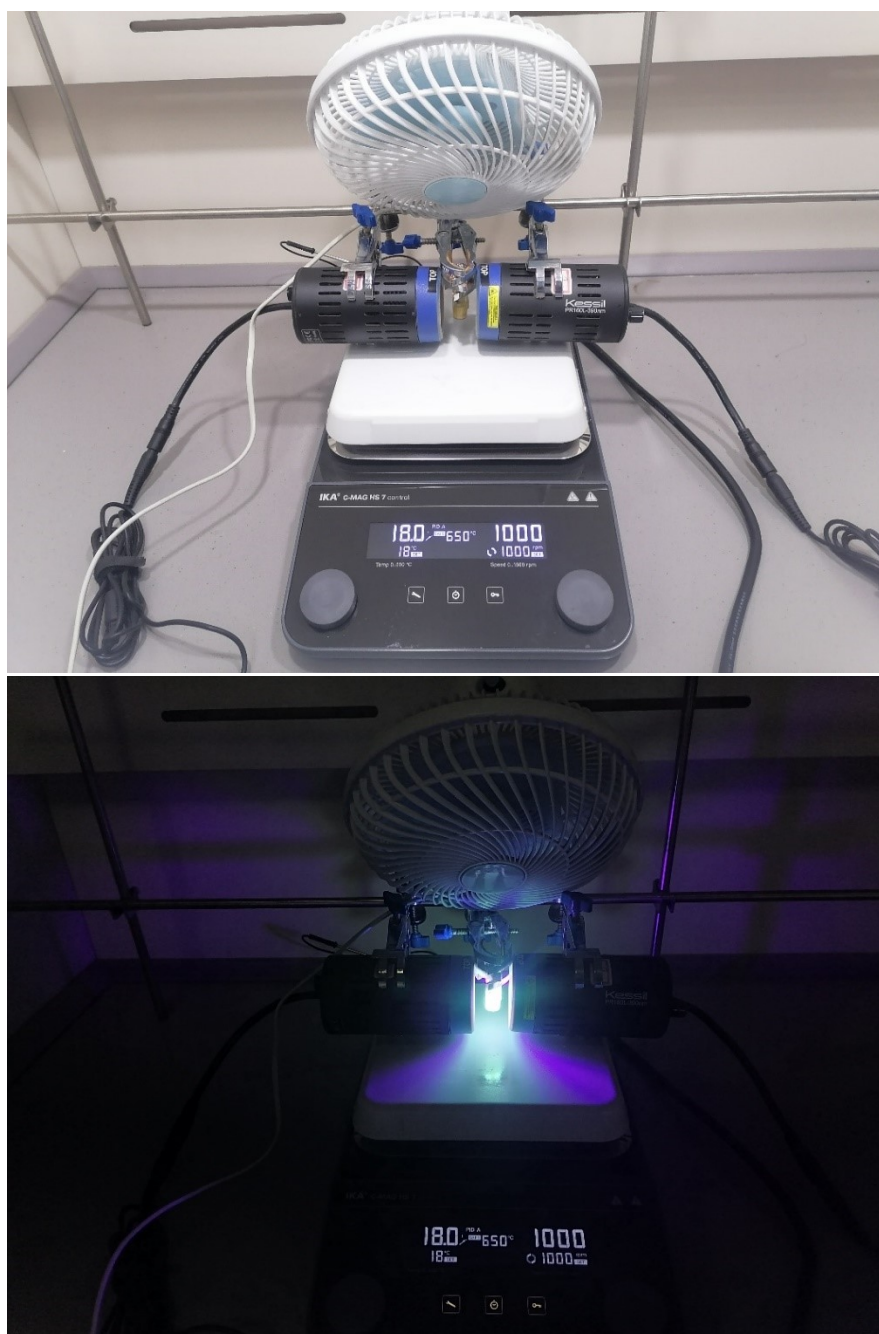

Scheme S1 Photo reaction setup

## 2.) Optimization of the Reaction Conditions

### General procedure (A):

An oven-dried 2 mL vial was charged with a magnetic stir bar, substrate,  $B_2pin_2$ , base, NCH, and solvent. The vial was sealed with a plastic cap and then irradiated with 2\*390nm LEDs light for the indicated period of time. Solvent was removed by vacuum evaporation. Yield was determined by  $^1H$  NMR using pyrazine or hexamethyldisiloxane (HMDSO) as the internal standard. The reaction mixture was purified by fresh silica gel chromatography to afford the desired borylation product.

### 2.1 Optimization of Reaction Conditions for the Borylation of Aryl Bromides

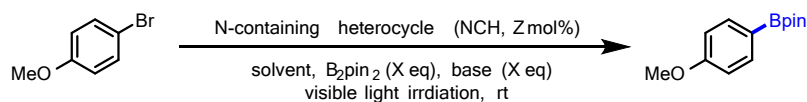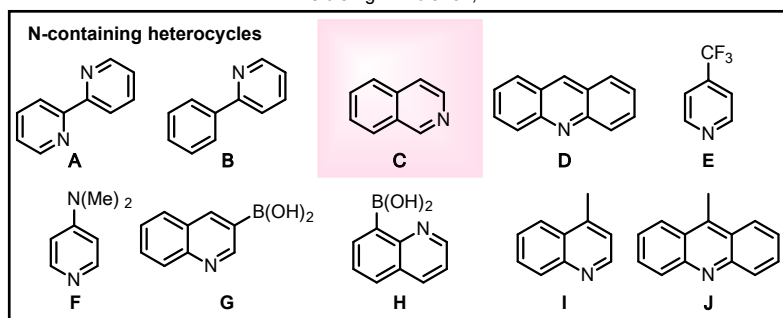

| entry | solvent        | B <sub>2</sub> pin <sub>2</sub> (X eq) | base (Y eq)                | NCH (Z mol%) | visible light | reaction time | yield (%) <sup>a</sup> |
|-------|----------------|----------------------------------------|----------------------------|--------------|---------------|---------------|------------------------|
| 1     | AcN(1.0mL)     | X = 2                                  | NEt <sub>3</sub> (3.0 eq)  | A(50mol%)    | 440nm         | 12h           | trace                  |
| 2     | AcN(1.0mL)     | X = 2                                  | NEt <sub>3</sub> (3.0 eq)  | B(50mol%)    | 456nm         | 12h           | trace                  |
| 3     | AcN(1.0mL)     | X = 2                                  | NEt <sub>3</sub> (3.0 eq)  | C(50mol%)    | 456nm         | 12h           | trace                  |
| 4     | AcN(1.0mL)     | X = 2                                  | NEt <sub>3</sub> (3.0 eq)  | C(50mol%)    | 390nm         | 12h           | 49                     |
| 5     | AcN(1.0mL)     | X = 2                                  | NEt <sub>3</sub> (3.0 eq)  | C(20mol%)    | 390nm         | 12h           | 44                     |
| 6     | AcN(0.5mL)     | X = 2                                  | NEt <sub>3</sub> (3.0 eq)  | C(20mol%)    | 390nm         | 12h           | 41                     |
| 7     | AcN(0.5mL)     | X = 2                                  | NEt <sub>3</sub> (3.0 eq)  | /            | 390nm         | 12h           | trace                  |
| 8     | AcN(0.5mL)     | X = 2                                  | NEt <sub>3</sub> (3.0 eq)  | F(20mol%)    | 390nm         | 12h           | trace                  |
| 9     | AcN(0.5mL)     | X = 2                                  | NEt <sub>3</sub> (3.0 eq)  | A(20mol%)    | 390nm         | 12h           | 27                     |
| 10    | AcN(0.5mL)     | X = 2                                  | NEt <sub>3</sub> (3.0 eq)  | B(20mol%)    | 390nm         | 12h           | trace                  |
| 11    | AcN(0.5mL)     | X = 2                                  | NEt <sub>3</sub> (3.0 eq)  | E(20mol%)    | 390nm         | 12h           | trace                  |
| 12    | DMSO(0.5mL)    | X = 2                                  | NEt <sub>3</sub> (3.0 eq)  | C(20mol%)    | 390nm         | 12h           | trace                  |
| 13    | DMF(0.5mL)     | X = 2                                  | NEt <sub>3</sub> (3.0 eq)  | C(20mol%)    | 390nm         | 12h           | NR                     |
| 14    | DCE(0.5mL)     | X = 2                                  | NEt <sub>3</sub> (3.0 eq)  | C(20mol%)    | 390nm         | 12h           | 16                     |
| 15    | toluene(0.5mL) | X = 2                                  | NEt <sub>3</sub> (3.0 eq)  | C(20mol%)    | 390nm         | 12h           | 47                     |
| 16    | AcN(0.5mL)     | X = 4                                  | NEt <sub>3</sub> (5.0 eq)  | C(20mol%)    | 390nm         | 36h           | 87(81) <sup>b</sup>    |
| 17    | AcN(0.5mL)     | X = 4                                  | NEt <sub>3</sub> (5.0 eq)  | C(20mol%)    | 390nm         | 48h           | 88                     |
| 18    | AcN(0.5mL)     | X = 2                                  | NEt <sub>3</sub> (3.0 eq)  | G(20mol%)    | 390nm         | 12h           | 13                     |
| 19    | AcN(0.5mL)     | X = 2                                  | NEt <sub>3</sub> (3.0 eq)  | H(20mol%)    | 390nm         | 12h           | 9                      |
| 20    | AcN(0.5mL)     | X = 4                                  | NEt <sub>3</sub> (5.0 eq)  | I(20mol%)    | 390nm         | 36h           | 74                     |
| 21    | AcN(0.5mL)     | X = 4                                  | NEt <sub>3</sub> (5.0 eq)  | D(20mol%)    | 390nm         | 36h           | 19                     |
| 22    | AcN(0.5mL)     | X = 4                                  | NEt <sub>3</sub> (5.0 eq)  | J(20mol%)    | 390nm         | 36h           | 60                     |
| 23    | AcN(0.5mL)     | X = 4                                  | NEt <sub>3</sub> (5.0 eq)  | /            | 390nm         | 36h           | 14                     |
| 24    | AcN(0.5mL)     | X = 4                                  | NHEt <sub>2</sub> (5.0 eq) | C(20mol%)    | 390nm         | 36h           | 53                     |
| 25    | AcN(0.5mL)     | X = 4                                  | NEt <sub>3</sub> (5.0 eq)  | C(20mol%)    | 390nm         | 24h           | 73                     |
| 26    | AcN(0.5mL)     | X = 4                                  | NEt <sub>3</sub> (5.0 eq)  | C(20mol%)    | /             | 36h           | NR                     |

[a] NMR yield. [b] Isolated yield.

**Table S1** Optimization of reaction conditions for aryl bromides

## 2.2 Optimization of Reaction Conditions for the Borylation of Aryl Chlorides

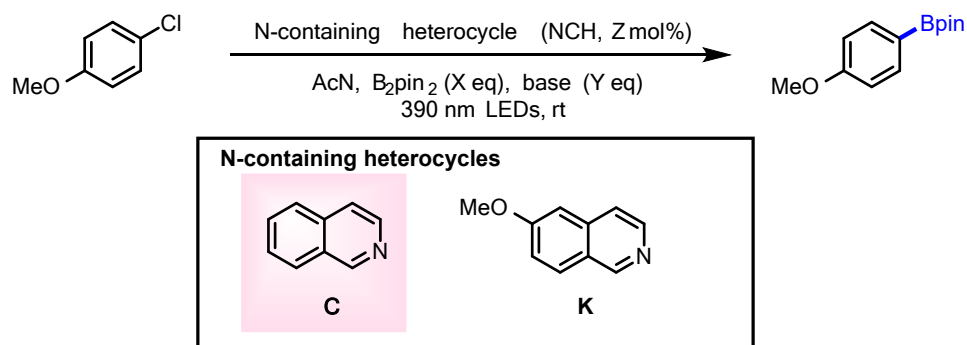

| entry | B <sub>2</sub> Pin <sub>2</sub> (X eq) | base (Y eq)                | NCH (Z mol%) | time | yield (%) <sup>a</sup> |
|-------|----------------------------------------|----------------------------|--------------|------|------------------------|
| 1     | X = 4                                  | NEt <sub>3</sub> (5.0 eq)  | C (0.2 eq)   | 36 h | 68                     |
| 2     | X = 4                                  | NEt <sub>3</sub> (5.0 eq)  | K (0.2 eq)   | 36 h | 60                     |
| 3     | X = 4                                  | NEt <sub>3</sub> (5.0 eq)  | C (0.4 eq)   | 24 h | 37                     |
| 4     | X = 4                                  | NEt <sub>3</sub> (5.0 eq)  | C (1.0 eq)   | 36 h | 70                     |
| 5     | X = 1.2                                | NEt <sub>3</sub> (3.0 eq)  | C (1.0 eq)   | 36 h | 14                     |
| 6     | X = 4                                  | Triisopentylamine (5.0 eq) | C (1.0 eq)   | 36 h | 69                     |
| 7     | X = 4                                  | Trihexylamine (5.0 eq)     | C (1.0 eq)   | 36 h | 69                     |
| 8     | X = 4                                  | NEt <sub>3</sub> (5.0 eq)  | C (2.0 eq)   | 36 h | 66                     |
| 9     | X = 2                                  | NEt <sub>3</sub> (3.0 eq)  | C (2.0 eq)   | 36 h | 23                     |
| 10    | X = 4                                  | NEt <sub>3</sub> (5.0 eq)  | C (1.0 eq)   | 72 h | 82(75) <sup>b</sup>    |

[a] NMR yield. [b] Isolated yield.

**Table S2** Optimization of reaction conditions for aryl chlorides

In summary, the optimized reaction condition for borylation of aryl bromides: substrates (0.2 mmol, 1.0 eq), B<sub>2</sub>pin<sub>2</sub> (203 mg, 0.8 mmol, 4.0 eq), isoquinoline (5.2 mg, 0.04 mmol, 20 mol%), NEt<sub>3</sub> (139 μL, 1.0 mmol, 5.0 eq), AcN (0.5 mL), under 2\*390 nm LEDs for 36 h. The optimized reaction condition for borylation of arylchlorides: substrates (0.2 mmol, 1.0 eq), B<sub>2</sub>pin<sub>2</sub> (203 mg, 0.8 mmol, 4.0 eq), isoquinoline (26 mg, 0.2 mmol, 1.0 eq), NEt<sub>3</sub>(139 μL, 1.0 mmol, 5.0 eq), AcN (0.5 mL), under 2\*390 nm LEDs for 72 h.

### 3.) Substrate Scope and Characterization Data

#### General procedure (B):

An oven-dried 2 mL vial was charged with a magnetic stir bar, aryl bromide (0.2 mmol, 1.0 eq), B<sub>2</sub>pin<sub>2</sub> (203 mg, 0.8 mmol, 4.0 eq), isoquinoline (5.2 mg, 0.04 mmol, 20 mol%), NEt<sub>3</sub> (139 μL, 1.0 mmol, 5.0 eq), AcN (0.5 mL). The vial was sealed with a plastic cap and then irradiated with 2\*390 nm LEDs light for 36 h. Solvent was removed by vacuum evaporation. NMR yield was determined by <sup>1</sup>H NMR using pyrazine or HMDSO as the internal standard. The reaction mixture was purified by fresh silica gel chromatography to afford the desired borylation product.

#### General procedure (C):

An oven-dried 2 mL vial was charged with a magnetic stir bar, aryl chloride (0.2 mmol, 1.0 eq), B<sub>2</sub>pin<sub>2</sub> (203 mg, 0.8 mmol, 4.0 eq), isoquinoline (26 mg, 0.2 mmol, 1.0 eq), NEt<sub>3</sub> (139 μL, 1.0 mmol, 5.0 eq), AcN (0.5 mL). The vial was sealed with a plastic cap and then irradiated with 2\*390 nm LEDs light for 72 h. Solvent was removed by vacuum evaporation. NMR yield was determined by <sup>1</sup>H NMR using pyrazine or HMDSO as the internal standard. The reaction mixture was purified by fresh silica gel chromatography to afford the desired borylation product.

#### General procedure (D):

An oven-dried 2 mL vial was charged with a magnetic stir bar, 4-bromoanisole (37 mg, 0.2 mmol, 1.0 eq), diboron (0.8 mmol, 4.0 eq), isoquinoline (5.2 mg, 0.04 mmol, 20 mol%), NEt<sub>3</sub> (139 μL, 1.0 mmol, 5.0 eq), AcN (0.5 mL). The vial was sealed with a plastic cap and then irradiated with 2\*390nm LED light for 36 h. Solvent was removed by vacuum evaporation. NMR yield was determined by <sup>1</sup>H NMR using pyrazine as the internal standard. The reaction mixture was purified by fresh silica gel column chromatography to afford the desired borylation product.

#### General procedure (E):

An oven-dried 2 mL vial was charged with a magnetic stir bar, simple arenes (0.2 mmol), AcN (0.5 ml), N-Bromosuccinimide (NBS, 37.4mg, 0.21 mmol, 1.05 eq). The mixture was allowed to stir for 12 h, then B<sub>2</sub>pin<sub>2</sub> (0.8 mmol, 4.0 eq), isoquinoline (5.2 mg, 0.04 mmol, 20 mol%), NEt<sub>3</sub> (139 μL, 1.0 mmol, 5.0 eq) were added without further purification. The vial was sealed with a plastic cap and then irradiated with 2\*390 nm LEDs light for 36 h. Solvent was removed by vacuum evaporation. NMR yield was determined by <sup>1</sup>H NMR using pyrazine or HMDSO as the internal standard. The reaction mixture was purified by fresh silica gel chromatography to afford the desired borylation product.

### 3.1 Substrate Scope and Characterization Data

#### 2-(4-methoxyphenyl)-4,4,5,5-tetramethyl-1,3,2-dioxaborolane (**3a**)

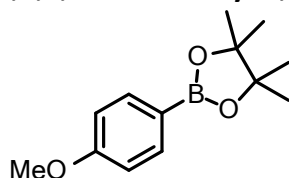

Following general procedure (B), **3a** was obtained as colourless liquid in 87% NMR yield and 81% isolated yield from 4-bromoanisole using 40:1 petroleum ether/EtOAc as eluent. Following general procedure (C), **11a** was obtained in 83% NMR yield and 75% isolated yield from 4-chloroanisole using 40:1 petroleum ether/EtOAc as eluent. Following general procedure (E), **13a** was obtained in 76% NMR yield and 73% isolated yield from anisole using 40:1 petroleum ether/EtOAc as eluent.

<sup>1</sup>H NMR (400 MHz, CDCl<sub>3</sub>) δ 7.76 (d, J = 8.4 Hz, 2H), 6.90 (d, J = 8.6 Hz, 2H), 3.83 (s, 3H), 1.33 (s, 12H). <sup>13</sup>C NMR (151 MHz, CDCl<sub>3</sub>) δ 162.28, 136.64, 113.44, 83.67, 55.21, 24.99. <sup>11</sup>B NMR (128 MHz, CDCl<sub>3</sub>) δ 31.08. The NMR data were in consistent with the reported data.<sup>[1]</sup>

#### 2-(4-methylphenyl)-4,4,5,5-tetramethyl-1,3,2-dioxaborolane (**3b**)

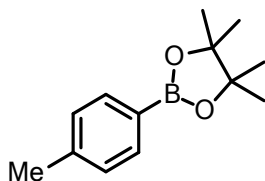

Following general procedure (B), **3b** was obtained as colourless liquid in 90% NMR yield and 51% isolated yield from 4-bromotoluene using 60:1 petroleum ether/EtOAc as eluent. Following general procedure (C), **11c** was obtained in 82% NMR yield and 76% isolated yield from 4-chlorotoluene using 60:1 petroleum ether/EtOAc as eluent.

$^1\text{H NMR}$  (400 MHz,  $\text{CDCl}_3$ )  $\delta$  7.72 (d,  $J = 7.5$  Hz, 2H), 7.20 (d,  $J = 7.5$  Hz, 2H), 2.38 (s, 3H), 1.35 (s, 12H).  $^{13}\text{C NMR}$  (151 MHz,  $\text{CDCl}_3$ )  $\delta$  141.53, 134.95, 128.66, 83.76, 25.00, 21.86.  $^{11}\text{B NMR}$  (193 MHz,  $\text{CDCl}_3$ )  $\delta$  30.97. The NMR data were in consistent with the reported data.<sup>[1]</sup>

### 2-(4-(*tert*-butyl) phenyl)-4,4,5,5-tetramethyl-1,3,2-dioxaborolane (3c)

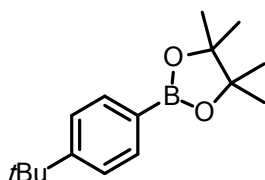

Following general procedure (B), **3c** was obtained as colourless solid in 74% isolated yield from 1-*tert*-butyl-4-bromobenzene using 60:1 petroleum ether/EtOAc as eluent. Following general procedure (C), **11d** was obtained in 66% isolated yield from 1-*tert*-butyl-4-chlorobenzene using 60:1 petroleum ether/EtOAc as eluent.

$^1\text{H NMR}$  (400 MHz,  $\text{CDCl}_3$ )  $\delta$  7.78 (d,  $J = 8.2$  Hz, 2H), 7.42 (d,  $J = 8.2$  Hz, 2H), 1.35 (s, 12H), 1.34 (s, 9H).  $^{13}\text{C NMR}$  (151 MHz,  $\text{CDCl}_3$ )  $\delta$  154.60, 134.80, 124.81, 83.72, 35.00, 31.31, 24.95.  $^{11}\text{B NMR}$  (128 MHz,  $\text{CDCl}_3$ )  $\delta$  30.89. The NMR data were in consistent with the reported data.<sup>[1]</sup>

### N, N-dimethyl-4-(4,4,5,5-tetramethyl-1,3,2-dioxaborolan-2-yl) aniline (3d)

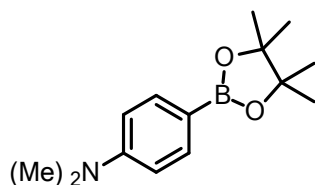

Following general procedure (B), **3d** was obtained as white solid in 79% NMR yield and 50% isolated yield from N, N-dimethyl-*p*-bromoaniline using 60:1 petroleum ether/EtOAc as eluent.

$^1\text{H NMR}$  (400 MHz,  $\text{CDCl}_3$ )  $\delta$  7.69 (d,  $J = 8.2$  Hz, 2H), 6.70 (d,  $J = 8.2$  Hz, 2H), 2.99 (s, 6H), 1.32 (s, 12H).  $^{13}\text{C NMR}$  (151 MHz,  $\text{CDCl}_3$ )  $\delta$  152.66, 136.27, 111.38, 83.28, 40.24, 24.97.  $^{11}\text{B NMR}$  (128 MHz,  $\text{CDCl}_3$ )  $\delta$  31.39. The NMR data were in consistent with the reported data.<sup>[2]</sup>

### 4,4,5,5-tetramethyl-2-(4-(methylthio) phenyl)-1,3,2-dioxaborolane (3e)

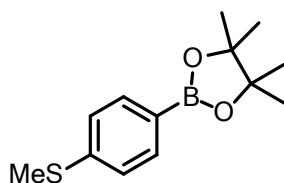

Following general procedure (B), **3e** was obtained as colourless solid in 62% NMR yield and 64% isolated yield from 4-bromothioanisole using 60:1 petroleum ether/EtOAc as eluent. Following general procedure (C), **11g** was obtained in 69% NMR yield and 64% isolated yield from 4-chlorothioanisole using 60:1 petroleum ether/EtOAc as eluent.

$^1\text{H NMR}$  (400 MHz,  $\text{CDCl}_3$ )  $\delta$  7.71 (d,  $J = 6.9$  Hz, 2H), 7.23 (d,  $J = 7.5$  Hz, 2H), 2.49 (s, 3H), 1.34 (s, 12H).  $^{13}\text{C NMR}$  (151 MHz,  $\text{CDCl}_3$ )  $\delta$  142.69, 135.19, 125.11, 83.84, 24.97, 15.16.  $^{11}\text{B NMR}$  (128 MHz,  $\text{CDCl}_3$ )  $\delta$  30.81. The NMR data were in consistent with the reported data.<sup>[1]</sup>

#### 4,4,5,5-tetramethyl-2-(4-phenoxyphenyl)-1,3,2-dioxaborolane (3f)

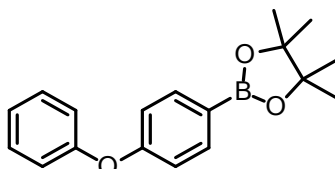

Following general procedure (B), **3f** was obtained as white solid in 59% isolated yield from 4-bromodiphenyl ether using 40:1 petroleum ether/EtOAc as eluent. Following general procedure (E), **13b** was obtained in 52% NMR yield and 38% isolated yield from diphenyl ether using 40:1 petroleum ether/EtOAc as eluent.

$^1\text{H NMR}$  (400 MHz,  $\text{CDCl}_3$ )  $\delta$  7.79 (d,  $J = 8.5$  Hz, 2H), 7.35 (t,  $J = 7.9$  Hz, 2H), 7.13 (t,  $J = 7.4$  Hz, 1H), 7.04 (d,  $J = 8.1$  Hz, 2H), 6.99 (d,  $J = 8.5$  Hz, 2H), 1.35 (s, 12H).  $^{13}\text{C NMR}$  (101 MHz,  $\text{CDCl}_3$ )  $\delta$  160.33, 156.68, 136.77, 129.94, 123.80, 119.61, 117.81, 83.87, 25.00 (signal for the carbon that is attached to the boron atom was not observed).  $^{11}\text{B NMR}$  (128 MHz,  $\text{CDCl}_3$ )  $\delta$  32.20. The NMR data were in consistent with the reported data.<sup>[3]</sup>

#### 4,4,5,5-tetramethyl-2-phenyl-1,3,2-dioxaborolane (3g)

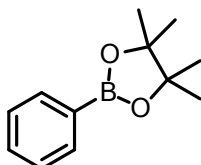

Following general procedure (B), **3g** was obtained as colourless oil in 94% NMR yield and 58% isolated yield from bromobenzene using 60:1 petroleum ether/EtOAc as eluent. Following general procedure (C), **11b** was obtained in 59% NMR yield and 54% isolated yield from chlorobenzene using 60:1 petroleum ether/EtOAc as eluent.

$^1\text{H NMR}$  (400 MHz,  $\text{CDCl}_3$ )  $\delta$  7.83 (d,  $J = 7.3$  Hz, 2H), 7.47 (t,  $J = 7.3$  Hz, 1H), 7.38 (t,  $J = 7.3$  Hz, 2H), 1.36 (s, 12H).  $^{13}\text{C NMR}$  (151 MHz,  $\text{CDCl}_3$ )  $\delta$  134.86, 131.38, 127.83, 83.89, 24.99.  $^{11}\text{B NMR}$  (193 MHz,  $\text{CDCl}_3$ )  $\delta$  31.03. The NMR data were in consistent with the reported data.<sup>[1]</sup>

#### 4-(4,4,5,5-tetramethyl-1,3,2-dioxaborolan-2-yl) phenol (3h)

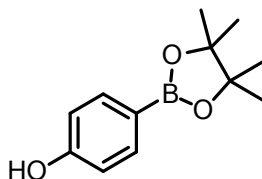



Following general procedure (B), **3h** was obtained as white solid in 65% NMR yield and 61% isolated yield from 4-bromophenol using 10:1 petroleum ether/EtOAc as eluent. Following general procedure (C), **11e** was obtained in 45% NMR yield and 44% isolated yield from 4-chlorophenol using 10:1 petroleum ether/EtOAc as eluent. Following general procedure (E), **13e** was obtained in 36% NMR yield and 33% isolated yield from phenol using 10:1 petroleum ether/EtOAc as eluent.

$^1\text{H NMR}$  (400 MHz,  $\text{CDCl}_3$ )  $\delta$  7.70 (d,  $J = 8.4$  Hz, 2H), 6.83 (d,  $J = 8.5$  Hz, 12H), 5.72 (s, 1H), 1.34 (s, 12H).  $^{13}\text{C NMR}$  (151 MHz,  $\text{CDCl}_3$ )  $\delta$  158.74, 136.89, 115.01, 83.81, 24.95.  $^{11}\text{B NMR}$  (128 MHz,  $\text{CDCl}_3$ )  $\delta$  30.80. The NMR data were in consistent with the reported data.<sup>[2]</sup>

#### 4-(4,4,5,5-tetramethyl-1,3,2-dioxaborolan-2-yl) aniline (**3i**)

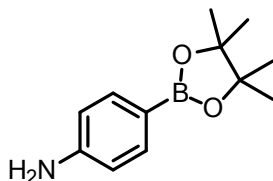

Following general procedure (B), **3i** was obtained as colourless solid in 86% NMR yield and 77% isolated yield from 4-bromoaniline using 10:1 petroleum ether/EtOAc as eluent. Following general procedure (C), **11f** was obtained in 44% NMR yield and 42% isolated yield from 4-chloroaniline using 10:1 petroleum ether/EtOAc as eluent. Following general procedure (E), **13f** was obtained in 58% NMR yield and 39% isolated yield from aniline using 10:1 petroleum ether/EtOAc as eluent.

$^1\text{H NMR}$  (400 MHz,  $\text{CDCl}_3$ )  $\delta$  7.62 (d,  $J = 7.9$  Hz, 2H), 6.66 (d,  $J = 7.9$  Hz, 2H), 3.73 (brs, 2H), 1.32 (s, 12H).  $^{13}\text{C NMR}$  (101 MHz,  $\text{CDCl}_3$ )  $\delta$  149.41, 136.53, 114.21, 83.42, 24.97.  $^{11}\text{B NMR}$  (128 MHz,  $\text{CDCl}_3$ )  $\delta$  30.86. The NMR data were in consistent with the reported data.<sup>[1]</sup>

#### 2-(4-fluorophenyl)-4,4,5,5-tetramethyl-1,3,2-dioxaborolane (**3j**)

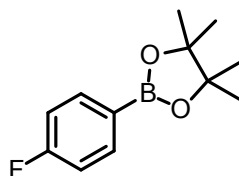

Following general procedure (B), **3j** was obtained as colourless oil in 80% NMR yield and 69% isolated yield from 4-bromofluorobenzene using 40:1 petroleum ether/EtOAc as eluent. Following general procedure (C), **11h** was obtained in 75% NMR yield and 70% isolated yield from 4-chlorofluorobenzene using 40:1 petroleum ether/EtOAc as eluent.

$^1\text{H NMR}$  (400 MHz,  $\text{CDCl}_3$ )  $\delta$  7.80 (dd,  $J = 8.4, 6.3$  Hz, 2H), 7.05 (t,  $J = 8.8$  Hz, 2H), 1.34 (s, 12H).  $^{13}\text{C NMR}$  (151 MHz,  $\text{CDCl}_3$ )  $\delta$  165.24 (d,  $J = 250.5$  Hz), 137.12 (d,  $J = 8.2$  Hz), 114.98 (d,  $J = 20.2$  Hz), 84.04, 24.99.  $^{11}\text{B NMR}$  (128 MHz,  $\text{CDCl}_3$ )  $\delta$  30.66.  $^{19}\text{F NMR}$  (377 MHz,  $\text{CDCl}_3$ )  $\delta$  -108.38 (tt,  $J = 9.0, 6.0$  Hz). The NMR data were in consistent with the reported data.<sup>[1]</sup>

#### 4,4,5,5-tetramethyl-2-(4-(trifluoromethyl) phenyl)-1,3,2-dioxaborolane (**3k**)

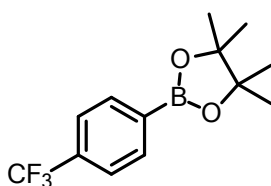

Following general procedure (B), **3k** was obtained as colourless solid in 59% NMR yield and 52% isolated yield from 4-bromobenzotrifluoride using 60:1 petroleum ether/EtOAc as eluent.

$^1\text{H NMR}$  (400 MHz,  $\text{CDCl}_3$ )  $\delta$  7.91 (d,  $J = 7.8$  Hz, 2H), 7.61 (d,  $J = 7.7$  Hz, 2H), 1.36 (s, 12H).  $^{13}\text{C NMR}$  (151 MHz,  $\text{CDCl}_3$ )  $\delta$  135.15, 133.09, 124.48, 124.46, 84.42, 25.01.  $^{11}\text{B NMR}$  (128 MHz,  $\text{CDCl}_3$ )  $\delta$  30.61.  $^{19}\text{F NMR}$  (377 MHz,  $\text{CDCl}_3$ )  $\delta$  -63.00. The NMR data were in consistent with the reported data.<sup>[1]</sup>

### 2-(4-(difluoromethoxy) phenyl)-4,4,5,5-tetramethyl-1,3,2-dioxaborolane (3l)

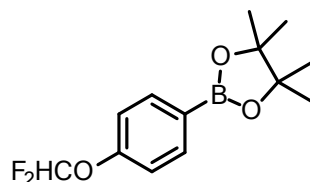

Following general procedure (B), **3l** was obtained as colourless oil in 46% isolated yield from 1-bromo-4-(difluoromethyl) benzene using 60:1 petroleum ether/EtOAc as eluent.

$^1\text{H NMR}$  (400 MHz,  $\text{CDCl}_3$ )  $\delta$  7.81 (d,  $J = 7.4$  Hz, 2H), 7.09 (d,  $J = 8.0$  Hz, 2H), 6.54 (t,  $J = 73.9$  Hz, 1H), 1.34 (s, 12H).  $^{13}\text{C NMR}$  (151 MHz,  $\text{CDCl}_3$ )  $\delta$  153.91, 136.78, 118.34, 115.89 (t,  $J = 259.4$  Hz), 84.10, 24.98.  $^{11}\text{B NMR}$  (128 MHz,  $\text{CDCl}_3$ )  $\delta$  30.91.  $^{19}\text{F NMR}$  (377 MHz,  $\text{CDCl}_3$ )  $\delta$  -80.91 (d,  $J = 74.2$  Hz). The NMR data were in consistent with the reported data.<sup>[1]</sup>

### 4-(4,4,5,5-tetramethyl-1,3,2-dioxaborolan-2-yl) benzonitrile (3m)

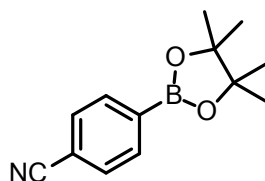

Following general procedure (B), **3m** was obtained as colourless solid in 49% NMR yield and 34% isolated yield from 4-bromobenzonitrile using 40:1 petroleum ether/EtOAc as eluent.

$^1\text{H NMR}$  (400 MHz,  $\text{CDCl}_3$ )  $\delta$  7.88 (d,  $J = 8.1$  Hz, 2H), 7.64 (d,  $J = 8.2$  Hz, 2H), 1.35 (s, 12H).  $^{11}\text{B NMR}$  (193 MHz,  $\text{CDCl}_3$ )  $\delta$  30.49. The NMR data were in consistent with the reported data.<sup>[1]</sup>

### phenyl 4-(4,4,5,5-tetramethyl-1,3,2-dioxaborolan-2-yl) benzoate (3n)

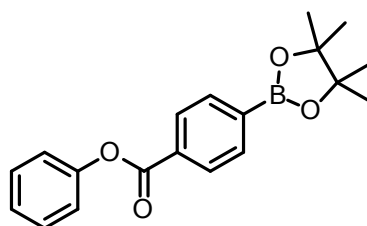

4-bromophenyl benzoate was synthesized according to the literature precedent:<sup>[4]</sup> Benzoic acid (2.00 g, 16.38 mmol, 1.0 eq) was dissolved in dry  $\text{CH}_2\text{Cl}_2$  (100 mL) under  $\text{N}_2$  atmosphere and phenol (1.54 g, 16.38 mmol, 1.0 eq), DCC (5.07 g, 24.55 mmol, 1.5 eq), DMAP (0.40 g, 8.19 mmol, 0.5 eq) were slowly added and stirred for 8 h at rt. The reaction was quenched by adding water and extracted with  $\text{CH}_2\text{Cl}_2$  (3\*80 ml). The organic layer was washed with water and brine, dried over  $\text{MgSO}_4$ , removed by filtration. The filtrate was concentrated in vacuo and chromatographed on silica gel to give a white solid. Analytical data matched that reported in the literature.<sup>[4]</sup>  $^1\text{H NMR}$  (400 MHz,  $\text{CDCl}_3$ )  $\delta$  8.06 (d,  $J = 8.2$  Hz, 2H), 7.65 (d,  $J = 8.2$  Hz, 2H), 7.43 (t,  $J = 7.7$  Hz, 2H), 7.32 – 7.25 (m, 1H), 7.20 (d,  $J = 8.0$  Hz, 2H).

Following general procedure (B), **3n** was obtained as white solid in 76% isolated yield from 4-bromophenyl benzoate using 50:1 petroleum ether/EtOAc as eluent.

$^1\text{H NMR}$  (400 MHz,  $\text{CDCl}_3$ )  $\delta$  8.19 (d,  $J = 8.1$  Hz, 2H), 7.95 (d,  $J = 8.0$  Hz, 2H), 7.44 (t,  $J = 7.7$  Hz, 2H), 7.28 (t,  $J = 7.0$  Hz, 1H), 7.23 (d,  $J = 7.7$  Hz, 2H), 1.38 (s, 12H). The NMR data were in consistent with the reported data.<sup>[5]</sup>

### methyl 4-(4,4,5,5-tetramethyl-1,3,2-dioxaborolan-2-yl) benzoate (**3o**)

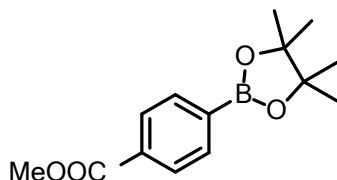

Following general procedure (B), **3o** was obtained as colourless liquid in 58% NMR yield and 55% isolated yield from methyl 4-bromobenzoate using 40:1 petroleum ether/EtOAc as eluent.

$^1\text{H NMR}$  (400 MHz,  $\text{CDCl}_3$ )  $\delta$  8.02 (d,  $J = 7.9$  Hz, 2H), 7.87 (d,  $J = 7.6$  Hz, 2H), 3.92 (s, 3H), 1.35 (s, 12H).  $^{13}\text{C NMR}$  (151 MHz,  $\text{CDCl}_3$ )  $\delta$  167.29, 134.80, 132.43, 128.73, 84.32, 52.29, 25.01.  $^{11}\text{B NMR}$  (128 MHz,  $\text{CDCl}_3$ )  $\delta$  30.94. The NMR data were in consistent with the reported data.<sup>[1]</sup>

### 2-(4-(allyloxy) phenyl)-4,4,5,5-tetramethyl-1,3,2-dioxaborolane (**3p**)

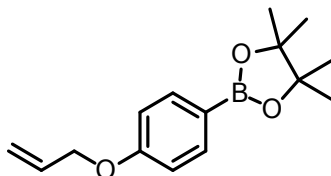

1-(allyloxy)-4-bromobenzene was synthesized according to the literature precedent:<sup>[6]</sup> To a solution of 4-bromophenol (0.8 g, 4.62 mmol, 1.0 eq) in DMF (25 mL) were added potassium carbonate (1.28 g, 9.24 mmol, 2.0 eq) and allyl bromide at room temperature. The mixture was stirred for 24 h, poured into water, and then extracted with  $\text{Et}_2\text{O}$ . The extract was washed with brine, dried over  $\text{MgSO}_4$ , and concentrated using a rotary evaporator. The yellow oil thus obtained and was distilled under reduced pressure to give as colourless oil. Analytical data matched that reported in the literature.<sup>[6]</sup>  $^1\text{H NMR}$  (400 MHz,  $\text{CDCl}_3$ )  $\delta$  7.37 (d,  $J = 8.9$  Hz, 2H), 6.80 (d,  $J = 9.0$  Hz, 2H), 6.03 (ddd,  $J = 22.6, 10.5, 5.3$  Hz, 1H), 5.40 (dq,  $J = 17.2, 1.6$  Hz, 1H), 5.30 (dq,  $J = 10.5, 1.4$  Hz, 1H), 4.51 (dt,  $J = 5.3, 1.6$  Hz, 2H).

Following general procedure (B), **3p** was obtained as colourless liquid in 57% NMR yield and 52% isolated yield from 1-(allyloxy)-4-bromobenzene using 60:1 petroleum ether/EtOAc as eluent.

$^1\text{H NMR}$  (400 MHz,  $\text{CDCl}_3$ )  $\delta$  7.75 (d,  $J = 8.6$  Hz, 2H), 6.91 (d,  $J = 8.6$  Hz, 2H), 6.05 (ddt,  $J = 17.3, 10.5, 5.2$  Hz, 1H), 5.41 (dd,  $J = 17.3, 1.7$  Hz, 1H), 5.28 (dd,  $J = 10.5, 1.5$  Hz, 1H), 4.56 (d,  $J = 5.3$  Hz, 2H), 1.33 (s, 12H). The NMR data were in consistent with the reported data.<sup>[7]</sup>

### 1,4-bis(4,4,5,5-tetramethyl-1,3,2-dioxaborolan-2-yl) benzene(**3q**)

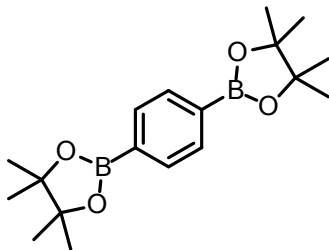

Following general procedure (B), **3q** was obtained as colourless oil in 54% isolated yield from 1-bromo-4-(4,4,5,5-tetramethyl-1,3,2-dioxaborolan-2-yl)benzene using 60:1 petroleum ether/EtOAc as eluent.

$^1\text{H NMR}$  (600 MHz,  $\text{CDCl}_3$ )  $\delta$  7.80 (s, 4H), 1.35 (s, 24H). The NMR data were in consistent with the reported data.<sup>[1]</sup>

### 2-(3-methylphenyl)-4,4,5,5-tetramethyl-1,3,2-dioxaborolane (3r)

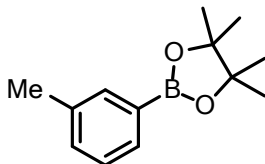

Following general procedure (B), **3r** was obtained as colourless liquid in 80% NMR yield and 57% isolated yield from 3-methyl-1-bromobenzene using 60:1 petroleum ether/EtOAc as eluent. Following procedure (C), **11i** was obtained in 60% NMR yield and 49% isolated yield from 3-methyl-1-chlorobenzene using 60:1 petroleum ether/EtOAc as eluent.

$^1\text{H NMR}$  (400 MHz,  $\text{CDCl}_3$ )  $\delta$  7.64 (s, 1H), 7.62 – 7.60 (m, 1H), 7.28 – 7.26 (m, 2H), 2.35 (s, 3H), 1.35 (s, 12H). The NMR data were in consistent with the reported data.<sup>[1]</sup>

### 3-(4,4,5,5-tetramethyl-1,3,2-dioxaborolan-2-yl) aniline (3s)

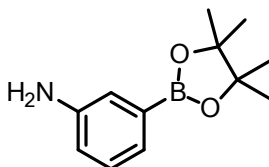

Following general procedure (B), **3s** was obtained as colourless solid in 74% NMR yield and 82% isolated yield from 3-bromoaniline using 10:1 petroleum ether/EtOAc as eluent. Following general procedure (C), **11j** was obtained in 71% NMR yield and 73% isolated yield from 3-chloroaniline using 10:1 petroleum ether/EtOAc as eluent.

$^1\text{H NMR}$  (400 MHz,  $\text{CDCl}_3$ )  $\delta$  7.21 (d,  $J = 7.0$  Hz, 1H), 7.18 (d,  $J = 7.5$  Hz, 1H), 7.14 (s, 1H), 6.79 (d,  $J = 7.1$  Hz, 1H), 3.51 (brs, 2H), 1.34 (s, 12H). The NMR data were in consistent with the reported data.<sup>[1]</sup>

### 2-(3-fluorophenyl)-4,4,5,5-tetramethyl-1,3,2-dioxaborolane (3t)

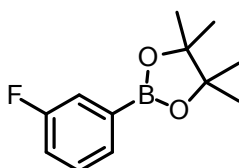

Following general procedure (B), **3t** was obtained as colourless oil in 89% NMR yield and 44% isolated yield from 3-bromofluorobenzene using 60:1 petroleum ether/EtOAc as eluent.

$^1\text{H NMR}$  (400 MHz,  $\text{CDCl}_3$ )  $\delta$  7.58 (s, 1H), 7.48 (d,  $J = 9.5$  Hz, 2H), 7.38 – 7.30 (m, 1H), 7.15 (d,  $J = 8.8$  Hz, 1H), 1.35 (s, 12H).  $^{13}\text{C NMR}$  (151 MHz,  $\text{CDCl}_3$ )  $\delta$  162.63 (d,  $J = 246.4$  Hz), 130.41 (d,  $J = 3.1$  Hz), 129.60 (d,  $J = 7.1$  Hz), 121.09 (d,  $J = 19.3$  Hz), 118.31 (d,  $J = 21.1$  Hz), 84.22, 24.98.  $^{11}\text{B NMR}$  (128 MHz,  $\text{CDCl}_3$ )  $\delta$  30.56.  $^{19}\text{F NMR}$  (377 MHz,  $\text{CDCl}_3$ )  $\delta$  -114.17 (td,  $J = 9.0, 5.5$  Hz). The NMR data were in consistent with the reported data.<sup>[1]</sup>

### 2-(2-methylphenyl)-4,4,5,5-tetramethyl-1,3,2-dioxaborolane (**3u**)

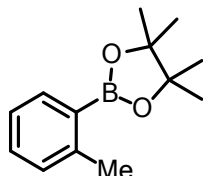

Following general procedure (B), **3u** was obtained as colourless liquid in 85% NMR yield and 59% isolated yield from 2-methyl-1-bromobenzene using 60:1 petroleum ether/EtOAc as eluent. Following procedure (C), **11k** was obtained in 69% NMR yield and 46% isolated yield from 2-methyl-1-chlorobenzene using 60:1 petroleum ether/EtOAc as eluent.

$^1\text{H NMR}$  (400 MHz,  $\text{CDCl}_3$ )  $\delta$  7.78 (d,  $J = 8.4$  Hz, 1H), 7.33 (d,  $J = 8.3$  Hz, 1H), 7.18 (s, 2H), 2.57 (d,  $J = 9.5$  Hz, 3H), 1.36 (d,  $J = 9.7$  Hz, 12H). The NMR data were in consistent with the reported data.<sup>[1]</sup>

### 2-(4,4,5,5-tetramethyl-1,3,2-dioxaborolan-2-yl) aniline (**3v**)

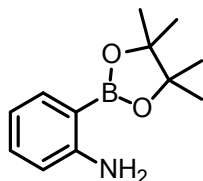

Following general procedure (B), **3v** was obtained as colourless solid in 90% NMR yield and 82% isolated yield from 2-bromoaniline using 15:1 petroleum ether/EtOAc as eluent. Following general procedure (C), **11l** was obtained in 72% NMR yield and 76% isolated yield from 2-chloroaniline using 15:1 petroleum ether/EtOAc as eluent.

$^1\text{H NMR}$  (400 MHz,  $\text{CDCl}_3$ )  $\delta$  7.61 (d,  $J = 7.4$  Hz, 1H), 7.22 (t,  $J = 7.6$  Hz, 1H), 6.68 (t,  $J = 7.3$  Hz, 1H), 6.60 (d,  $J = 8.1$  Hz, 1H), 4.23 (brs, 2H), 1.34 (s, 12H).  $^{13}\text{C NMR}$  (151 MHz,  $\text{CDCl}_3$ )  $\delta$  153.73, 136.92, 132.87, 117.04, 114.91, 83.64, 25.05.  $^{11}\text{B NMR}$  (193 MHz,  $\text{CDCl}_3$ )  $\delta$  31.12. The NMR data were in consistent with the reported data.<sup>[2]</sup>

### 4,4,5,5-Tetramethyl-2-[2-(2-propen-1-yl) phenyl]-1,3,2-dioxaborolane(**3w**)

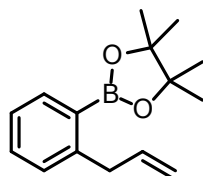

Following general procedure (B), **3w** was obtained as colourless liquid in 75% NMR yield and 63% isolated yield from 2-bromo-1-allylbenzene using 85:1 petroleum ether/EtOAc as eluent.

$^1\text{H NMR}$  (600 MHz,  $\text{CDCl}_3$ )  $\delta$  7.81 – 7.77 (m, 1H), 7.37 (td,  $J = 7.5, 1.6$  Hz, 1H), 7.20 (dt,  $J = 7.4, 3.3$  Hz, 2H), 6.00 (ddt,  $J = 16.8, 10.0, 6.6$  Hz, 1H), 5.05 – 4.96 (m, 2H), 3.70 (d,  $J = 6.6$  Hz, 2H), 1.34 (s,

12H).  $^{13}\text{C}$  NMR (151 MHz,  $\text{CDCl}_3$ )  $\delta$  146.92, 139.34, 136.21, 131.17, 129.32, 125.45, 114.86, 83.62, 39.94, 25.02.  $^{11}\text{B}$  NMR (193 MHz,  $\text{CDCl}_3$ )  $\delta$  31.35. The NMR data were in consistent with the reported data.<sup>[8]</sup>

### 2-(2,5-dimethylphenyl)-4,4,5,5-tetramethyl-1,3,2-dioxaborolane (**3x**)

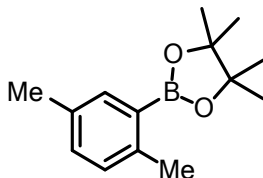

Following general procedure (**B**), **3x** was obtained as colourless liquid in 77% NMR yield and 67% isolated yield from 2,5-dimethylbromobenzene using 60:1 petroleum ether/EtOAc as eluent.

$^1\text{H}$  NMR (400 MHz,  $\text{CDCl}_3$ )  $\delta$  7.58 (s, 1H), 7.13 (d,  $J = 7.8$  Hz, 1H), 7.07 (d,  $J = 7.8$  Hz, 1H), 2.50 (s, 3H), 2.31 (s, 3H), 1.35 (s, 12H).  $^{13}\text{C}$  NMR (151 MHz,  $\text{CDCl}_3$ )  $\delta$  141.84, 136.49, 134.03, 131.69, 129.92, 83.47, 25.01, 21.83, 20.92.  $^{11}\text{B}$  NMR (128 MHz,  $\text{CDCl}_3$ )  $\delta$  31.40. The NMR data were in consistent with the reported data.<sup>[9]</sup>

### 2-(3,4-dimethoxyphenyl)-4,4,5,5-tetramethyl-1,3,2-dioxaborolane (**3y**)

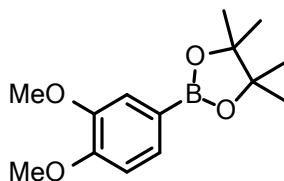

Following general procedure (**B**), **3y** was obtained as colourless solid in 72% isolated yield from 3,4-dimethoxy-1-bromobenzene using 30:1 petroleum ether/EtOAc as eluent. Following general procedure (**C**), **11m** was obtained in 87% NMR yield and 81% isolated yield from 3,4-dimethoxy-1-chlorobenzene using 30:1 petroleum ether/EtOAc as eluent. Following general procedure (**E**), **13g** was obtained in 76% NMR yield and 64% isolated yield from 1,2-dimethoxybenzene using 30:1 petroleum ether/EtOAc as eluent.

$^1\text{H}$  NMR (400 MHz,  $\text{CDCl}_3$ )  $\delta$  7.42 (d,  $J = 8.0$  Hz, 1H), 7.28 (s, 1H), 6.87 (d,  $J = 8.0$  Hz, 1H), 3.91 (s, 3H), 3.89 (s, 3H), 1.33 (s, 12H).  $^{13}\text{C}$  NMR (151 MHz,  $\text{CDCl}_3$ )  $\delta$  151.76, 148.46, 128.68, 116.70, 110.61, 83.77, 55.96, 55.85, 25.04 (d,  $J = 25.5$  Hz).  $^{11}\text{B}$  NMR (128 MHz,  $\text{CDCl}_3$ )  $\delta$  30.69. The NMR data were in consistent with the reported data.<sup>[1]</sup>

### 2-(benzo[d][1,3] dioxol-5-yl)-4,4,5,5-tetramethyl-1,3,2-dioxaborolane (**3z**)

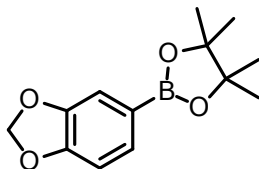

Following general procedure (**B**), **3z** was obtained as colourless liquid in 82% NMR yield and 57% isolated yield from 4-bromo-1,2-(methylenedioxy) benzene using 60:1 petroleum ether/EtOAc as eluent.

$^1\text{H}$  NMR (400 MHz,  $\text{CDCl}_3$ )  $\delta$  7.36 (d,  $J = 7.7$  Hz, 1H), 7.24 (s, 1H), 6.83 (d,  $J = 7.6$  Hz, 1H), 5.95 (s, 2H), 1.33 (s, 12H).  $^{13}\text{C}$  NMR (151 MHz,  $\text{CDCl}_3$ )  $\delta$  150.29, 147.32, 129.84, 114.06, 108.40, 100.84, 83.82, 24.95.  $^{11}\text{B}$  NMR (193 MHz,  $\text{CDCl}_3$ )  $\delta$  30.66. The NMR data were in consistent with the reported data.<sup>[1]</sup>

### 2-methyl-5-(4,4,5,5-tetramethyl-1,3,2-dioxaborolan-2-yl) aniline (**3aa**)

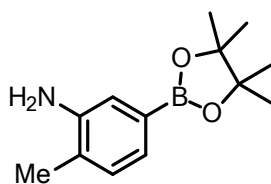

Following general procedure (**B**), **3aa** was obtained as white solid in 81% NMR yield and 69% isolated yield from 2-methyl-5-bromoaniline using 10:1 petroleum ether/EtOAc as eluent. Following general procedure (**C**), **11n** was obtained in 68% NMR yield and 63% isolated yield from 2-methyl-5-chloroaniline using 10:1 petroleum ether/EtOAc as eluent.

$^1\text{H NMR}$  (400 MHz,  $\text{CDCl}_3$ )  $\delta$  7.17 (d,  $J = 7.3$  Hz, 1H), 7.12 (s, 1H), 7.07 (d,  $J = 7.3$  Hz, 1H), 3.57 (brs, 2H), 2.19 (s, 3H), 1.33 (s, 12H). The NMR data were in consistent with the reported data.<sup>[1]</sup>

### 2-fluoro-4-(4,4,5,5-tetramethyl-1,3,2-dioxaborolan-2-yl)-phenol (**3ab**)

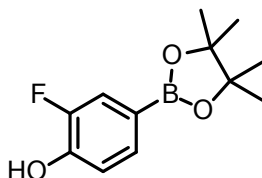

Following general procedure (**B**), **3ab** was obtained as white solid in 46% NMR yield and 45% isolated yield from 4-bromo-2-fluorophenol using 6:1 petroleum ether/EtOAc as eluent.

$^1\text{H NMR}$  (400 MHz,  $\text{CDCl}_3$ )  $\delta$  7.49 (dd,  $J = 9.5, 5.4$  Hz, 2H), 6.98 (t,  $J = 8.3$  Hz, 1H), 5.37 (s, 1H), 1.33 (s, 12H).  $^{19}\text{F NMR}$  (377 MHz,  $\text{CDCl}_3$ )  $\delta$  -141.94 (dd,  $J = 11.0, 8.4$  Hz). The NMR data were in consistent with the reported data.<sup>[10]</sup>

### 2-(3-fluoro-4-methoxyphenyl)-4,4,5,5-tetramethyl-1,3,2-dioxaborolane (**3ac**)

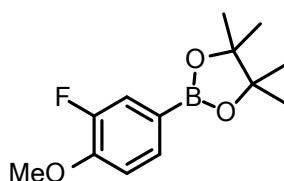

Following general procedure (**B**), **3ac** was obtained as white solid in 80% NMR yield and 64% isolated yield from 4-bromo-2-fluoroanisole using 60:1 petroleum ether/EtOAc as eluent.

$^1\text{H NMR}$  (400 MHz,  $\text{CDCl}_3$ )  $\delta$  7.53 (d,  $J = 8.2$  Hz, 1H), 7.49 (d,  $J = 11.7$  Hz, 1H), 6.95 (t,  $J = 8.0$  Hz, 1H), 3.91 (s, 3H), 1.33 (s, 12H).  $^{13}\text{C NMR}$  (151 MHz,  $\text{CDCl}_3$ )  $\delta$  152.92, 151.29, 150.34 (d,  $J = 10.6$  Hz), 131.59 (d,  $J = 3.7$  Hz), 121.79 (d,  $J = 16.1$  Hz), 112.60, 83.99, 56.11, 24.96.  $^{11}\text{B NMR}$  (128 MHz,  $\text{CDCl}_3$ )  $\delta$  30.69.  $^{19}\text{F NMR}$  (377 MHz,  $\text{CDCl}_3$ )  $\delta$  -137.15 (dd,  $J = 11.8, 8.2$  Hz). The NMR data were in consistent with the reported data.<sup>[1]</sup>

### 2-(3,5-dimethylphenyl)-4,4,5,5-tetramethyl-1,3,2-dioxaborolane (**3ad**)

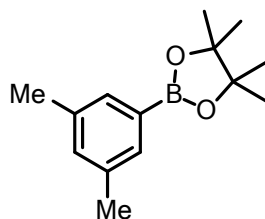

Following general procedure (B), **3ad** was obtained as white solid in 68% isolated yield from 3,5-dimethylbromobenzene using 60:1 petroleum ether/EtOAc as eluent. Following general procedure (C), **11p** was obtained in 60% NMR yield and 55% isolated yield from 3,5-dimethylchlorobenzene using 60:1 petroleum ether/EtOAc as eluent.

$^1\text{H NMR}$  (400 MHz,  $\text{CDCl}_3$ )  $\delta$  7.45 (s, 2H), 7.11 (s, 1H), 2.33 (s, 6H), 1.35 (s, 12H).  $^{13}\text{C NMR}$  (151 MHz,  $\text{CDCl}_3$ )  $\delta$  137.29, 133.12, 132.53, 83.81, 24.98, 21.26.  $^{11}\text{B NMR}$  (128 MHz,  $\text{CDCl}_3$ )  $\delta$  31.52. The NMR data were in consistent with the reported data.<sup>[1]</sup>

### 2-(3,5-dimethoxyphenyl)-4,4,5,5-tetramethyl-1,3,2-dioxaborolane (3ae)

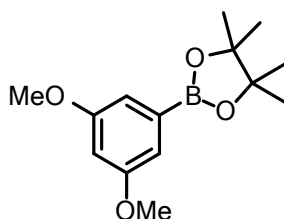

Following general procedure (B), **3ae** was obtained as white solid in 74% NMR yield and 73% isolated yield from 3,5-dimethoxy-1-bromobenzene using 30:1 petroleum ether/EtOAc as eluent. Following procedure (C), **11o** was obtained in 61% NMR yield and 44% isolated yield from 3,5-dimethoxy-1-chlorobenzene using 30:1 petroleum ether/EtOAc as eluent.

$^1\text{H NMR}$  (400 MHz,  $\text{CDCl}_3$ )  $\delta$  6.95 (t,  $J = 1.8$  Hz, 2H), 6.57 (d,  $J = 2.2$  Hz, 1H), 3.81 (s, 6H), 1.34 (s, 12H).  $^{13}\text{C NMR}$  (151 MHz,  $\text{CDCl}_3$ )  $\delta$  160.52, 111.73, 104.64, 83.81 (d,  $J = 56.5$  Hz), 55.53, 25.06 (d,  $J = 26.9$  Hz).  $^{11}\text{B NMR}$  (128 MHz,  $\text{CDCl}_3$ )  $\delta$  30.82. The NMR data were in consistent with the reported data.<sup>[1]</sup>

### 2-(benzofuran-5-yl)-4,4,5,5-tetramethyl-1,3,2-dioxaborolane (3af)

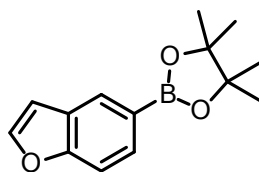

Following general procedure (B), **3af** was obtained as white solid in 29% NMR yield and 23% isolated yield from 5-bromo-1-benzofuran using 60:1 petroleum ether/EtOAc as eluent.

$^1\text{H NMR}$  (400 MHz,  $\text{CDCl}_3$ )  $\delta$  8.11 (s, 1H), 7.76 (d,  $J = 8.2$  Hz, 1H), 7.61 (d,  $J = 2.2$  Hz, 1H), 7.50 (d,  $J = 8.2$  Hz, 1H), 6.78 – 6.74 (m, 1H), 1.37 (s, 12H). The NMR data were in consistent with the reported data.<sup>[1]</sup>

### 2-(benzo[b]thiophen-7-yl)-4,4,5,5-tetramethyl-1,3,2-dioxaborolane (3ag)



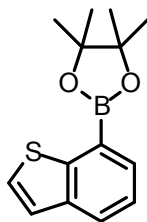

Following general procedure **(B)** and extend the reaction time to 48h, **3ag** was obtained as white solid in 88% NMR yield and 54% isolated yield from 7-bromo-1-benzothiophene using 60:1 petroleum ether/EtOAc as eluent.

$^1\text{H NMR}$  (400 MHz,  $\text{CDCl}_3$ )  $\delta$  7.92 (d,  $J = 8.0$  Hz, 1H), 7.84 (d,  $J = 7.0$  Hz, 1H), 7.48 (d,  $J = 5.5$  Hz, 1H), 7.38 (t,  $J = 7.3$  Hz, 1H), 7.34 (d,  $J = 5.5$  Hz, 1H), 1.41 (s, 12H). The NMR data were in consistent with the reported data.<sup>[7]</sup>

### 1-methyl-4-(4,4,5,5-tetramethyl-1,3,2-dioxaborolan-2-yl) indole (**3ah**)

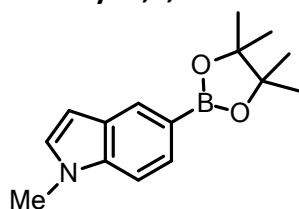

Following general procedure **(B)**, **3ah** was obtained as colourless solid in 77% NMR yield and 61% isolated yield from 4-bromo-1-methyl-1H-indole using 40:1 petroleum ether/EtOAc as eluent.

$^1\text{H NMR}$  (400 MHz,  $\text{CDCl}_3$ )  $\delta$  8.17 (s, 1H), 7.68 (d,  $J = 8.2$  Hz, 1H), 7.33 (d,  $J = 8.3$  Hz, 1H), 7.04 (t,  $J = 2.4$  Hz, 1H), 6.51 (t,  $J = 2.3$  Hz, 1H), 3.79 (d,  $J = 1.7$  Hz, 3H), 1.38 (s, 12H). The NMR data were in consistent with the reported data.<sup>[12]</sup>

### 2-(benzofuran-4-yl)-4,4,5,5-tetramethyl-1,3,2-dioxaborolane (**3ai**)

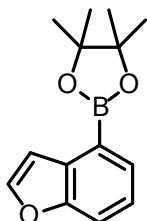

Following general procedure **(B)**, **3ai** was obtained as colourless liquid in 36% NMR yield and 21% isolated yield from 4-bromo-1-benzofuran using 50:1 petroleum ether/EtOAc as eluent.

$^1\text{H NMR}$  (400 MHz,  $\text{CDCl}_3$ )  $\delta$  7.72 (d,  $J = 7.2$  Hz, 1H), 7.65 (s, 1H), 7.59 (d,  $J = 8.2$  Hz, 1H), 7.30 (t,  $J = 7.7$  Hz, 1H), 7.23 (s, 1H), 1.39 (s, 12H). The NMR data were in consistent with the reported data.<sup>[13]</sup>

### 2-(4-methoxyphenyl)-4,4,6-trimethyl-1,3,2-dioxaborinane (**4a**)

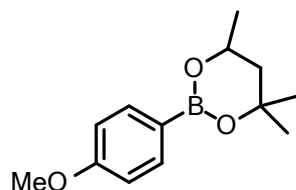

Following general procedure **(D)**, **4a** was obtained as colourless liquid in 69% isolated yield using 40:1 petroleum ether/EtOAc as eluent.

$^1\text{H NMR}$  (400 MHz,  $\text{CDCl}_3$ )  $\delta$  7.76 (d,  $J = 8.4$  Hz, 2H), 6.87 (d,  $J = 8.3$  Hz, 2H), 4.33 (dq,  $J = 12.2, 6.2, 2.9$  Hz, 1H), 3.82 (s, 3H), 1.85 (dd,  $J = 13.8, 3.0$  Hz, 1H), 1.57 (t,  $J = 12.7$  Hz, 1H), 1.37 (s, 3H), 1.36 (s, 3H), 1.34 (d,  $J = 6.2$  Hz, 3H). The NMR data were in consistent with the reported data.<sup>[7]</sup>

### 2-(4-methoxyphenyl)-4,4,6,6-tetramethyl-1,3,2-dioxaborinane (5a)

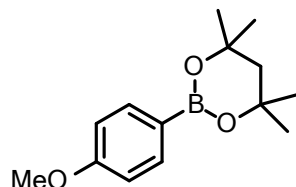

Following general procedure (D), **5a** was obtained as colourless liquid in 61% isolated yield using 60:1 petroleum ether/EtOAc as eluent.

$^1\text{H NMR}$  (400 MHz,  $\text{CDCl}_3$ )  $\delta$  7.79 (d,  $J = 8.7$  Hz, 2H), 6.88 (d,  $J = 8.6$  Hz, 2H), 3.82 (s, 3H), 1.90 (s, 2H), 1.42 (s, 12H). The NMR data were in consistent with the reported data.<sup>[14]</sup>

### 2-(4-methoxyphenyl)-5,5-dimethyl-1,3,2-dioxaborinane (6a)

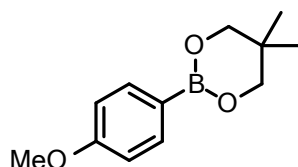

Following general procedure (D), **6a** was obtained as white solid in 82% NMR yield and 49% isolated yield using 60:1 petroleum ether/EtOAc as eluent.

$^1\text{H NMR}$  (400 MHz,  $\text{CDCl}_3$ )  $\delta$  7.74 (d,  $J = 8.5$  Hz, 2H), 6.89 (d,  $J = 8.5$  Hz, 2H), 3.82 (s, 3H), 3.75 (s, 4H), 1.02 (s, 6H).  $^{13}\text{C NMR}$  (151 MHz,  $\text{CDCl}_3$ )  $\delta$  161.88, 135.65, 113.27, 72.38, 55.17, 32.01, 22.04.  $^{11}\text{B NMR}$  (193 MHz,  $\text{CDCl}_3$ )  $\delta$  26.79. (signal for the carbon that is attached to the boron atom was not observed). The NMR data were in consistent with the reported data.<sup>[7]</sup>

### fluorene(9a)

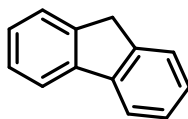

Following general procedure (B), **9a** was obtained as white solid in 65% isolated yield using petroleum ether as eluent.

$^1\text{H NMR}$  (400 MHz,  $\text{CDCl}_3$ )  $\delta$  7.82 (d,  $J = 7.5$  Hz, 2H), 7.57 (d,  $J = 7.4$  Hz, 2H), 7.41 (t,  $J = 7.4$  Hz, 2H), 7.33 (td,  $J = 7.4, 1.3$  Hz, 2H), 3.93 (s, 2H). The NMR data were in consistent with the reported data.<sup>[15]</sup>

### 2-(4-(triisopropylsilyloxy) phenyl)-4,4,5,5-tetramethyl-1,3,2-dioxaborolane(13c)

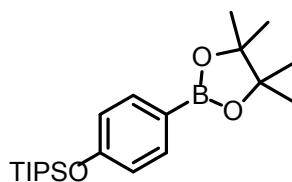

(triisopropylsilyloxy)benzene was synthesized according to the literature precedent:<sup>[16]</sup> Phenol (2 g, 21.25 mmol) and imidazole (3.62 g, 53.13 mmol) were dissolved in 130 mL of DCM. Triisopropylsilyl chloride (5.45 mL, 25.5 mmol) was added to the mixture and the mixture stirred at room temperature until no starting material remained by TLC. The reaction mixture was extracted using distilled H<sub>2</sub>O (1 x 70 mL) and the organic layer was washed with 1 N NaOH (1 x 70 mL) and brine (1 x 70 mL), dried over using Na<sub>2</sub>SO<sub>4</sub> and concentrated to afford pure product as a faint-brown oil. Analytical data matched that reported in the literature.<sup>[16]</sup> <sup>1</sup>H NMR (600 MHz, CDCl<sub>3</sub>) δ 7.22 (dt, J = 7.0, 4.4 Hz, 2H), 6.93 (dt, J = 7.6, 4.6 Hz, 1H), 6.89 (dd, J = 8.3, 2.7 Hz, 2H), 1.30 – 1.23 (m, 3H), 1.11 (dd, J = 7.9, 3.0 Hz, 18H).

Following general procedure (E), **13c** was obtained as colourless liquid in 74% NMR yield and 37% isolated yield from (triisopropylsilyloxy)benzene using 90:1 petroleum ether/EtOAc as eluent.

<sup>1</sup>H NMR (400 MHz, CDCl<sub>3</sub>) δ 7.72 – 7.65 (m, 2H), 6.90 – 6.83 (m, 2H), 1.33 (s, 12H), 1.31 – 1.20 (m, 3H), 1.09 (d, J = 7.3 Hz, 18H). <sup>13</sup>C NMR (151 MHz, CDCl<sub>3</sub>) δ 159.10, 136.57, 119.52, 83.65, 25.02, 18.05, 12.85 (signal for the carbon that is attached to the boron atom was not observed). <sup>11</sup>B NMR (128 MHz, CDCl<sub>3</sub>) δ 32.12. The NMR data were in consistent with the reported data.<sup>[17]</sup>

### 2-[4-[[1,1-dimethylethyl] diphenylsilyl] oxy] phenyl]-4,4,5,5-tetramethyl-1,3,2-dioxaborolane(**13d**)

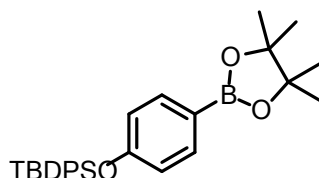

*tert*-Butyl(phenoxy)diphenylsilane was synthesized according to literature precedent:<sup>[16]</sup> phenol (2 g, 21 mmol) and imidazole (2.6 g, 38.5 mmol) were dissolved in 20 mL of MeCN. *tert*Butyldiphenylsilyl chloride (4.6 mL, 17.5 mmol) was added to the mixture and the reaction was allowed to stir overnight. The reaction was diluted with 40 mL Et<sub>2</sub>O and poured into 50 mL of water. The organic layer was extracted with Et<sub>2</sub>O (2 x 40 mL), washed with brine (1 x 50 mL) and dried using Na<sub>2</sub>SO<sub>4</sub>. The crude product was purified by column chromatography to afford the pure product as a colourless oil. Analytical data matched that reported in the literature.<sup>[18]</sup> <sup>1</sup>H NMR (400 MHz, CDCl<sub>3</sub>) δ 7.77 – 7.70 (m, 4H), 7.47 – 7.35 (m, 6H), 7.15 – 7.07 (m, 2H), 6.91 – 6.85 (m, 1H), 6.82 – 6.75 (m, 2H), 1.12 (s, 9H).

Following general procedure (E), **13d** was obtained as white solid in 43% NMR yield and 26% isolated yield from *tert*-Butyl(phenoxy)diphenylsilane using 60:1 petroleum ether/EtOAc as eluent.

<sup>1</sup>H NMR (400 MHz, CDCl<sub>3</sub>) δ 7.73 (dd, J = 8.0, 1.5 Hz, 4H), 7.58 (d, J = 8.5 Hz, 2H), 7.46 – 7.34 (m, 6H), 6.81 – 6.74 (m, 2H), 1.31 (s, 12H), 1.11 (s, 9H). <sup>13</sup>C NMR (101 MHz, CDCl<sub>3</sub>) δ 136.37, 135.59, 132.87, 130.03, 127.91, 119.37, 83.61, 26.62, 25.17, 24.98, 19.60. (Signal for the carbon that is attached to the boron atom was not observed.). <sup>11</sup>B NMR (128 MHz, CDCl<sub>3</sub>) δ 32.76. The NMR data were in consistent with the reported data.<sup>[19]</sup>

### 2-(4,5-dimethoxy-2-methylphenyl)-4,4,5,5-tetramethyl-1,3,2-dioxaborolane(**13h**)

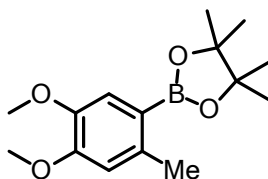

Following general procedure (E), **13h** was obtained as white solid in 76% NMR yield and 55% isolated yield from 1,2-dimethoxy-4-methylbenzene using 20:1 petroleum ether/EtOAc as eluent.

$^1\text{H NMR}$  (400 MHz,  $\text{CDCl}_3$ )  $\delta$  7.19 (s, 1H), 6.62 (s, 1H), 3.83 (s, 3H), 3.81 (s, 3H), 2.44 (s, 3H), 1.27 (s, 12H).

### Methyl dehydroabietate derivative (**14**)

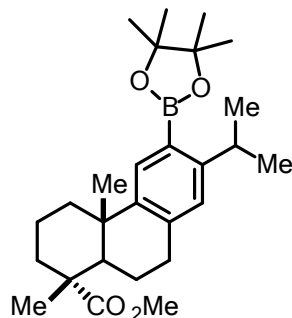

Following general procedure (E), **14** was obtained as white solid in 55% NMR yield and 51% isolated yield from methyl dehydroabietate using 75:1 petroleum ether/EtOAc as eluent.

$^1\text{H NMR}$  (600 MHz,  $\text{CDCl}_3$ )  $\delta$  7.62 (s, 1H), 6.95 (s, 1H), 3.66 (s, 3H), 3.61 (p,  $J = 6.9$  Hz, 1H), 2.91 – 2.86 (m, 2H), 2.42 (dt,  $J = 13.4, 3.0$  Hz, 1H), 2.22 (dd,  $J = 12.6, 2.2$  Hz, 1H), 1.86 – 1.71 (m, 4H), 1.66 – 1.62 (m, 1H), 1.52 (dt,  $J = 12.6, 6.2$  Hz, 1H), 1.41 (ddq,  $J = 12.1, 5.7, 3.3, 2.5$  Hz, 1H), 1.33 (s, 12H), 1.28 (s, 3H), 1.22 (s, 3H), 1.21 (d,  $J = 7.0$  Hz, 3H), 1.19 (d,  $J = 6.9$  Hz, 3H).  $^{13}\text{C NMR}$  (151 MHz,  $\text{CDCl}_3$ )  $\delta$  179.33, 152.45, 145.96, 138.08, 132.02, 125.17, 83.22, 52.02, 47.83, 45.08, 38.00, 36.98, 36.85, 31.02, 30.34, 25.12, 24.95 (d,  $J = 4.2$  Hz), 24.77, 24.39, 21.76, 18.68 (signal for the carbon that is attached to the boron atom was not observed).  $^{11}\text{B NMR}$  (193 MHz,  $\text{CDCl}_3$ )  $\delta$  32.56. **HRMS** calculated for  $\text{C}_{27}\text{H}_{41}\text{B}_1\text{O}_4$  ( $M + \text{Na}^+$ ): 463.29901, found: 463.29868.

### Phenylalanine derivative (**15**)

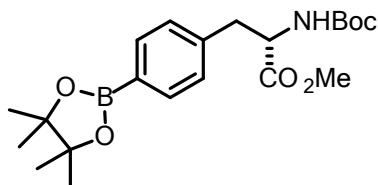

Following general procedure (B), **15** was obtained as colourless liquid in 66% NMR yield and 63% isolated yield from N-Boc-4-bromo-L-phenylalanine methyl ester using 10:1 petroleum ether/EtOAc as eluent.

$^1\text{H NMR}$  (600 MHz,  $\text{CDCl}_3$ )  $\delta$  7.73 (d,  $J = 7.6$  Hz, 2H), 7.12 (d,  $J = 7.5$  Hz, 2H), 4.95 (d,  $J = 8.3$  Hz, 1H), 4.58 (q,  $J = 6.7$  Hz, 1H), 3.70 (s, 3H), 3.10 (qd,  $J = 13.8, 5.7$  Hz, 2H), 1.42 (s, 9H), 1.33 (s, 12H).  $^{13}\text{C NMR}$  (151 MHz,  $\text{CDCl}_3$ )  $\delta$  172.35, 155.19, 139.35, 135.14, 128.83, 83.91, 80.07, 54.48, 52.32, 38.55, 28.43, 25.00 (d,  $J = 2.6$  Hz) (signal for the carbon that is attached to the boron atom was not observed).  $^{11}\text{B NMR}$  (193 MHz,  $\text{CDCl}_3$ )  $\delta$  31.41. **HRMS** calculated for  $\text{C}_{21}\text{H}_{32}\text{B}_1\text{N}_1\text{O}_6$  ( $M + \text{Na}^+$ ): 428.22149, found: 428.22122.

### Atomoxetine derivative (**16**)

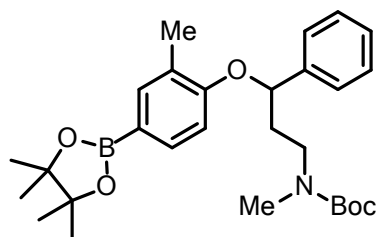

Following general procedure (E), **16** was obtained as colourless oil in 81% isolated yield from Atomoxetine derivative using 15:1 petroleum ether/EtOAc as eluent.

$^1\text{H NMR}$  (600 MHz,  $\text{CDCl}_3$ )  $\delta$  7.58 (s, 1H), 7.43 (d,  $J = 6.6$  Hz, 1H), 7.30 (d,  $J = 5.0$  Hz, 4H), 7.22 (dt,  $J = 9.1, 4.6$  Hz, 1H), 6.57 (d,  $J = 8.2$  Hz, 1H), 5.21 (d,  $J = 8.5$  Hz, 1H), 3.41 (s, 2H), 2.83 (s, 3H), 2.33 (s, 3H), 2.24 – 2.05 (m, 2H), 1.43 – 1.34 (m, 9H), 1.29 (d,  $J = 3.6$  Hz, 12H).  $^{13}\text{C NMR}$  (151 MHz,  $\text{CDCl}_3$ )  $\delta$  158.55, 155.89, 141.60, 137.32, 134.08, 128.80, 127.69, 126.36, 125.74, 112.11, 83.56, 79.51, 46.10, 37.39, 34.61, 28.52, 24.95 (d,  $J = 9.8$  Hz), 16.41 (signal for the carbon that is attached to the boron atom was not observed).

$^{11}\text{B NMR}$  (193 MHz,  $\text{CDCl}_3$ )  $\delta$  34.09. **HRMS** calculated for  $\text{C}_{28}\text{H}_{40}\text{B}_1\text{N}_1\text{O}_5$  ( $\text{M} + \text{Na}^+$ ): 504.28917, found: 504.28864.

#### Levodropropizine derivative (17)

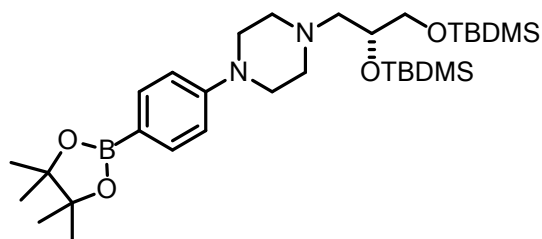

Following general procedure (E), **17** was obtained as colourless oil in 72% NMR yield and 66% isolated yield from Levodropropizine derivative using 25:1 petroleum ether/EtOAc as eluent.

$^1\text{H NMR}$  (600 MHz,  $\text{CDCl}_3$ )  $\delta$  7.70 (d,  $J = 8.2$  Hz, 2H), 6.88 (d,  $J = 8.2$  Hz, 2H), 3.84 – 3.76 (m, 1H), 3.60 (dd,  $J = 10.1, 5.8$  Hz, 1H), 3.53 (dd,  $J = 10.2, 5.5$  Hz, 1H), 3.24 (t,  $J = 5.0$  Hz, 3H), 2.66 (dt,  $J = 10.6, 5.0$  Hz, 2H), 2.62 – 2.54 (m, 2H), 2.49 (dd,  $J = 13.1, 4.7$  Hz, 1H), 2.37 (dd,  $J = 13.1, 6.0$  Hz, 1H), 2.04 (t,  $J = 12.2$  Hz, 1H), 1.32 (s, 12H), 0.89 (d,  $J = 5.2$  Hz, 18H), 0.09 – 0.07 (m, 6H), 0.06 (s, 6H).  $^{13}\text{C NMR}$  (151 MHz,  $\text{CDCl}_3$ )  $\delta$  153.66, 136.25, 114.34, 83.48, 72.00, 66.28, 62.12, 54.24, 48.29, 26.10 (d,  $J = 12.0$  Hz), 25.00, -4.74 (dd,  $J = 127.4, 9.3$  Hz) (signal for the carbon that is attached to the boron atom was not observed). **HRMS** calculated for  $\text{C}_{31}\text{H}_{59}\text{B}_1\text{N}_2\text{O}_4\text{Si}_2$  ( $\text{M} + \text{Na}^+$ ): 613.39986, found: 613.39868.

#### Gemfibrozil derivative (18)

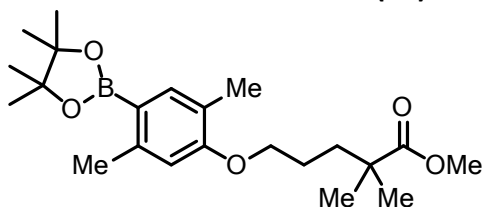

Following general procedure (E), **18** was obtained as colourless liquid in 82% NMR yield and 76% isolated yield from Gemfibrozil derivative using 70:1 petroleum ether/EtOAc as eluent.

$^1\text{H NMR}$  (600 MHz,  $\text{CDCl}_3$ )  $\delta$  7.54 (s, 1H), 6.59 (s, 1H), 3.94 (t,  $J = 5.4$  Hz, 2H), 3.67 (s, 3H), 2.51 (s, 3H), 2.17 (s, 3H), 1.72 (dd,  $J = 4.6, 3.0$  Hz, 4H), 1.33 (s, 12H), 1.22 (s, 6H).  $^{13}\text{C NMR}$  (151 MHz,  $\text{CDCl}_3$ )  $\delta$  178.41, 159.30, 144.79, 138.43, 122.95, 112.63, 83.15, 67.80, 51.85, 42.21, 37.15, 25.30,

25.24, 24.99, 22.34, 15.55 (signal for the carbon that is attached to the boron atom was not observed).  $^{11}\text{B}$  NMR (128 MHz,  $\text{CDCl}_3$ )  $\delta$  32.03. HRMS calculated for  $\text{C}_{22}\text{H}_{35}\text{B}_1\text{O}_5$  ( $\text{M} + \text{Na}^+$ ): 413.24698, found: 413.24646.

### 3.2 Reactivity of Dihaloarenes

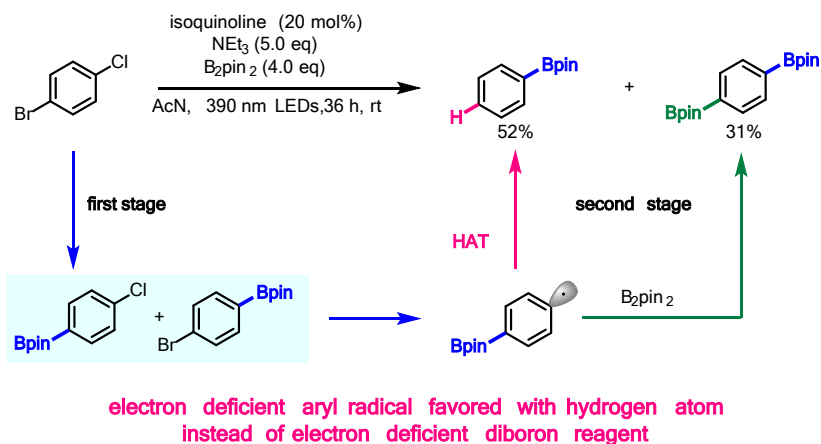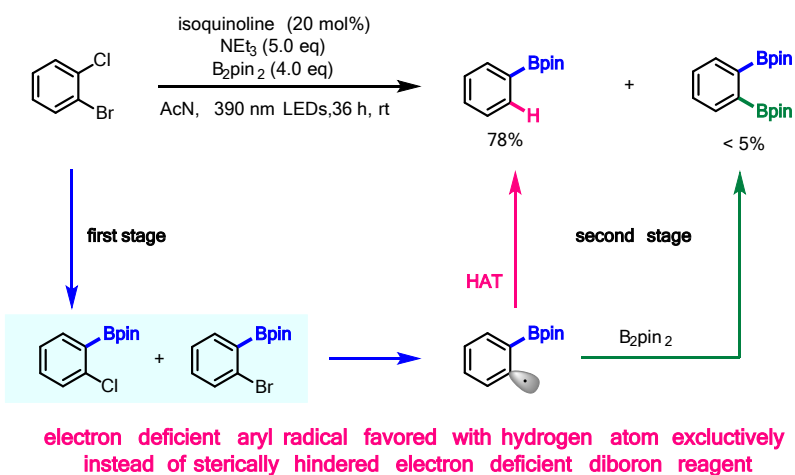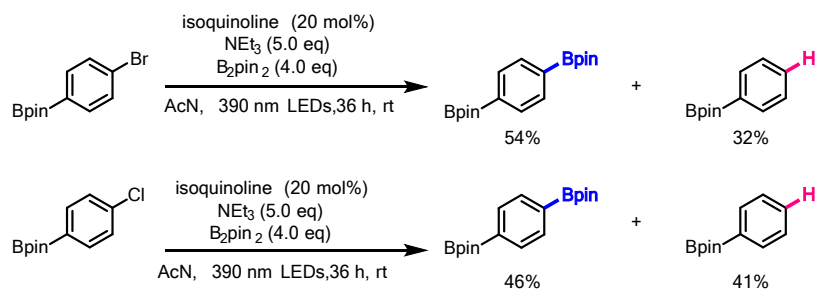

Table S3 Reactivity of dihaloarenes

### 3.3 Reactivities Screen of Aromatic Compounds with Different Leaving Groups

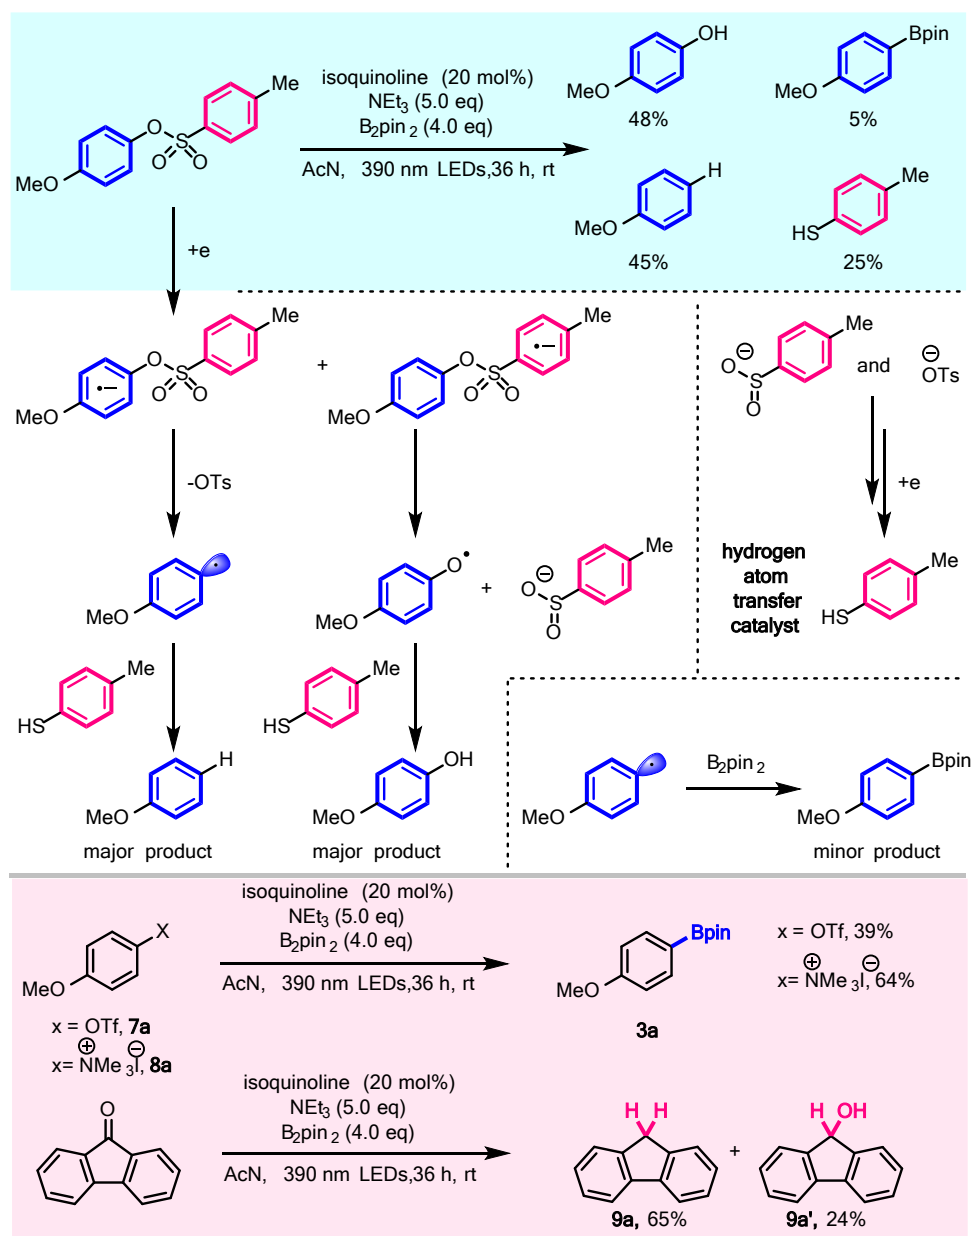

Table S4 Reactivities screen of aromatic compounds with different leaving groups

#### 4.) Preliminary Mechanistic Studies

##### 4.1 NMR Study of the B<sub>2</sub>pin<sub>2</sub>/NEt<sub>3</sub>/ Isoquinoline System

An oven-dried 2 mL vial was charged with a magnetic stir bar, B<sub>2</sub>pin<sub>2</sub> (51 mg, 0.2 mmol, 1.0 eq), NEt<sub>3</sub> (28 μL, 0.2 mmol, 1.0 eq), isoquinoline (26 mg, 0.2 mmol, 1.0 eq) and AcN (0.5 mL). The tube was sealed with a plastic cap and the reaction mixture was allowed to react at room temperature for 6 h.

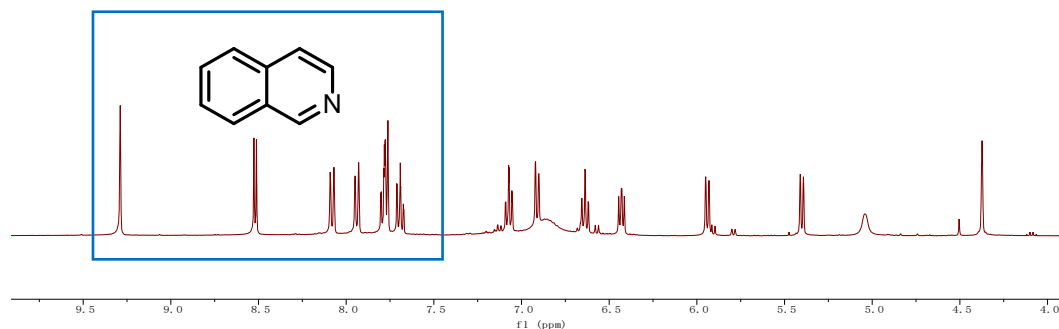

**Schme S2** The aromatic region of  $^1\text{H}$  NMR spectrum of  $\text{B}_2\text{Pin}_2/\text{NEt}_3/\text{isoquinoline}$  system

The  $^1\text{H}$  NMR spectrum of the  $\text{B}_2\text{pin}_2/\text{NEt}_3/\text{isoquinoline}$  reaction mixture was quite clear, and the aromatic region showed that isoquinoline was partly transformed to an intermediate specie. The peaks all shifted to upfield area and which around 4.5 ppm implied the formation of a dearomatized isoquinoline ring, where two new chemical bonds were probably connected to the N atom and 1-positions.

#### 4.2 Synthesis and Characterization of Dimer A

In order to determine the structure of intermediate specie. We found another kind of method to synthesize the intermediate in better efficiency. An oven-dried 2 mL vial was charged with a magnetic stir bar,  $\text{B}_2\text{pin}_2$  (254 mg, 1.0 mmol, 1.0 eq), isoquinoline (258 mg, 2.0 mmol, 2.0 eq) and AcN (0.5 mL). The tube was sealed with a plastic cap and the reaction mixture was allowed to react at room temperature for 30 min. During this time, some kind of white solid insoluble in AcN appeared. After filtration and washed with hexane, the intermediate specie was obtained in almost 99% yield as white solid. And the structure was determined by X-ray diffraction analysis as a *trans* dimer.

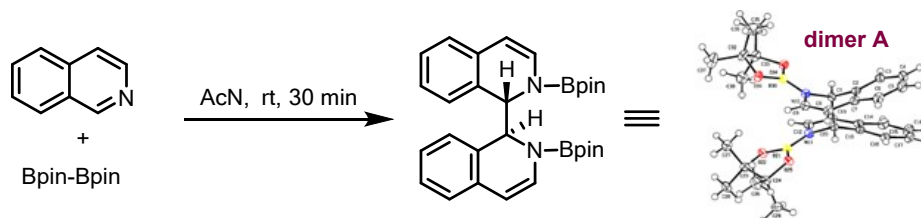

**Schme S3** Synthesis of dimer A and X-ray confirmation

$^1\text{H}$  NMR (400 MHz,  $\text{CDCl}_3$ )  $\delta$  7.10 (t,  $J = 7.6$  Hz, 2H), 7.00 (d,  $J = 7.6$  Hz, 2H), 6.67 (t,  $J = 7.5$  Hz, 2H), 6.58 (d,  $J = 7.3$  Hz, 2H), 5.87 (t,  $J = 6.9$  Hz, 4H), 4.57 (s, 2H), 1.27 (s, 24H).  $^{13}\text{C}$  NMR (101 MHz,  $\text{CDCl}_3$ )  $\delta$  132.41, 131.16, 129.00, 128.78, 127.25, 124.17, 122.92, 106.02, 83.35, 54.24, 25.52, 24.70. The NMR data were in consistent with the reported data.<sup>[20]</sup>

#### 4.3 X-ray Crystallographic Data of Dimer A

Single crystals of  $\text{C}_{30}\text{H}_{38}\text{B}_2\text{N}_2\text{O}_4$  [dimer A] were obtained by recrystallization from AcN / DCM at room temperature. A suitable crystal was selected and put on a XtaLAB Synergy R, DW system, HyPix diffractometer. The crystal was kept at 100.00(10) K during data collection. Using Olex2<sup>[21]</sup>, the structure was solved with the SHELXT<sup>[22]</sup> structure solution program using Intrinsic Phasing and refined with the SHELXL<sup>[23]</sup> refinement package using Least Squares minimisation.

Crystal Data for  $\text{C}_{30}\text{H}_{38}\text{B}_2\text{N}_2\text{O}_4$  ( $M = 512.24$  g/mol): monoclinic, space group  $P2_1/n$  (no. 14),  $a = 15.0763(3)$  Å,  $b = 9.9694(2)$  Å,  $c = 19.4363(4)$  Å,  $\beta = 103.775(2)^\circ$ ,  $V = 2837.29(10)$  Å<sup>3</sup>,  $Z = 4$ ,  $T = 100.00(10)$  K,  $\mu(\text{Cu K}\alpha) = 0.616$  mm<sup>-1</sup>,  $D_{\text{calc}} = 1.199$  g/cm<sup>3</sup>, 18990 reflections measured ( $6.702^\circ \leq$



$2\theta \leq 150.928^\circ$ ), 5671 unique ( $R_{\text{int}} = 0.0786$ ,  $R_{\text{sigma}} = 0.0694$ ) which were used in all calculations. The final  $R_1$  was 0.0512 ( $I > 2\sigma(I)$ ) and  $wR_2$  was 0.1438 (all data).

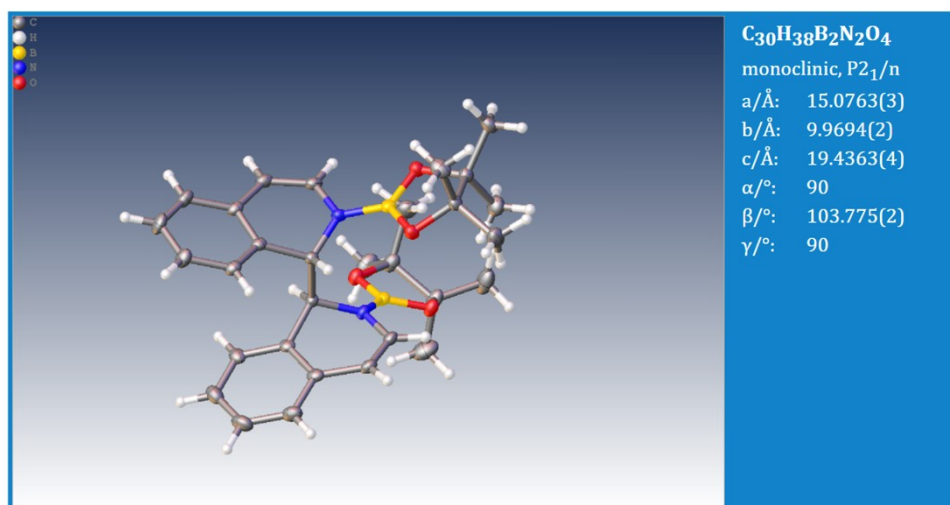

|                  |                                                 |
|------------------|-------------------------------------------------|
| Diffractometer   | XtaLAB Synergy R, DW system, HyPix              |
| Radiation Source | Cu K $\alpha$ ( $\lambda = 1.54184\text{\AA}$ ) |
| Data Collection  | CrysAlisPro 1.171.41.112a (Rigaku OD, 2021)     |

|                                      |                                                                              |
|--------------------------------------|------------------------------------------------------------------------------|
| Empirical formula                    | C <sub>30</sub> H <sub>38</sub> B <sub>2</sub> N <sub>2</sub> O <sub>4</sub> |
| Formula weight                       | 512.24                                                                       |
| Temperature/K                        | 100.00(10)                                                                   |
| Crystal system                       | monoclinic                                                                   |
| Space group                          | P2 <sub>1</sub> /n                                                           |
| a/Å                                  | 15.0763(3)                                                                   |
| b/Å                                  | 9.9694(2)                                                                    |
| c/Å                                  | 19.4363(4)                                                                   |
| $\alpha/^\circ$                      | 90                                                                           |
| $\beta/^\circ$                       | 103.775(2)                                                                   |
| $\gamma/^\circ$                      | 90                                                                           |
| Volume/Å <sup>3</sup>                | 2837.29(10)                                                                  |
| Z                                    | 4                                                                            |
| $\rho_{\text{calc}}/\text{mm}^3$     | 1.199                                                                        |
| $\mu/\text{mm}^{-1}$                 | 0.616                                                                        |
| F(000)                               | 1096                                                                         |
| Crystal size/mm <sup>3</sup>         | 0.15 × 0.1 × 0.1                                                             |
| 2 $\theta$ range for data collection | 6.702 to 150.928°                                                            |
| Index ranges                         | -17 ≤ h ≤ 18, -10 ≤ k ≤ 12, -24 ≤ l ≤ 24                                     |
| Reflections collected                | 18990                                                                        |
| Independent reflections              | 5671 [R(int) = 0.0786]                                                       |

|                                             |                                                   |
|---------------------------------------------|---------------------------------------------------|
| Data/restraints/parameters                  | 5671/0/351                                        |
| Goodness-of-fit on F <sup>2</sup>           | 1.055                                             |
| Final R indexes [ $I \geq 2\sigma(I)$ ]     | R <sub>1</sub> = 0.0512, wR <sub>2</sub> = 0.1356 |
| Final R indexes [all data]                  | R <sub>1</sub> = 0.0616, wR <sub>2</sub> = 0.1438 |
| Largest diff. peak/hole / e Å <sup>-3</sup> | 0.52/-0.31                                        |

**Table S3** Crystal data and structure refinement for dimer A

| Atom | x          | y          | z          | U(eq)   |
|------|------------|------------|------------|---------|
| O22  | 5742.0(7)  | 3059.7(11) | 5580.9(6)  | 19.9(2) |
| O34  | 7402.4(7)  | 5578.4(11) | 4421.8(6)  | 20.1(2) |
| O25  | 6704.3(7)  | 1299.6(11) | 5490.2(6)  | 20.0(2) |
| O31  | 8377.5(7)  | 4975.2(11) | 5480.0(6)  | 21.6(3) |
| N10  | 7926.6(8)  | 3236.4(13) | 4577.2(7)  | 17.5(3) |
| N11  | 6038.1(8)  | 2588.2(13) | 4413.6(7)  | 18.0(3) |
| C1   | 7380.8(10) | 2798.6(15) | 3884.6(8)  | 16.3(3) |
| C2   | 7970.6(10) | 2031.3(15) | 3493.4(8)  | 18.3(3) |
| C20  | 6573.1(10) | 1879.7(14) | 3986.6(8)  | 16.3(3) |
| C9   | 8500.4(10) | 2264.0(16) | 4972.9(8)  | 19.7(3) |
| C7   | 8613.3(10) | 1134.1(16) | 3895.9(9)  | 20.8(3) |
| C12  | 5384.4(10) | 3505.9(15) | 4061.9(9)  | 19.5(3) |
| C18  | 6173.2(10) | 335.5(15)  | 2919.4(9)  | 20.1(3) |
| C19  | 5986.4(10) | 1473.6(15) | 3274.8(8)  | 17.3(3) |
| C13  | 5030.8(10) | 3436.0(16) | 3362.2(9)  | 20.5(3) |
| C24  | 6453.4(11) | 1142.1(16) | 6167.1(8)  | 20.4(3) |
| C8   | 8789.9(10) | 1201.2(16) | 4665.7(9)  | 20.8(3) |
| C14  | 5264.5(10) | 2326.2(15) | 2952.6(8)  | 19.2(3) |
| C3   | 7846.8(11) | 2106.3(17) | 2762.1(9)  | 22.6(3) |
| C15  | 4769.2(11) | 2034.8(17) | 2261.2(9)  | 24.4(3) |
| C23  | 6122.2(10) | 2577.2(16) | 6300.5(8)  | 19.9(3) |
| C32  | 8338.9(12) | 6437.7(16) | 5472.1(9)  | 25.6(4) |
| C6   | 9089.7(11) | 284.5(18)  | 3538.9(10) | 27.5(4) |
| C17  | 5672.3(11) | 52.5(17)   | 2236.6(9)  | 25.5(3) |
| C4   | 8337.8(12) | 1253.4(18) | 2417.9(10) | 29.2(4) |
| C28  | 5376.1(12) | 2619.8(18) | 6706.3(9)  | 27.2(4) |
| C33  | 7445.2(11) | 6714.5(16) | 4901.7(9)  | 25.0(3) |
| C16  | 4973.4(12) | 920.4(18)  | 1905.2(9)  | 29.3(4) |

|     |            |            |            |         |
|-----|------------|------------|------------|---------|
| C5  | 8947.1(12) | 340.0(19)  | 2808.4(11) | 31.7(4) |
| C27 | 6903.6(13) | 3518.9(18) | 6634.8(10) | 29.6(4) |
| C29 | 5693.7(13) | 108.8(17)  | 6057.1(10) | 30.0(4) |
| C26 | 7283.3(13) | 654(2)     | 6713.9(10) | 32.4(4) |
| B21 | 6168.1(11) | 2330.6(17) | 5150.5(9)  | 17.7(3) |
| B30 | 7895.7(11) | 4573.7(17) | 4821.1(9)  | 17.8(3) |
| C38 | 6600.2(13) | 6614.9(19) | 5203.1(11) | 32.5(4) |
| C35 | 7428.4(14) | 8003.1(18) | 4493.2(12) | 36.5(4) |
| C37 | 8367.3(15) | 6943(2)    | 6204.7(11) | 40.8(5) |
| C36 | 9195.4(13) | 6898(2)    | 5239.3(14) | 41.2(5) |

**Table S4** Fractional Atomic Coordinates ( $\times 10^4$ ) and Equivalent Isotropic Displacement Parameters ( $\text{\AA}^2 \times 10^3$ ) for dimer A.  $U_{\text{eq}}$  is defined as 1/3 of the trace of the orthogonalised  $U_{ij}$  tensor.

| Atom | $U_{11}$ | $U_{22}$ | $U_{33}$ | $U_{23}$ | $U_{13}$ | $U_{12}$ |
|------|----------|----------|----------|----------|----------|----------|
| O22  | 20.1(5)  | 22.8(5)  | 17.6(5)  | 2.2(4)   | 5.8(4)   | 3.4(4)   |
| O34  | 20.1(5)  | 19.4(5)  | 18.9(5)  | -0.1(4)  | 0.8(4)   | -0.6(4)  |
| O25  | 19.2(5)  | 23.8(5)  | 18.0(5)  | 2.4(4)   | 6.4(4)   | 3.6(4)   |
| O31  | 20.9(5)  | 20.7(5)  | 19.9(6)  | -3.0(4)  | -1.7(4)  | 2.4(4)   |
| N10  | 14.2(6)  | 20.5(6)  | 16.0(6)  | -0.2(5)  | 0.1(5)   | 0.2(5)   |
| N11  | 13.8(6)  | 21.9(6)  | 18.7(6)  | 1.7(5)   | 5.0(5)   | 2.3(5)   |
| C1   | 14.8(6)  | 18.6(7)  | 14.8(7)  | 0.0(5)   | 2.1(5)   | -0.6(5)  |
| C2   | 13.3(6)  | 19.9(7)  | 22.2(8)  | -2.2(6)  | 5.6(5)   | -5.1(6)  |
| C20  | 13.4(6)  | 18.9(7)  | 16.7(7)  | -0.4(5)  | 3.9(5)   | 0.5(5)   |
| C9   | 13.6(6)  | 24.0(7)  | 19.2(7)  | 1.0(6)   | -0.5(5)  | -0.7(6)  |
| C7   | 13.6(6)  | 22.2(7)  | 26.9(8)  | -3.0(6)  | 5.2(6)   | -3.2(6)  |
| C12  | 14.8(7)  | 21.1(7)  | 23.6(8)  | 3.4(6)   | 6.4(6)   | 1.9(6)   |
| C18  | 15.8(7)  | 20.8(7)  | 22.7(8)  | 0.5(6)   | 2.7(6)   | -2.4(6)  |
| C19  | 13.1(6)  | 19.0(7)  | 19.7(7)  | 3.0(6)   | 3.5(5)   | -2.2(5)  |
| C13  | 14.5(7)  | 21.9(7)  | 24.6(8)  | 4.8(6)   | 4.0(6)   | 2.2(6)   |
| C24  | 22.4(7)  | 23.2(8)  | 16.4(7)  | 3.1(6)   | 6.4(6)   | 0.9(6)   |
| C8   | 13.8(7)  | 22.0(7)  | 24.5(8)  | 0.4(6)   | 0.7(6)   | 1.0(6)   |
| C14  | 14.6(7)  | 20.0(7)  | 21.7(8)  | 3.2(6)   | 1.8(6)   | -2.8(6)  |
| C3   | 20.1(7)  | 26.2(8)  | 23.3(8)  | -2.8(6)  | 8.6(6)   | -7.7(6)  |
| C15  | 18.1(7)  | 25.8(8)  | 25.0(8)  | 3.1(6)   | -3.8(6)  | 0.1(6)   |
| C23  | 20.2(7)  | 22.3(7)  | 17.4(7)  | 1.8(6)   | 4.8(6)   | 0.2(6)   |
| C32  | 26.3(8)  | 17.1(7)  | 27.9(9)  | -3.6(6)  | -4.5(7)  | -1.1(6)  |

|     |          |          |          |          |         |         |
|-----|----------|----------|----------|----------|---------|---------|
| C6  | 19.8(7)  | 27.1(8)  | 36.0(9)  | -6.4(7)  | 7.4(7)  | 0.8(6)  |
| C17 | 25.0(8)  | 22.9(8)  | 25.2(8)  | -4.1(6)  | -1.0(6) | -2.6(6) |
| C4  | 31.8(9)  | 34.4(9)  | 25.0(8)  | -7.0(7)  | 14.0(7) | -8.6(7) |
| C28 | 29.7(8)  | 32.3(9)  | 23.3(8)  | 0.1(7)   | 13.7(7) | 2.7(7)  |
| C33 | 24.8(8)  | 20.3(8)  | 26.4(8)  | -2.7(6)  | -0.7(6) | 1.9(6)  |
| C16 | 28.2(8)  | 30.8(9)  | 22.8(8)  | -3.6(7)  | -6.0(7) | -3.1(7) |
| C5  | 28.4(8)  | 33.4(9)  | 38.2(10) | -11.7(8) | 17.5(8) | -1.9(7) |
| C27 | 31.2(9)  | 29.2(9)  | 26.8(9)  | -4.7(7)  | 4.0(7)  | -5.4(7) |
| C29 | 35.5(9)  | 23.5(8)  | 35.0(10) | -0.4(7)  | 16.1(8) | -5.7(7) |
| C26 | 34.5(9)  | 38.0(10) | 23.6(8)  | 6.2(7)   | 4.5(7)  | 11.5(8) |
| B21 | 13.8(7)  | 20.8(8)  | 18.5(8)  | 1.6(6)   | 3.7(6)  | -1.7(6) |
| B30 | 13.2(7)  | 21.6(8)  | 18.2(8)  | -0.6(6)  | 3.0(6)  | -1.5(6) |
| C38 | 28.3(9)  | 31.2(9)  | 38.0(10) | -1.7(8)  | 7.9(8)  | 6.5(7)  |
| C35 | 39.0(10) | 22.7(9)  | 41.6(11) | 5.5(8)   | -2.7(8) | -0.5(7) |
| C37 | 45.4(11) | 33.6(10) | 34.6(11) | -12.9(8) | -7.8(9) | 8.9(9)  |
| C36 | 26.3(9)  | 33.9(10) | 59.4(14) | -1.3(9)  | 2.5(9)  | -7.2(8) |

**Table S5** Anisotropic displacement parameters ( $\text{\AA}^2 \times 10^3$ ) for dimer A. The anisotropic displacement factor exponent takes the form:  $-2\pi^2[h^2a^{*2}U_{11}+2hka^*b^*U_{12}+\dots]$ .

| Atom | Atom | Length/ $\text{\AA}$ | Atom | Atom | Length/ $\text{\AA}$ |
|------|------|----------------------|------|------|----------------------|
| O22  | C23  | 1.4610(19)           | C12  | C13  | 1.339(2)             |
| O22  | B21  | 1.377(2)             | C18  | C19  | 1.392(2)             |
| O34  | C33  | 1.459(2)             | C18  | C17  | 1.391(2)             |
| O34  | B30  | 1.373(2)             | C19  | C14  | 1.405(2)             |
| O25  | C24  | 1.4614(18)           | C13  | C14  | 1.455(2)             |
| O25  | B21  | 1.375(2)             | C24  | C23  | 1.557(2)             |
| O31  | C32  | 1.4591(19)           | C24  | C29  | 1.517(2)             |
| O31  | B30  | 1.373(2)             | C24  | C26  | 1.516(2)             |
| N10  | C1   | 1.4670(19)           | C14  | C15  | 1.404(2)             |
| N10  | C9   | 1.401(2)             | C3   | C4   | 1.398(2)             |
| N10  | B30  | 1.419(2)             | C15  | C16  | 1.382(3)             |
| N11  | C20  | 1.4687(18)           | C23  | C28  | 1.521(2)             |
| N11  | C12  | 1.398(2)             | C23  | C27  | 1.525(2)             |
| N11  | B21  | 1.422(2)             | C32  | C33  | 1.552(2)             |
| C1   | C2   | 1.509(2)             | C32  | C37  | 1.501(3)             |
| C1   | C20  | 1.5736(19)           | C32  | C36  | 1.537(3)             |

|     |     |          |     |     |          |
|-----|-----|----------|-----|-----|----------|
| C2  | C7  | 1.411(2) | C6  | C5  | 1.386(3) |
| C2  | C3  | 1.391(2) | C17 | C16 | 1.397(3) |
| C20 | C19 | 1.509(2) | C4  | C5  | 1.385(3) |
| C9  | C8  | 1.339(2) | C33 | C38 | 1.527(2) |
| C7  | C8  | 1.457(2) | C33 | C35 | 1.507(2) |
| C7  | C6  | 1.397(2) | □   | □   | □        |

**Table S6** Bond lengths for dimer A.

| Atom | Atom | Atom | Angle/°    |
|------|------|------|------------|
| B21  | O22  | C23  | 105.91(11) |
| B30  | O34  | C33  | 105.64(12) |
| B21  | O25  | C24  | 105.30(11) |
| B30  | O31  | C32  | 105.70(12) |
| C9   | N10  | C1   | 115.85(12) |
| C9   | N10  | B30  | 122.11(13) |
| B30  | N10  | C1   | 122.01(13) |
| C12  | N11  | C20  | 117.16(12) |
| C12  | N11  | B21  | 121.52(13) |
| B21  | N11  | C20  | 121.31(13) |
| N10  | C1   | C2   | 110.13(12) |
| N10  | C1   | C20  | 109.84(12) |
| C2   | C1   | C20  | 109.57(12) |
| C7   | C2   | C1   | 116.83(14) |
| C3   | C2   | C1   | 122.41(14) |
| C3   | C2   | C7   | 120.54(14) |
| N11  | C20  | C1   | 109.68(12) |
| N11  | C20  | C19  | 111.47(12) |
| C19  | C20  | C1   | 110.06(12) |
| C8   | C9   | N10  | 121.79(14) |
| C2   | C7   | C8   | 118.27(14) |
| C6   | C7   | C2   | 118.38(15) |
| C6   | C7   | C8   | 123.22(15) |
| C13  | C12  | N11  | 121.76(14) |
| C17  | C18  | C19  | 120.74(15) |
| C18  | C19  | C20  | 122.01(13) |
| C18  | C19  | C14  | 119.91(14) |

|     |     |     |            |
|-----|-----|-----|------------|
| C14 | C19 | C20 | 117.98(13) |
| C12 | C13 | C14 | 120.37(14) |
| O25 | C24 | C23 | 102.31(11) |
| O25 | C24 | C29 | 107.14(13) |
| O25 | C24 | C26 | 108.55(12) |
| C29 | C24 | C23 | 112.71(13) |
| C26 | C24 | C23 | 114.95(14) |
| C26 | C24 | C29 | 110.51(15) |
| C9  | C8  | C7  | 119.65(14) |
| C19 | C14 | C13 | 118.62(14) |
| C15 | C14 | C19 | 118.73(15) |
| C15 | C14 | C13 | 122.58(14) |
| C2  | C3  | C4  | 119.92(16) |
| C16 | C15 | C14 | 120.97(15) |
| O22 | C23 | C24 | 102.21(12) |
| O22 | C23 | C28 | 108.50(13) |
| O22 | C23 | C27 | 106.99(13) |
| C28 | C23 | C24 | 114.72(13) |
| C28 | C23 | C27 | 110.71(14) |
| C27 | C23 | C24 | 112.99(13) |
| O31 | C32 | C33 | 102.17(12) |
| O31 | C32 | C37 | 109.45(15) |
| O31 | C32 | C36 | 105.52(14) |
| C37 | C32 | C33 | 116.21(15) |
| C37 | C32 | C36 | 110.06(17) |
| C36 | C32 | C33 | 112.58(16) |
| C5  | C6  | C7  | 120.80(17) |
| C18 | C17 | C16 | 119.53(16) |
| C5  | C4  | C3  | 119.70(16) |
| O34 | C33 | C32 | 102.55(12) |
| O34 | C33 | C38 | 106.31(13) |
| O34 | C33 | C35 | 109.41(15) |
| C38 | C33 | C32 | 112.09(15) |
| C35 | C33 | C32 | 115.50(15) |
| C35 | C33 | C38 | 110.28(15) |
| C15 | C16 | C17 | 120.06(16) |

|     |     |     |            |
|-----|-----|-----|------------|
| C4  | C5  | C6  | 120.58(15) |
| O22 | B21 | N11 | 122.96(14) |
| O25 | B21 | O22 | 114.13(14) |
| O25 | B21 | N11 | 122.87(14) |
| O34 | B30 | O31 | 114.19(14) |
| O34 | B30 | N10 | 123.58(14) |
| O31 | B30 | N10 | 122.22(14) |

**Table S7** Bond angles for dimer A.

| <b>A</b> | <b>B</b> | <b>C</b> | <b>D</b> | <b>Angle<sup>o</sup></b> |
|----------|----------|----------|----------|--------------------------|
| O25      | C24      | C23      | O22      | 31.34(14)                |
| O25      | C24      | C23      | C28      | 148.53(13)               |
| O25      | C24      | C23      | C27      | -83.28(15)               |
| O31      | C32      | C33      | O34      | -30.84(16)               |
| O31      | C32      | C33      | C38      | 82.80(16)                |
| O31      | C32      | C33      | C35      | -149.75(15)              |
| N10      | C1       | C2       | C7       | 40.54(17)                |
| N10      | C1       | C2       | C3       | -144.68(14)              |
| N10      | C1       | C20      | N11      | 54.66(15)                |
| N10      | C1       | C20      | C19      | 177.64(11)               |
| N10      | C9       | C8       | C7       | 8.6(2)                   |
| N11      | C20      | C19      | C18      | -149.79(13)              |
| N11      | C20      | C19      | C14      | 33.91(18)                |
| N11      | C12      | C13      | C14      | 5.1(2)                   |
| C1       | N10      | C9       | C8       | 23.2(2)                  |
| C1       | N10      | B30      | O34      | -3.9(2)                  |
| C1       | N10      | B30      | O31      | 177.38(13)               |
| C1       | C2       | C7       | C8       | -11.89(19)               |
| C1       | C2       | C7       | C6       | 172.04(14)               |
| C1       | C2       | C3       | C4       | -172.26(14)              |
| C1       | C20      | C19      | C18      | 88.29(16)                |
| C1       | C20      | C19      | C14      | -88.01(15)               |
| C2       | C1       | C20      | N11      | 175.76(12)               |
| C2       | C1       | C20      | C19      | -61.25(15)               |
| C2       | C7       | C8       | C9       | -14.1(2)                 |
| C2       | C7       | C6       | C5       | 1.2(2)                   |

|     |     |     |     |             |
|-----|-----|-----|-----|-------------|
| C2  | C3  | C4  | C5  | -0.2(2)     |
| C20 | N11 | C12 | C13 | 22.4(2)     |
| C20 | N11 | B21 | O22 | 173.82(13)  |
| C20 | N11 | B21 | O25 | -8.6(2)     |
| C20 | C1  | C2  | C7  | -80.40(16)  |
| C20 | C1  | C2  | C3  | 94.39(16)   |
| C20 | C19 | C14 | C13 | -9.4(2)     |
| C20 | C19 | C14 | C15 | 173.74(13)  |
| C9  | N10 | C1  | C2  | -46.17(16)  |
| C9  | N10 | C1  | C20 | 74.60(15)   |
| C9  | N10 | B30 | O34 | 174.15(13)  |
| C9  | N10 | B30 | O31 | -4.6(2)     |
| C7  | C2  | C3  | C4  | 2.3(2)      |
| C7  | C6  | C5  | C4  | 0.9(3)      |
| C12 | N11 | C20 | C1  | 81.78(15)   |
| C12 | N11 | C20 | C19 | -40.37(17)  |
| C12 | N11 | B21 | O22 | -7.4(2)     |
| C12 | N11 | B21 | O25 | 170.09(14)  |
| C12 | C13 | C14 | C19 | -11.5(2)    |
| C12 | C13 | C14 | C15 | 165.31(15)  |
| C18 | C19 | C14 | C13 | 174.26(13)  |
| C18 | C19 | C14 | C15 | -2.6(2)     |
| C18 | C17 | C16 | C15 | -1.5(3)     |
| C19 | C18 | C17 | C16 | -0.1(2)     |
| C19 | C14 | C15 | C16 | 1.1(2)      |
| C13 | C14 | C15 | C16 | -175.69(15) |
| C24 | O25 | B21 | O22 | 13.46(17)   |
| C24 | O25 | B21 | N11 | -164.27(14) |
| C8  | C7  | C6  | C5  | -174.63(15) |
| C14 | C15 | C16 | C17 | 1.0(3)      |
| C3  | C2  | C7  | C8  | 173.22(14)  |
| C3  | C2  | C7  | C6  | -2.8(2)     |
| C3  | C4  | C5  | C6  | -1.5(3)     |
| C23 | O22 | B21 | O25 | 7.82(17)    |
| C23 | O22 | B21 | N11 | -174.45(14) |
| C32 | O31 | B30 | O34 | -11.37(17)  |



|     |     |     |     |             |
|-----|-----|-----|-----|-------------|
| C32 | O31 | B30 | N10 | 167.50(14)  |
| C6  | C7  | C8  | C9  | 161.79(15)  |
| C17 | C18 | C19 | C20 | -174.06(14) |
| C17 | C18 | C19 | C14 | 2.2(2)      |
| C33 | O34 | B30 | O31 | -9.56(17)   |
| C33 | O34 | B30 | N10 | 171.58(14)  |
| C29 | C24 | C23 | O22 | -83.39(15)  |
| C29 | C24 | C23 | C28 | 33.81(19)   |
| C29 | C24 | C23 | C27 | 161.99(14)  |
| C26 | C24 | C23 | O22 | 148.77(13)  |
| C26 | C24 | C23 | C28 | -94.04(17)  |
| C26 | C24 | C23 | C27 | 34.15(19)   |
| B21 | O22 | C23 | C24 | -24.04(14)  |
| B21 | O22 | C23 | C28 | -145.61(13) |
| B21 | O22 | C23 | C27 | 94.91(14)   |
| B21 | O25 | C24 | C23 | -27.22(15)  |
| B21 | O25 | C24 | C29 | 91.51(15)   |
| B21 | O25 | C24 | C26 | -149.14(14) |
| B21 | N11 | C20 | C1  | -99.43(15)  |
| B21 | N11 | C20 | C19 | 138.43(14)  |
| B21 | N11 | C12 | C13 | -156.44(15) |
| B30 | O34 | C33 | C32 | 24.76(15)   |
| B30 | O34 | C33 | C38 | -93.05(15)  |
| B30 | O34 | C33 | C35 | 147.87(14)  |
| B30 | O31 | C32 | C33 | 25.71(16)   |
| B30 | O31 | C32 | C37 | 149.44(15)  |
| B30 | O31 | C32 | C36 | -92.17(16)  |
| B30 | N10 | C1  | C2  | 131.95(14)  |
| B30 | N10 | C1  | C20 | -107.28(15) |
| B30 | N10 | C9  | C8  | -154.90(15) |
| C37 | C32 | C33 | O34 | -149.90(15) |
| C37 | C32 | C33 | C38 | -36.3(2)    |
| C37 | C32 | C33 | C35 | 91.2(2)     |
| C36 | C32 | C33 | O34 | 81.88(16)   |
| C36 | C32 | C33 | C38 | -164.49(15) |
| C36 | C32 | C33 | C35 | -37.0(2)    |

**Table S8** Torsion angles for dimer A.

| <b>Atom</b> | <b>x</b> | <b>y</b> | <b>z</b> | <b>U(eq)</b> |
|-------------|----------|----------|----------|--------------|
| H1          | 7123.11  | 3604.8   | 3600.34  | 20           |
| H20         | 6837.1   | 1051.3   | 4246.6   | 20           |
| H9          | 8689.22  | 2361.18  | 5472.71  | 24           |
| H12         | 5185.85  | 4197.49  | 4326.3   | 23           |
| H18         | 6648.16  | -254.62  | 3145.7   | 24           |
| H13         | 4624.95  | 4115.13  | 3132.03  | 25           |
| H8          | 9108.61  | 494.74   | 4948.06  | 25           |
| H3          | 7429.08  | 2736.39  | 2496.82  | 27           |
| H15         | 4286.46  | 2612.32  | 2034.56  | 29           |
| H6          | 9516.57  | -338.81  | 3800.12  | 33           |
| H17         | 5804.65  | -725.83  | 1997.18  | 31           |
| H4          | 8253.78  | 1300.27  | 1918.35  | 35           |
| H28A        | 5172.25  | 3547.74  | 6732.63  | 41           |
| H28B        | 5615.71  | 2272.06  | 7186.26  | 41           |
| H28C        | 4859.33  | 2066.94  | 6461.61  | 41           |
| H16         | 4638.15  | 744.45   | 1434.72  | 35           |
| H5          | 9270.24  | -253.91  | 2573.37  | 38           |
| H27A        | 7380.28  | 3468.72  | 6369.8   | 44           |
| H27B        | 7158.89  | 3252.69  | 7127.56  | 44           |
| H27C        | 6673.72  | 4440.31  | 6621.7   | 44           |
| H29A        | 5155.94  | 451.88   | 5714.62  | 45           |
| H29B        | 5535.26  | -68.81   | 6509.22  | 45           |
| H29C        | 5899.15  | -724.1   | 5876.56  | 45           |
| H26A        | 7435.58  | -259.04  | 6594.99  | 49           |
| H26B        | 7149.58  | 656.62   | 7183.21  | 49           |
| H26C        | 7801.34  | 1249.93  | 6716.86  | 49           |
| H38A        | 6050.18  | 6630.32  | 4814.34  | 49           |
| H38B        | 6587.91  | 7375.47  | 5520.08  | 49           |
| H38C        | 6620.25  | 5774.89  | 5468.24  | 49           |
| H35A        | 7912.72  | 7985.14  | 4234.77  | 55           |
| H35B        | 7527.2   | 8762.6   | 4822.78  | 55           |
| H35C        | 6834.43  | 8099.4   | 4156.46  | 55           |
| H37A        | 7862.92  | 6546.52  | 6373.45  | 61           |
| H37B        | 8307.82  | 7921.66  | 6194.67  | 61           |

|      |         |         |         |    |
|------|---------|---------|---------|----|
| H37C | 8949.51 | 6689.01 | 6524.11 | 61 |
| H36A | 9740.6  | 6535.1  | 5565.4  | 62 |
| H36B | 9224.39 | 7880.44 | 5245.29 | 62 |
| H36C | 9167.43 | 6573.33 | 4758.75 | 62 |

**Table S9** Hydrogen atom coordinates ( $\text{\AA} \times 10^4$ ) and isotropic displacement parameters ( $\text{\AA}^2 \times 10^3$ ) for dimer A.

#### 4.4 The Involvement of Dimer A in the Borylation Reaction

In order to figure out the action of dimer A in borylation reaction, the synthesized dimer was utilized as reactant in the borylation reaction.

##### General procedure (F):

An oven-dried 2 mL vial was charged with a magnetic stir bar, 4-bromoanisole (0.2 mmol),  $\text{B}_2\text{pin}_2$  (0 or 2.0 eq), dimer A (0.15 mmol, 0.75 eq),  $\text{NEt}_3$  (0 or 5.0 eq), AcN (0.5 mL). The vial was sealed with a plastic cap and then irradiated with 2\*390nm LEDs for 12 h. Solvent was removed by vacuum evaporation. Yield was determined by  $^1\text{H}$  NMR using pyrazine or HDMSO as the internal standard.

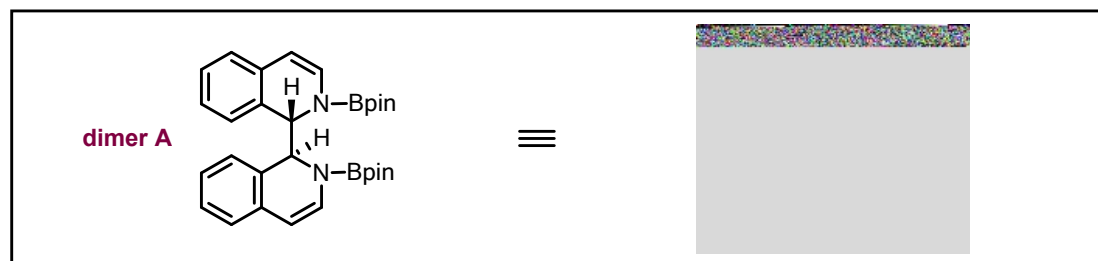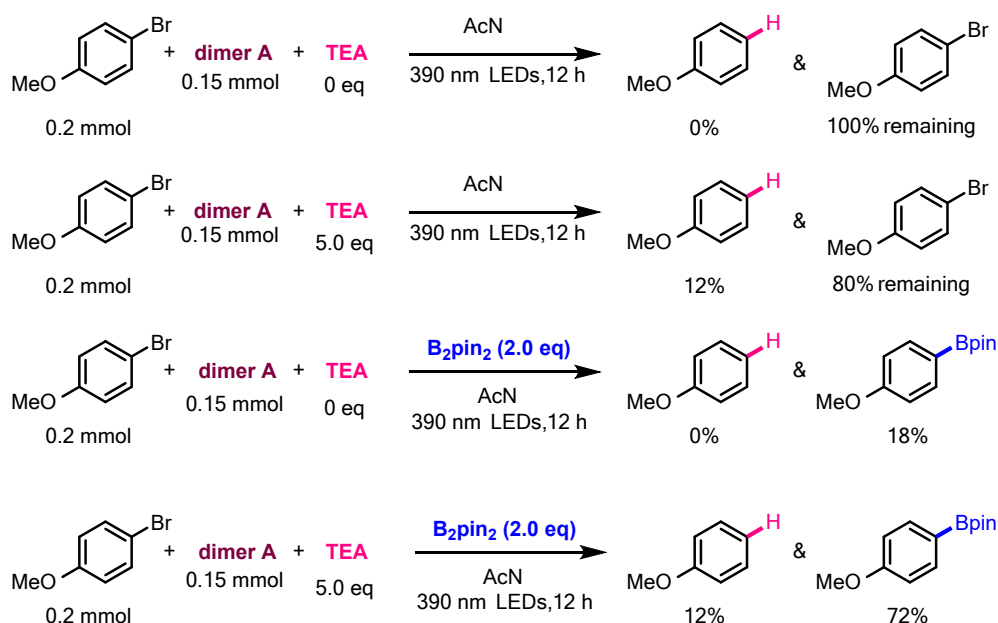

**Scheme S4** Mechanistic experiments

#### 4.5 UV-Vis Spectroscopic Study

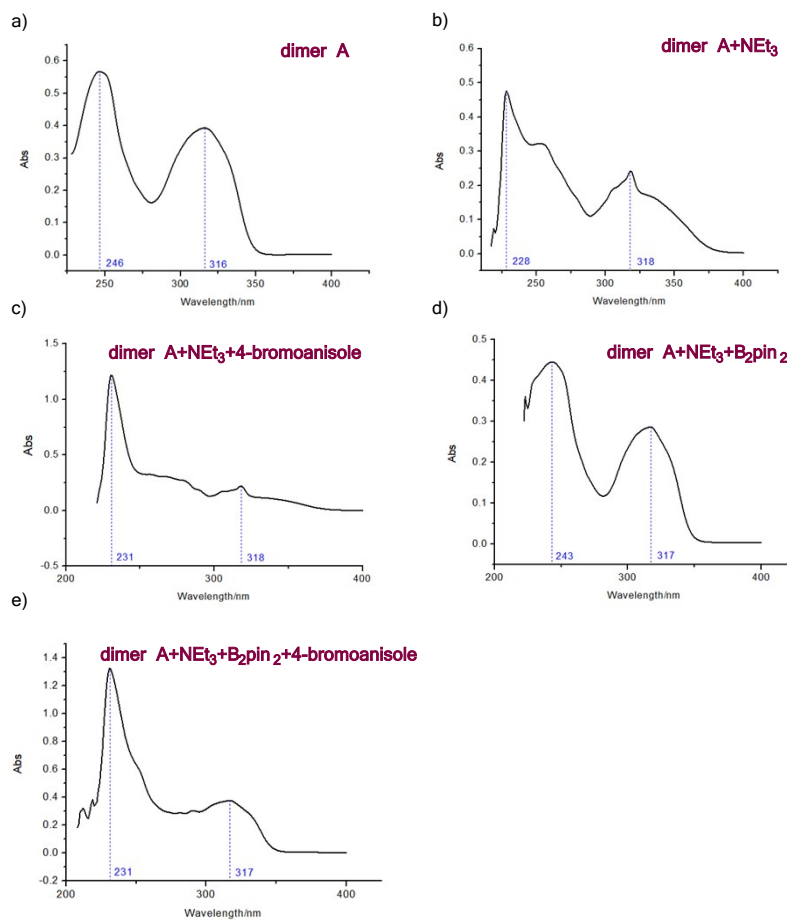

**Figure S1** Experimental UV-Vis Spectra: a) UV-Vis of dimer A; b) UV-Vis of dimer A+ NEt<sub>3</sub>; c) UV-Vis of dimer A+ NEt<sub>3</sub>+bromoanisole; d) UV-Vis of dimer A+ NEt<sub>3</sub>+ B<sub>2</sub>Pin<sub>2</sub>; e) UV-Vis of dimer A+ NEt<sub>3</sub>+ B<sub>2</sub>Pin<sub>2</sub>+bromoanisole;

Experimental procedure: An oven-dried 4 mL vial was charged with a magnetic stir bar and the corresponding samples: dimer A (10 μmol/mL, 1.0 eq), NEt<sub>3</sub> (50 μmol/mL 5.0 eq), 4-bromoanisole (10 μmol/mL, 1.0eq), B<sub>2</sub>pin<sub>2</sub> (20 μmol/mL, 2.0 eq), DCM (1.0 mL). After dissolving, transferring 8 μL of solution in 3mL of DCM to the cuvette for detection.

#### 4.6 Fluorescence quenching experiment

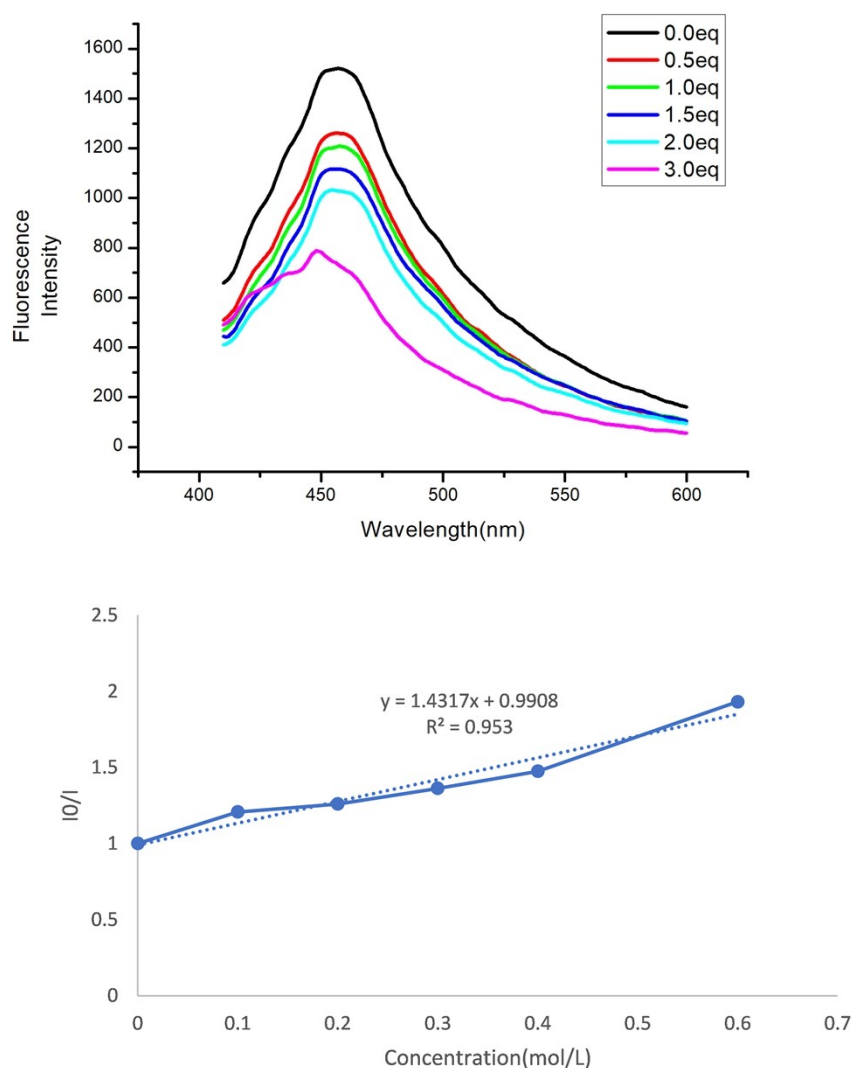

**Figure S1** Fluorescence quenching experiment

Experimental procedure: Fluorescence quenching experiments were carried out with the following samples: isoquinoline(25.83 mg, 0.2 mmol, 1.0 eq), B<sub>2</sub>pin<sub>2</sub> (50.79 mg, 0.2 mmol, 1.0 eq), NEt<sub>3</sub>(27.80 μL, 0.2 mmol, 1.0 eq), 4-bromoanisole with different concentration gradient (0.0 eq, 0.5 eq, 1.0 eq, 1.5 eq, 2.0 eq) in AcN (3.0 ml) for detection. The solutions were irradiated at 399 nm and emission was monitored from 410-650 nm.

### 5.) Computational data

All DFT calculations were performed using Gaussian 16 software.<sup>[24]</sup> Geometry optimization and frequency calculation of ground state were carried out with the M062X<sup>[25]</sup>- def2SVP<sup>[26]</sup> level of theory in PCM<sup>[27]</sup>-AcN solvent. The geometry optimization and single point energy of excited state was performed under time dependent density functional theory (TD-DFT) calculations<sup>[28-30]</sup> using M062X-def2SVP level of theory in PCM-AcN solvent. The relative free energies with zero-point energy (ZPE) and thermal energy corrections at 298.15K are shown in kcal/mol.

Standard reduction potential reference to the Saturated Calomel Electrode,  $E^0$  (V vs. SCE) was calculated as indicated in Eq. (1), -100.5 kcal/mol was assumed for the reduction free energy of the standard hydrogen electrode.<sup>[31]</sup>  $\Delta G_{\text{OX}} = G(\mathbf{B}^*) - G(\mathbf{B}^+)$ .

$$E^0 \text{ (V vs. SCE)} = (-100.5 - \Delta G_{\text{OX}}) / 23.06 - 0.24 \quad (1)$$

The excited-state reduction potential of  $\mathbf{B}^*$  compared to the Saturated Calomel Electrode were estimated to be -3.12 V by TD-DFT calculations. The binding energy for  $\mathbf{B}$  is 11.6 kcal/mol.

The UV-VIS spectrums calculated by TD-DFT are in the following figures.

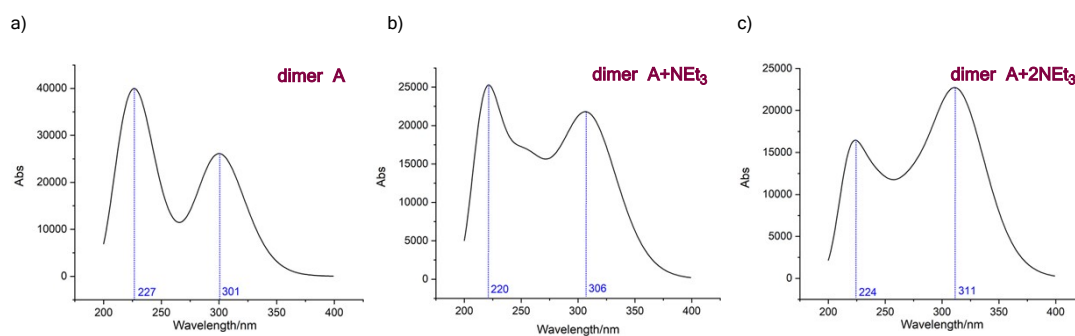

**Figure S2** Computational UV-Vis Spectra: a) UV-Vis of dimer A; b) UV-Vis of dimer A+  $\text{NEt}_3$ ; c) UV-Vis of dimer A+  $2\text{NEt}_3$ ;

| $\square$        | H            | G            |
|------------------|--------------|--------------|
| $\mathbf{B}^*$   | -1915.644431 | -1915.760427 |
| B cation         | -1915.589781 | -1915.706134 |
| Initial reactant | -1915.783309 | -1915.90804  |
| complex B        | -1915.774421 | -1915.889618 |

**Table S10** Energies for key geometries.

**Cartesian coordinates****B\***

C -4.21436200 -0.47681300 -1.48134800  
C -4.64427000 -1.17965300 -0.13772900  
C 0.49209300 -3.07734200 1.40511400  
C 0.34321200 -3.51912700 -0.10795500  
B -2.70028300 -0.06209100 0.16279600  
B 1.42970600 -1.47894900 -0.02451700  
C -1.06130500 -3.27338600 -0.65440000  
H -1.80961500 -3.92918900 -0.18758200  
H -1.05195800 -3.46450500 -1.73742900  
H -1.36058500 -2.22974400 -0.48483800  
C 0.74363700 -4.96325800 -0.37940100  
H 0.61810400 -5.18023900 -1.44960800  
H 0.10642900 -5.65599100 0.18921000  
H 1.79067500 -5.15342500 -0.11146700  
C 1.42115400 -3.97604600 2.22627500  
H 0.94343300 -4.94383000 2.43243400  
H 1.62294700 -3.48015300 3.18680300  
H 2.37812900 -4.17039900 1.73249000  
C -0.84170800 -3.00688600 2.14210300  
H -0.66914100 -2.64138800 3.16512100  
H -1.29421500 -4.00755100 2.20968000  
H -1.55315400 -2.34005600 1.64275300  
C -5.72863700 -0.41166200 0.61230700  
H -5.84834100 -0.85617700 1.60970200  
H -6.69228000 -0.46155400 0.08808200  
H -5.44897600 0.64445500 0.73666900  
C -5.03587800 -2.63824700 -0.29250200  
H -5.31358500 -3.04975100 0.68772900  
H -4.20742800 -3.23244400 -0.69709000  
H -5.90141000 -2.73208100 -0.96405300  
C -3.63907300 -1.43941100 -2.51407200  
H -3.19562000 -0.85214000 -3.33027000  
H -4.41962300 -2.08938100 -2.93222800  
H -2.85233000 -2.06664200 -2.07757100  
C -5.30459400 0.37115200 -2.11683100  
H -6.17562500 -0.25152200 -2.36695200  
H -4.92356500 0.81802800 -3.04537200  
H -5.62603500 1.18007400 -1.45015000  
O 1.22918800 -2.64901500 -0.80840000  
O 1.05475200 -1.76340100 1.31827800  
O -3.44611100 -1.09534100 0.66489800  
O -3.14311200 0.38812300 -1.05272400

C 2.38059800 4.33714000 -1.06251100  
C 2.00873000 3.24711800 -0.26692300  
C 1.36477300 2.14824800 -0.81408700  
C 1.06690400 2.10703500 -2.23620200  
C 1.38600000 3.27303500 -3.01589300  
C 2.02935500 4.34518900 -2.44438400  
H 2.92921400 5.17434100 -0.62934400  
H 2.20392700 3.26567700 0.81069300  
C 0.71433900 1.06909200 0.00711800  
C 0.48781600 0.93473100 -2.75193800  
H 1.12069900 3.28621600 -4.07635100  
H 2.27812500 5.21440900 -3.05692900  
C 0.35969800 -0.23401700 -1.95116300  
H 0.21262500 0.87315900 -3.80654600  
H 0.13343800 -1.20706100 -2.38648000  
C -0.81035200 1.56417500 0.21296800  
C -0.81693500 2.84152300 1.00440500  
C -0.80360000 4.10199400 0.40105900  
C -0.76346300 2.73149500 2.41205100  
C -1.45984300 0.41508500 2.24437700  
C -0.69528300 5.25432900 1.17481500  
H -0.83862400 4.17060000 -0.68959200  
C -0.62719200 3.90034400 3.18056300  
C -0.96537500 1.41651000 3.00587700  
H -1.80737800 -0.52392600 2.67403100  
C -0.58913000 5.14908900 2.56858800  
H -0.67393300 6.23378200 0.69475000  
H -0.57725400 3.81874800 4.26877600  
H -0.85881200 1.28113100 4.08197400  
H -0.48837400 6.04922700 3.17742500  
N -1.61525100 0.55271200 0.86874500  
N 0.74908500 -0.21808700 -0.64650600  
H 1.13415200 0.98604200 1.01530500  
H -1.20829500 1.71687800 -0.79800600  
N 3.16866500 -1.17425200 -0.06060000  
C 3.53686900 -0.83730800 -1.47182900  
H 2.73438300 -0.20789000 -1.86857400  
H 3.50389600 -1.78395800 -2.02922600  
C 4.84286300 -0.09174400 -1.71590500  
H 5.73688700 -0.62277400 -1.37157400  
H 4.93790600 0.05520900 -2.80072100  
H 4.82355000 0.90635300 -1.25616500  
C 3.44848600 -0.05964000 0.90085600  
H 3.20267700 0.87312100 0.37802700

H 2.73092100 -0.19164600 1.72158500  
C 4.84201300 0.04700600 1.50742500  
H 5.63343600 0.19879100 0.76472100  
H 4.83811700 0.92223900 2.17189800  
H 5.09514700 -0.82629000 2.12243700  
C 3.79779300 -2.45372400 0.39427500  
H 3.18245000 -3.25111000 -0.03476000  
H 3.66550400 -2.48251100 1.48275100  
C 5.24665500 -2.73495300 0.01717500  
H 5.96242200 -2.00200900 0.40471100  
H 5.50648800 -3.71282500 0.44634200  
H 5.37621000 -2.81507800 -1.07017300

### Bcation

C -4.28129100 -0.84877600 -1.36035300  
C -4.72715600 -1.31317700 0.07652100  
C 0.63345700 -3.10741700 1.10512800  
C 0.65711900 -3.42078400 -0.44204200  
B -2.68814100 -0.35693200 0.18266300  
B 1.68883100 -1.39528400 -0.07252600  
C -0.67893600 -3.11594300 -1.11521200  
H -1.45959000 -3.81906400 -0.79413500  
H -0.56252200 -3.20272500 -2.20540300  
H -1.01257800 -2.09277600 -0.88510900  
C 1.09220000 -4.83643600 -0.78778200  
H 1.07259400 -4.96914700 -1.87842600  
H 0.40808900 -5.57080400 -0.33891500  
H 2.10995000 -5.04349500 -0.43410300  
C 1.53218900 -4.02415800 1.93939300  
H 1.07062300 -5.01544100 2.04544500  
H 1.63827200 -3.58593400 2.94212900  
H 2.53092900 -4.16457300 1.51637400  
C -0.76223900 -3.17282700 1.71123200  
H -0.70318000 -2.94503300 2.78539800  
H -1.17433700 -4.18717000 1.60496200  
H -1.45331200 -2.46920200 1.23779700  
C -5.68294600 -0.32903200 0.74415900  
H -5.80282800 -0.61450100 1.79798900  
H -6.66994000 -0.34039800 0.26306700  
H -5.28496500 0.69559300 0.70722000  
C -5.28490000 -2.72346000 0.13924500  
H -5.57322200 -2.95707200 1.17326000  
H -4.54439600 -3.46285000 -0.18936600  
H -6.17860400 -2.80904800 -0.49533100

C -3.83852100 -2.00304000 -2.25017600  
H -3.33707500 -1.59356600 -3.13811800  
H -4.69978800 -2.60066500 -2.57764300  
H -3.13512000 -2.66049500 -1.72587600  
C -5.30336400 0.00890400 -2.08755500  
H -6.24001900 -0.54969100 -2.22674900  
H -4.91369000 0.27794300 -3.07897600  
H -5.51862300 0.93266500 -1.53753200  
O 1.62622600 -2.49821600 -0.95567900  
O 1.12092800 -1.75459200 1.17069500  
O -3.48934700 -1.25972000 0.82469800  
O -3.11543300 -0.04034100 -1.07768300  
C 2.08722300 4.56669400 -0.90545600  
C 1.75035600 3.44070200 -0.14785500  
C 1.23306800 2.31672600 -0.77714800  
C 1.05840900 2.30997900 -2.18526700  
C 1.37431200 3.46624400 -2.93488500  
C 1.88422400 4.58367200 -2.29265200  
H 2.49930200 5.44549700 -0.40816100  
H 1.86873100 3.45154100 0.93807100  
C 0.67033300 1.13702500 -0.03337000  
C 0.65615700 1.08478200 -2.79328700  
H 1.23108000 3.45854900 -4.01647700  
H 2.13646600 5.47506600 -2.86725700  
C 0.77765300 -0.10566100 -2.04527700  
H 0.45285500 1.02585600 -3.86155700  
H 0.85294200 -1.07289200 -2.54786500  
C -0.89732700 1.36888500 0.09771400  
C -1.12820600 2.66128400 0.84244000  
C -1.35398700 3.87833300 0.19992800  
C -1.02163500 2.60426600 2.24587300  
C -1.32590000 0.20054900 2.16599800  
C -1.43746600 5.05635700 0.94041000  
H -1.43504300 3.90606700 -0.89009100  
C -1.08672600 3.79921100 2.97969500  
C -0.96937500 1.28833600 2.87984900  
H -1.50125700 -0.76959400 2.63014400  
C -1.28631400 5.01427500 2.32993500  
H -1.60310000 6.00842700 0.43475400  
H -1.00148500 3.76369500 4.06766500  
H -0.79521000 1.20610800 3.95211400  
H -1.33738000 5.93646600 2.91092200  
N -1.54692600 0.27188800 0.78733600  
N 0.97079300 -0.10644600 -0.74030000



|                         |             |             |             |   |             |             |             |
|-------------------------|-------------|-------------|-------------|---|-------------|-------------|-------------|
| H                       | 1.05044600  | 1.07038900  | 0.98979100  | C | -1.18825800 | -2.72672200 | 3.55210300  |
| H                       | -1.30669700 | 1.42539100  | -0.91990000 | H | -0.81978800 | -2.09982000 | 4.37597500  |
| N                       | 3.33304200  | -0.96590900 | 0.10985200  | H | -1.23578700 | -3.76696500 | 3.90521900  |
| C                       | 3.89154900  | -0.60626300 | -1.23714000 | H | -2.19977500 | -2.39377400 | 3.28852500  |
| H                       | 3.12551200  | -0.02972400 | -1.76465600 | C | -5.90685500 | -0.06612700 | -1.10150500 |
| H                       | 4.00356800  | -1.55398300 | -1.78055100 | H | -6.45191200 | -0.13783800 | -0.15046200 |
| C                       | 5.16802000  | 0.22193500  | -1.28507600 | H | -6.59326000 | -0.32478200 | -1.91890800 |
| H                       | 6.02958100  | -0.25521400 | -0.80730900 | H | -5.57680200 | 0.97445100  | -1.23498800 |
| H                       | 5.41507300  | 0.37387400  | -2.34446600 | C | -5.18524700 | -2.45157500 | -0.90098800 |
| H                       | 5.01987100  | 1.21617800  | -0.84232900 | H | -5.87497100 | -2.52158200 | -0.04838000 |
| C                       | 3.40724700  | 0.16010200  | 1.10247800  | H | -4.34462800 | -3.13221400 | -0.72501500 |
| H                       | 3.18664600  | 1.08022700  | 0.54674300  | H | -5.72118400 | -2.77513800 | -1.80507400 |
| H                       | 2.59065000  | -0.02137300 | 1.81433400  | C | -2.79408800 | -1.97641300 | -2.47604700 |
| C                       | 4.68836600  | 0.34756300  | 1.90220000  | H | -2.02966900 | -1.69146700 | -3.21215100 |
| H                       | 5.56736800  | 0.55306600  | 1.28188000  | H | -3.34931900 | -2.83849900 | -2.86995800 |
| H                       | 4.53082300  | 1.21675700  | 2.55516900  | H | -2.28620100 | -2.27197400 | -1.54472100 |
| H                       | 4.89900400  | -0.51215400 | 2.55051400  | C | -4.36529800 | -0.34306400 | -3.53866800 |
| C                       | 3.97808800  | -2.21326200 | 0.64890100  | H | -5.07208000 | -1.10909700 | -3.88920500 |
| H                       | 3.49936400  | -3.03643800 | 0.11008300  | H | -3.59400400 | -0.20826000 | -4.30938000 |
| H                       | 3.67217400  | -2.27728100 | 1.70011800  | H | -4.90163400 | 0.60564700  | -3.41649300 |
| C                       | 5.48317100  | -2.38552800 | 0.50249600  | O | -0.18783700 | -2.64904200 | 0.02162100  |
| H                       | 6.07858100  | -1.61410900 | 1.00123200  | O | -0.30561400 | -1.26684400 | 1.84839200  |
| H                       | 5.73448800  | -3.34953300 | 0.96600100  | O | -3.91806100 | -0.64461100 | 0.09104800  |
| H                       | 5.78706300  | -2.44645800 | -0.55040500 | O | -2.89218100 | 0.29353300  | -1.73439300 |
| <b>Initial reactant</b> |             |             |             | C | 3.12884400  | 3.58514900  | -0.24082100 |
| C                       | -3.71265000 | -0.78256300 | -2.24016300 | C | 2.13053400  | 2.82572500  | 0.36895700  |
| C                       | -4.71441600 | -1.01743400 | -1.05639900 | C | 1.42168800  | 1.87163100  | -0.36022800 |
| C                       | -0.24488200 | -2.61133300 | 2.36912900  | C | 1.72112500  | 1.65492200  | -1.72014200 |
| C                       | -0.64870300 | -3.47112700 | 1.11889500  | C | 2.73080600  | 2.42088400  | -2.32383000 |
| B                       | -2.97739400 | 0.24526700  | -0.36707400 | C | 3.42458400  | 3.38197700  | -1.59118600 |
| B                       | -0.11131600 | -1.36243800 | 0.49563600  | H | 3.67268700  | 4.33605000  | 0.33409000  |
| C                       | -2.15818400 | -3.62214100 | 0.97395000  | H | 1.88196300  | 2.98662700  | 1.42125400  |
| H                       | -2.57538600 | -4.24775900 | 1.77478800  | C | 0.26139100  | 1.10964700  | 0.23098900  |
| H                       | -2.37075100 | -4.10916900 | 0.01123700  | C | 1.04077300  | 0.56578500  | -2.41768200 |
| H                       | -2.65901100 | -2.64159800 | 0.98591300  | H | 2.97437400  | 2.24800300  | -3.37457300 |
| C                       | 0.03172400  | -4.82682800 | 1.04085700  | H | 4.20471000  | 3.97287300  | -2.07428500 |
| H                       | -0.31453200 | -5.35921200 | 0.14433200  | C | 0.38319700  | -0.36659600 | -1.69907000 |
| H                       | -0.22491400 | -5.43340700 | 1.92148100  | H | 1.18933100  | 0.42772600  | -3.48815900 |
| H                       | 1.12250000  | -4.72700200 | 0.98373700  | H | 0.00997600  | -1.29261400 | -2.13965100 |
| C                       | 1.19926200  | -2.85725300 | 2.79441800  | C | -1.09043500 | 1.86760500  | -0.02348600 |
| H                       | 1.31626900  | -3.83640700 | 3.27814800  | C | -1.06196800 | 3.22869500  | 0.62688400  |
| H                       | 1.50147100  | -2.07379500 | 3.50260700  | C | -0.63945300 | 4.37033200  | -0.05219400 |
| H                       | 1.86143000  | -2.81680500 | 1.91807000  | C | -1.38265400 | 3.29914000  | 1.99820300  |
|                         |             |             |             | C | -2.41061300 | 1.10436500  | 1.86785900  |

C -0.49495500 5.58305000 0.62299000  
H -0.39313900 4.29952900 -1.11472400  
C -1.22256500 4.52050100 2.67072500  
C -1.96272500 2.11885000 2.63614400  
H -2.99245700 0.27422800 2.27294300  
C -0.77485200 5.65063800 1.98995300  
H -0.15180000 6.46923700 0.08738000  
H -1.46840100 4.58010300 3.73322100  
H -2.14924700 2.11637400 3.70947300  
H -0.65387100 6.59359700 2.52592000  
N -2.19721600 1.07164400 0.49596600  
N 0.18722700 -0.23642800 -0.33028000  
H 0.38045800 1.01429500 1.31969000  
H -1.21637500 1.96122200 -1.11136500  
N 5.88741600 -1.42641900 -0.50774800  
C 5.57861400 -0.98830200 -1.85260500  
H 6.23375500 -1.52736400 -2.56184400  
H 5.86564800 0.07429300 -1.92415200  
C 4.12992800 -1.15247800 -2.32106900  
H 3.42509600 -0.63125800 -1.65845500  
H 4.00575300 -0.74246200 -3.33541700  
H 3.84527800 -2.21534800 -2.35716500  
C 5.59495900 -2.80283900 -0.17020100  
H 5.68304300 -3.39437500 -1.09602800  
H 6.38313900 -3.18204200 0.50666900  
C 4.24066800 -3.08383100 0.49062400  
H 3.40221100 -2.72111800 -0.12213200  
H 4.10942100 -4.16413700 0.65549300  
H 4.18096400 -2.59052800 1.47214700  
C 5.78869000 -0.44347200 0.55067500  
H 6.56857400 0.32492000 0.39429800  
H 6.05150400 -0.94969600 1.49439200  
C 4.44743000 0.28032000 0.70868400  
H 3.61479800 -0.41916000 0.87849800  
H 4.48772200 0.97916800 1.55812200  
H 4.20743300 0.87360900 -0.18718200

**complex B**

C -4.27772100 -0.19262900 -1.48774500  
C -4.74893200 -0.86639600 -0.14335500  
C 0.27399900 -3.07794300 1.42588100  
C 0.10218100 -3.51131200 -0.08782100  
B -2.75605200 0.16079300 0.16419700  
B 1.29901900 -1.53076900 -0.00850700

C -1.28549900 -3.18259800 -0.63624000  
H -2.07178700 -3.79138600 -0.16802000  
H -1.28778500 -3.37845400 -1.71867300  
H -1.51992100 -2.12222500 -0.46916600  
C 0.41168300 -4.97854400 -0.35684300  
H 0.27651200 -5.18786000 -1.42752800  
H -0.26937800 -5.63010000 0.20974100  
H 1.44399800 -5.23350000 -0.08551900  
C 1.13300300 -4.03998600 2.25267400  
H 0.59013500 -4.97401000 2.45404700  
H 1.36094900 -3.55998700 3.21557300  
H 2.07876700 -4.29685100 1.76555900  
C -1.05627600 -2.91533400 2.15669500  
H -0.86283800 -2.55883300 3.17927800  
H -1.57904100 -3.88124000 2.22538500  
H -1.71577400 -2.20039100 1.65234100  
C -5.80004100 -0.04250100 0.59488900  
H -5.94705600 -0.47416900 1.59431300  
H -6.76186400 -0.04919800 0.06494100  
H -5.47056400 0.99975300 0.71444300  
C -5.20973000 -2.30530100 -0.29268800  
H -5.51006100 -2.69804100 0.68862700  
H -4.40892300 -2.94018600 -0.69112600  
H -6.07646500 -2.36155400 -0.96696900  
C -3.73661700 -1.18755700 -2.50837800  
H -3.26578100 -0.62651400 -3.32763400  
H -4.53985000 -1.81018500 -2.92516800  
H -2.97815800 -1.84100900 -2.06021900  
C -5.32396900 0.69825400 -2.13840700  
H -6.21952000 0.11342200 -2.39317400  
H -4.91513400 1.12225900 -3.06588700  
H -5.61522400 1.52486400 -1.47952900  
O 1.04128500 -2.70110800 -0.78700400  
O 0.92431700 -1.80900200 1.34357100  
O -3.55339200 -0.83578000 0.66552000  
O -3.17269000 0.62584900 -1.05662000  
C 2.92652500 3.93675000 -1.19047400  
C 2.34182300 2.99175100 -0.34755000  
C 1.47309000 2.02579400 -0.85741900  
C 1.20392100 1.97152800 -2.24338700  
C 1.78648700 2.94070800 -3.08104300  
C 2.63279800 3.91432500 -2.55843500  
H 3.58979400 4.70047100 -0.78199400  
H 2.53115100 3.02508700 0.72959400

|               |             |             |              |             |             |
|---------------|-------------|-------------|--------------|-------------|-------------|
| C 0.68792600  | 1.05552500  | -0.00094300 | C 5.04424300 | -3.02548700 | 0.07083000  |
| C 0.43663600  | 0.84050400  | -2.74463100 | H 5.79809000 | -2.33403900 | 0.46297100  |
| H 1.58278300  | 2.90944700  | -4.15390600 | H 5.24646500 | -4.01666800 | 0.50053000  |
| H 3.07683400  | 4.65803200  | -3.22277200 | H 5.17696500 | -3.11164500 | -1.01583900 |
| C 0.32147800  | -0.26000200 | -1.94964300 |              |             |             |
| H 0.13772700  | 0.79931800  | -3.79157100 |              |             |             |
| H 0.00589200  | -1.22504100 | -2.35359200 |              |             |             |
| C -0.75091400 | 1.65866200  | 0.19442700  |              |             |             |
| C -0.63790800 | 2.93452000  | 0.99601600  |              |             |             |
| C -0.52165900 | 4.19215300  | 0.40596200  |              |             |             |
| C -0.55411600 | 2.80158900  | 2.39775400  |              |             |             |
| C -1.46245600 | 0.55755800  | 2.23003600  |              |             |             |
| C -0.28032400 | 5.32239000  | 1.18825700  |              |             |             |
| H -0.58735500 | 4.27886500  | -0.68176500 |              |             |             |
| C -0.29853100 | 3.94221100  | 3.17516600  |              |             |             |
| C -0.85319100 | 1.49749200  | 2.98544900  |              |             |             |
| H -1.89007000 | -0.34600300 | 2.66518600  |              |             |             |
| C -0.15476800 | 5.19063400  | 2.57372900  |              |             |             |
| H -0.17515500 | 6.30084700  | 0.71730900  |              |             |             |
| H -0.23170100 | 3.84394600  | 4.26099900  |              |             |             |
| H -0.73224000 | 1.34242600  | 4.05717500  |              |             |             |
| H 0.04478100  | 6.06926400  | 3.18970700  |              |             |             |
| N -1.64369400 | 0.72129800  | 0.86378700  |              |             |             |
| N 0.67642500  | -0.26298700 | -0.62360100 |              |             |             |
| H 1.12277600  | 0.96892100  | 1.00190700  |              |             |             |
| H -1.16835400 | 1.86525400  | -0.79880900 |              |             |             |
| N 3.06443800  | -1.34885700 | -0.02517400 |              |             |             |
| C 3.45238500  | -1.04167000 | -1.43602300 |              |             |             |
| H 2.67836200  | -0.38176500 | -1.84102100 |              |             |             |
| H 3.37846900  | -1.99109200 | -1.98497700 |              |             |             |
| C 4.79285900  | -0.36108700 | -1.68305500 |              |             |             |
| H 5.65890000  | -0.93377500 | -1.33265600 |              |             |             |
| H 4.89888000  | -0.22411100 | -2.76829400 |              |             |             |
| H 4.82212900  | 0.63915800  | -1.22766000 |              |             |             |
| C 3.40030200  | -0.25102100 | 0.93338400  |              |             |             |
| H 3.20944900  | 0.68977000  | 0.40679200  |              |             |             |
| H 2.67142700  | -0.33867600 | 1.75035400  |              |             |             |
| C 4.79544600  | -0.21430700 | 1.54508600  |              |             |             |
| H 5.59587700  | -0.11128200 | 0.80340900  |              |             |             |
| H 4.83808800  | 0.66403500  | 2.20426200  |              |             |             |
| H 4.99922000  | -1.09660500 | 2.16576900  |              |             |             |
| C 3.61127400  | -2.65956500 | 0.43702000  |              |             |             |
| H 2.95192900  | -3.42051300 | 0.00618800  |              |             |             |
| H 3.47002200  | -2.67883800 | 1.52473200  |              |             |             |

## 6.) References

- [1] S.-F. Jin, H. T. Dang, G. C. Haug, R. He, V. D. Nguyen, V.T. Nguyen, H. D. Arman, K. S. Schanze, O. V. Larionov, *J. Am. Chem. Soc.*, 2020, **142**, 1603-1613.
- [2] K. Chen, M. S. Cheung, Z.-Y. Lin, P.-F Li, *Org. Chem. Front.*, 2016, **3**, 875-879.
- [3] P. B. Dzhevakov, M. A. Topchiy, D. A. Zharkova, O. S. Morozov, A. F. Asachenko, M. S Nechaev, *Adv. Synth. Catal.*, 2016, **358**, 977-983.
- [4] E. M. Kwon, C. G. Kim, A. R. Goh, J. S. Park, J. G. Jun, *Bull. Korean Chem. Soc.*, **2012**, **33**, 1939-1944.
- [5] C. A. Malapit, M. Borrell, M. W. Milbauer, C. E. Brigham, M. S. Sanford, *J. Am. Chem. Soc.* 2020, **142**, 5918-5923.
- [6] H. Murakami, T. Minami, F. Ozawa, *J. Org. Chem.*, 2004, **69**, 4482-4486.
- [7] L. Zhang, L. Jiao, *J Am Chem Soc.*, 2017, **139**, 607-610.
- [8] O. B. D. Chem, P. Knochel, *Angew. Chem. Int. Ed.*, 2005, **44**, 3133-3135.
- [9] T. Ishiyama, J. Takagi, K. Ishida, N. Miyaura, N. R. Anastasi, J. F. Hartwig, *J. Am. Chem. Soc.*, 2002, **124**, 5359-5363.
- [10] M. J. Waring, A. M. Birch, S. Birtles, L. K. Buckett, R. J. Butlin, L. Campbell, P. M. Gutierrez, P. D. Kemmitt, A. G. Leach, P. A. MacFaul, C. O'Donnell, A. V. Turnbull, *Med. Chem. Commun.*, 2013, **4**, 159-164.
- [11] G.-H Wang, L. Xu, P.-F. Li, *J Am Chem Soc.*, 2015, **137**, 8058-8061.
- [12] B. Li, A. E. Wendlandt, S. S. Stahl, *Org. Lett.*, 2019, **21**, 1176-1181.
- [13] F. V. Prazeres, C. S. Sixto, L. Castedo, H. Lamb, A. R. Hawkins, A. R. Tunnicliffe, J. R. Coggins, A. J. Laphorn, C. G. Bello, *Chem Med Chem.*, 2007, **2**, 194-207.
- [14] H. B. Chandrashekar, A. Maji, G. Halder, S. Banerjee, S. Bhattacharyya, D. Maiti, *Chem Commun (Camb)*, 2019, **55**, 6201-6204.
- [15] D. L. J. Clive, R. Sunasee, *Org, Lett*, 2007, **9**, 2677-2680.
- [16] J. B. McManus, D. A. Nicewicz, *J Am Chem Soc.*, 2017, **139**, 2880-2883
- [17] Y. Uetake, T. Niwa, T. Hosoya, *Org, Lett*, 2016, **18**, 2758-2761.
- [18] R. Mir, T. Dudding, *J. Org. Chem.*, 2017, **82**, 709-714.
- [19] A. Nitelet, D., Thevenet, B. Schiavi, C. Hardouin, J. Fournier, R. Tamion, X. Pannecoucke, P. Jubault, T. Poisson. *Chem. -Eur. J.*, 2019, **25**, 3262-3266.
- [20] D.-P. Chen, G.-Q. Xu, Q.-H. Zhou, L.-W. Chung, W.-J Tang, *J Am Chem Soc.*, 2017, **139**, 9767-9770.
- [21] O. V. Dolomanov, L. J. Bourhis, R. J, Gildea, J. A. K. Howard, H. J. Puschmann, *Appl. Cryst.*, 2009, **42**, 339-341.
- [22] G.M. Sheldrick, *Acta Cryst.*, 2015, **A71**, 3-8.
- [23] G. M. Sheldrick, *Acta Cryst.*, 2015, **C71**, 3-8.
- [24] M. J. Frisch, *et al. Gaussian 16 Rev. C.01*, Wallingford, CT, 2016.
- [25] Y. Zhao, D. G. Truhlar, *Theor. Chem. Account.*, 2008, **120**, 215-241.
- [26] F. Weigend, R. Ahlrichs, *Phys. Chem. Chem. Phys.*, 2005, **7**, 3297-3305.
- [27] J. Tomasi, B. Mennucci, R. Cammi, *Chem. Rev.*, 2005, **105**, 2999-3094.
- [28] G. Scalmani, M. J. Frisch, B. Mennucci, J. Tomasi, R. Cammi, V. Barone, *J. Chem. Phys.* 2006, **124**, 094107.
- [29] C. Adamo, D. Jacquemin, *Chem. Soc. Rev.*, 2013, **42**, 845-856.
- [30] R. Bauernschmitt, R. Ahlrichs, *Chem. Phys. Lett.* 1996, **256**, 454-464.
- [31] B. L. Buss, C.-H. Lim, G. M. Miyake, *Angew. Chem. Int. Ed.*, 2020, **59**, 3209-3217.

## 7.) NMR Spectroscopic Data

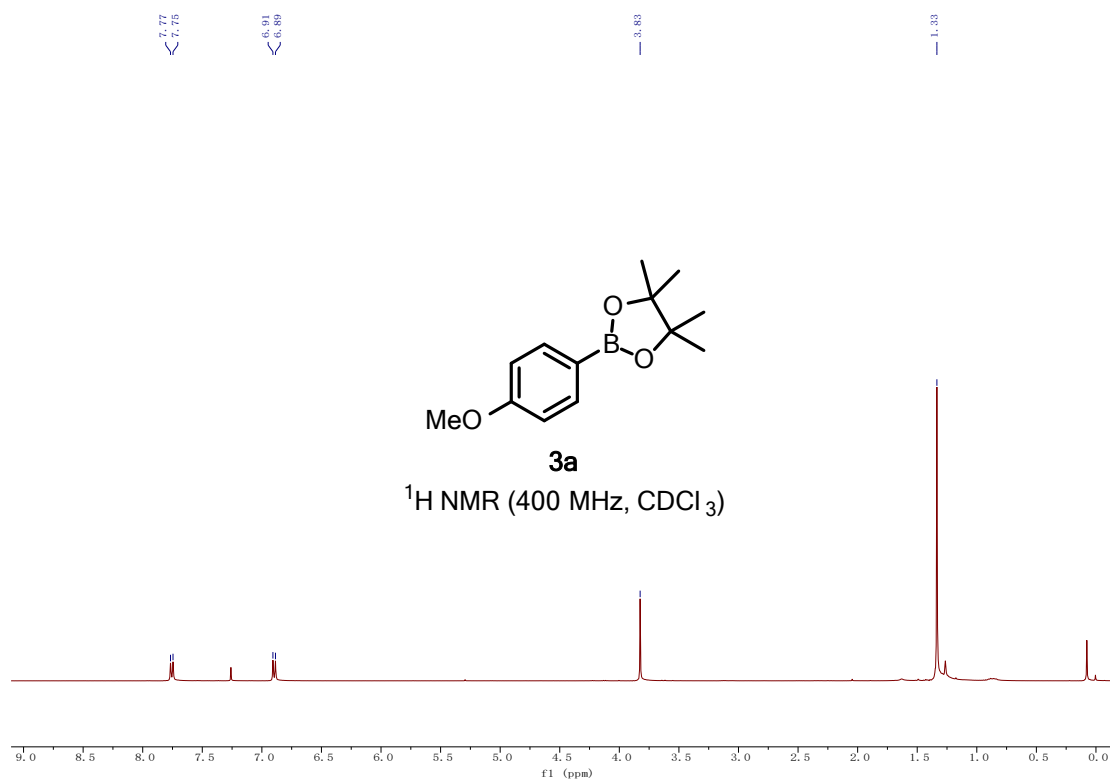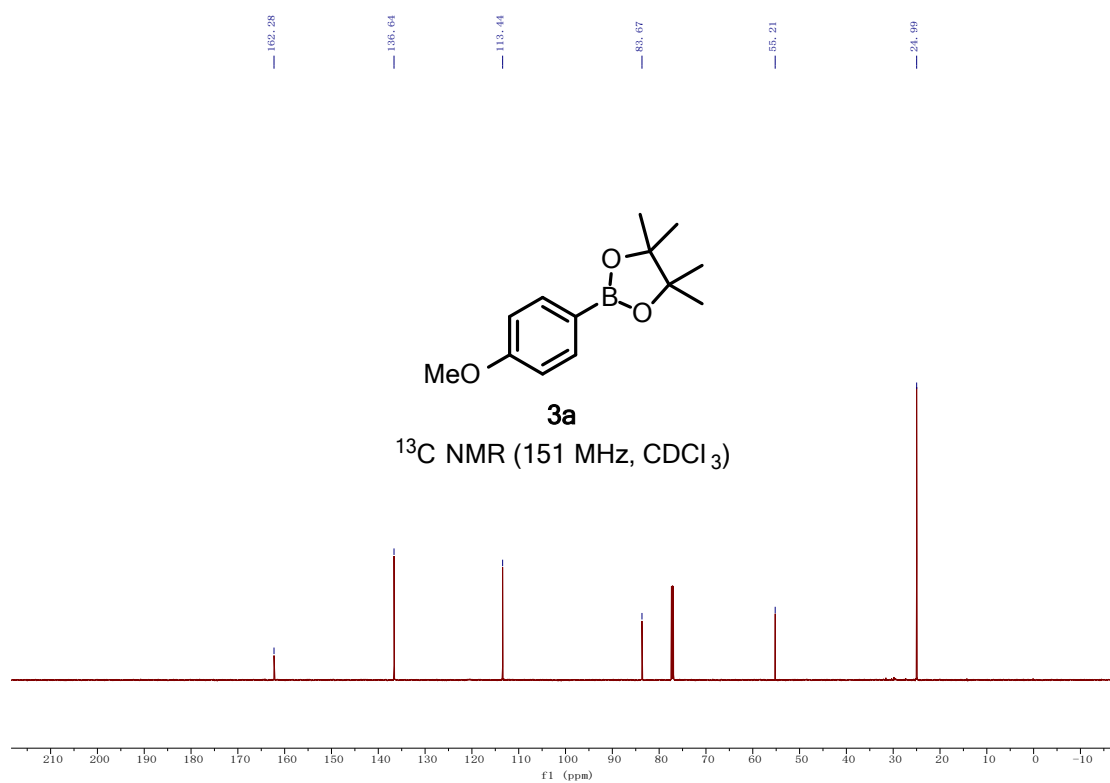

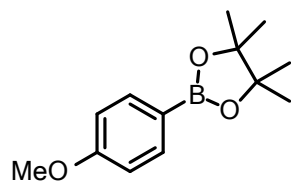

**3a**

$^{11}\text{B}$  NMR (128 MHz,  $\text{CDCl}_3$ )

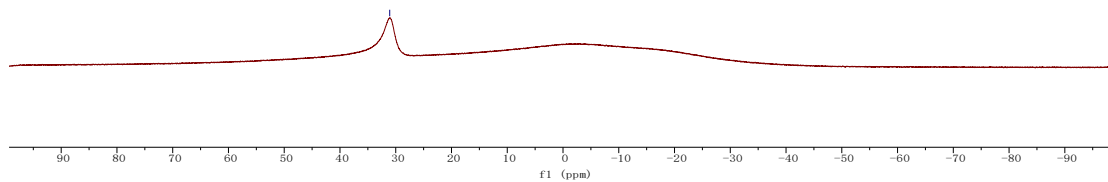

7.73  
7.71

7.01  
7.19

2.38

1.35

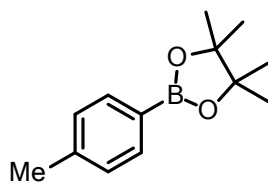

**3b**

$^1\text{H}$  NMR (400 MHz,  $\text{CDCl}_3$ )

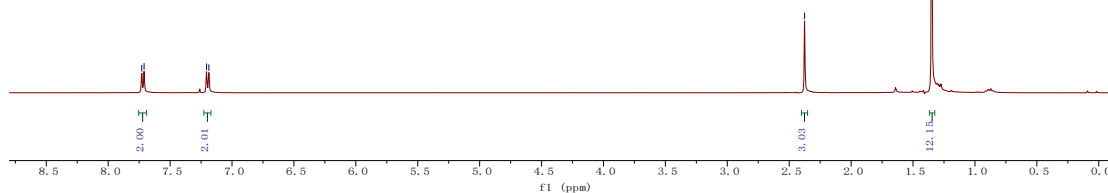

141.53

134.95

128.06

83.76

25.00

21.86

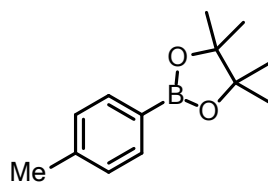

**3b**

<sup>13</sup>C NMR (151 MHz, CDCl<sub>3</sub>)

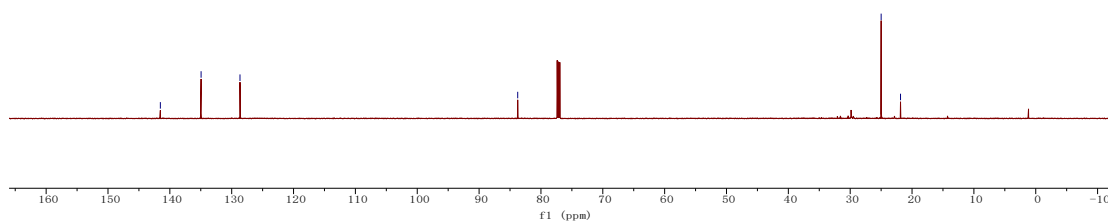

30.97

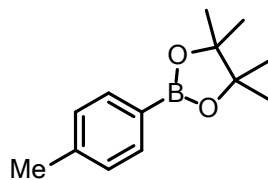

**3b**

<sup>11</sup>B NMR (193 MHz, CDCl<sub>3</sub>)

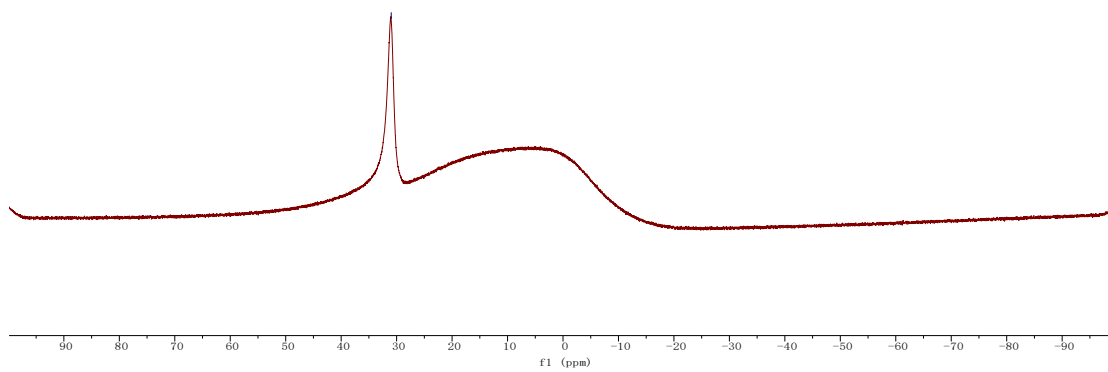

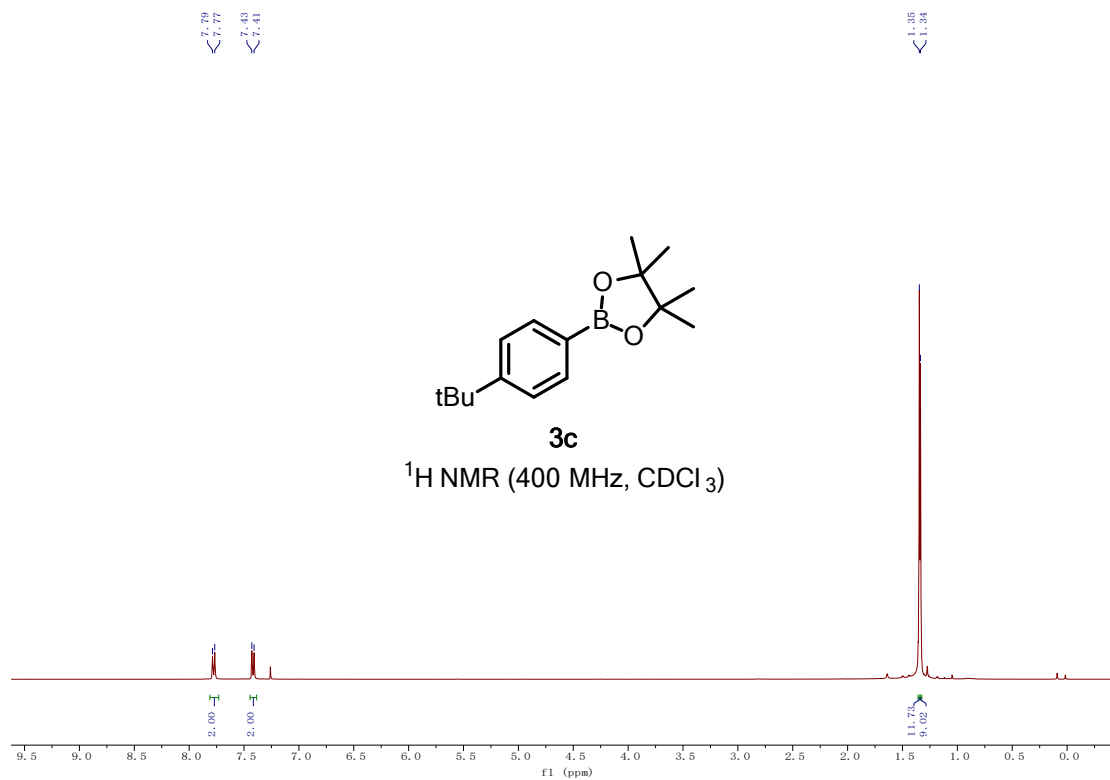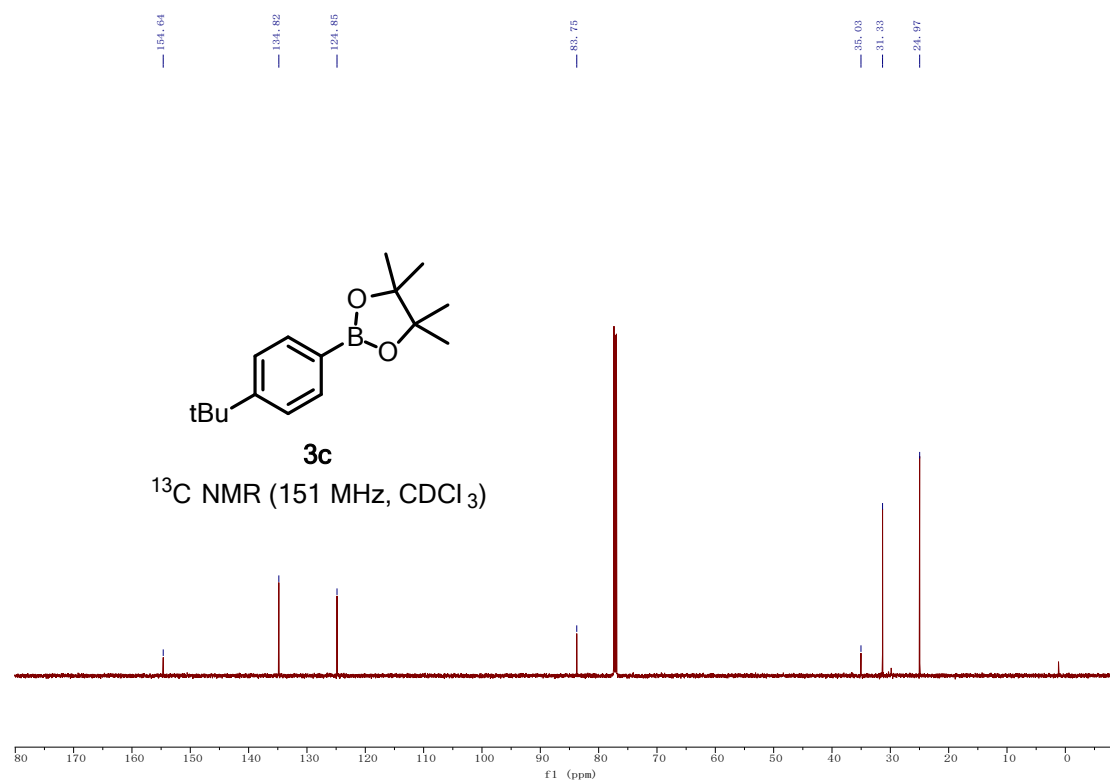



30.89

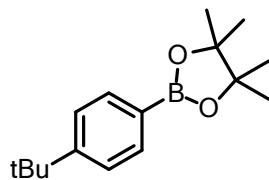

**3c**

$^{11}\text{B}$  NMR (128 MHz,  $\text{CDCl}_3$ )

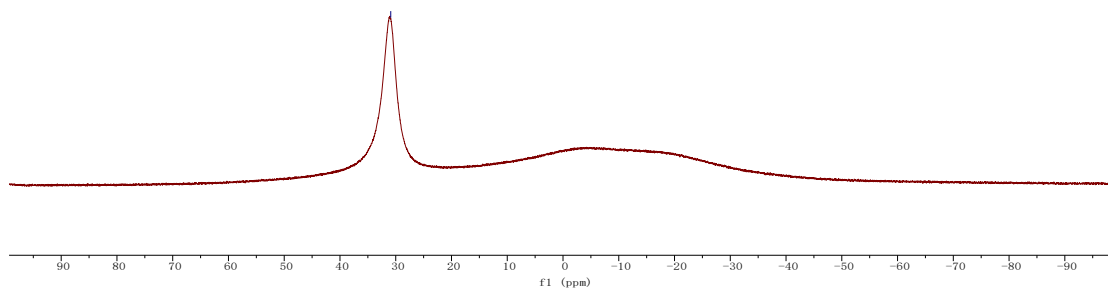

7.70  
7.68

6.71  
6.69

3.99

1.32

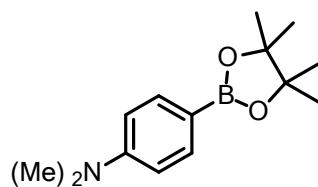

**3d**

$^1\text{H}$  NMR (400 MHz,  $\text{CDCl}_3$ )

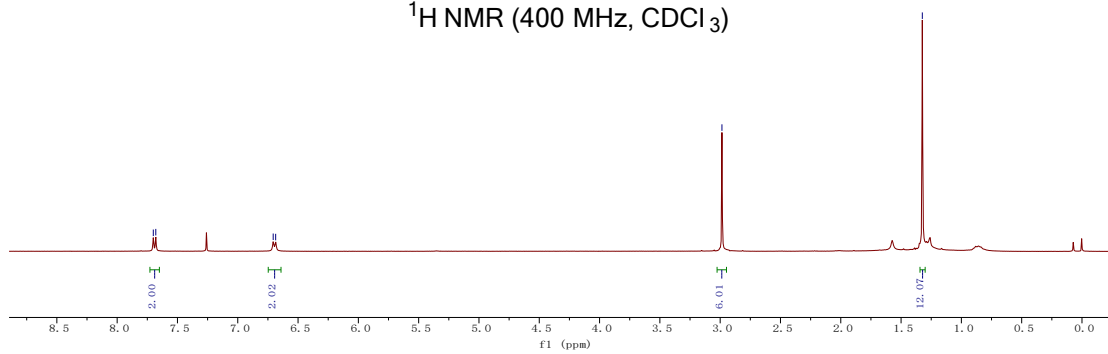

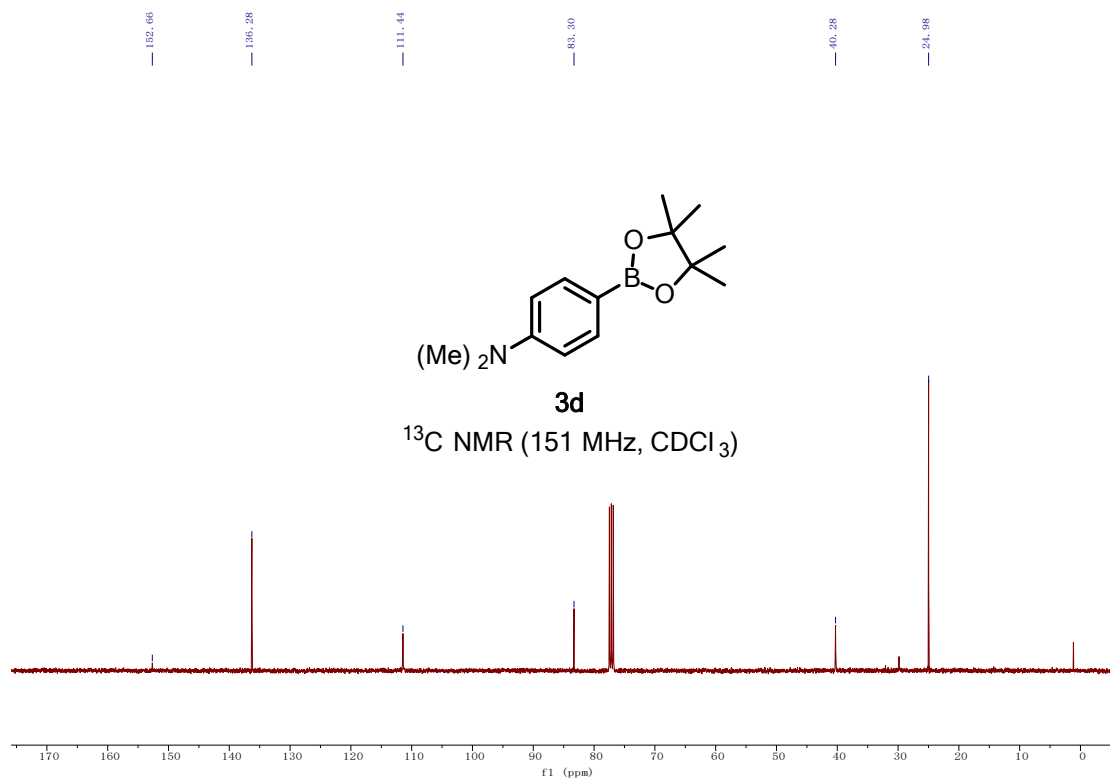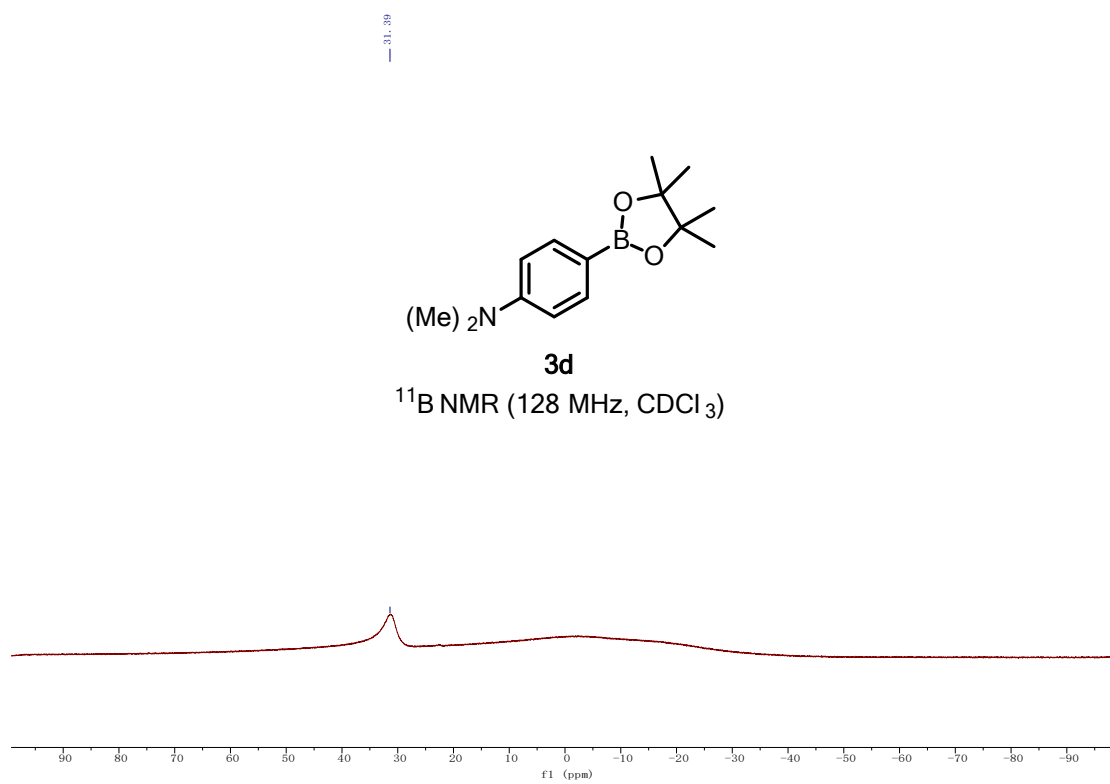

7.71  
7.70

7.24  
7.22

2.49

1.34

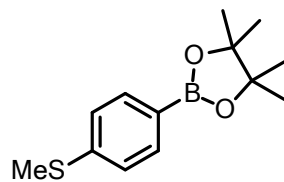

**3e**

<sup>1</sup>H NMR (400 MHz, CDCl<sub>3</sub>)

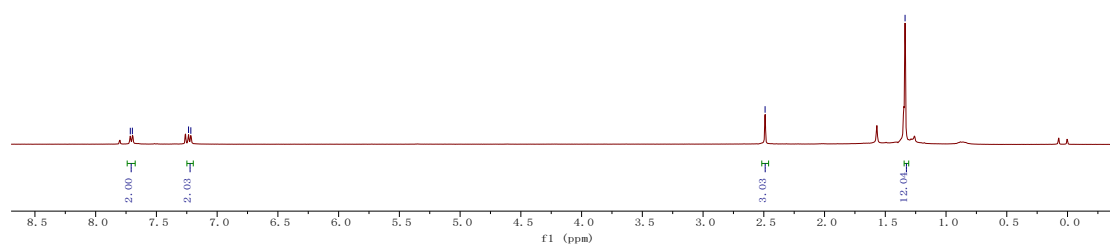

142.69

135.19

125.11

83.84

24.97

15.16

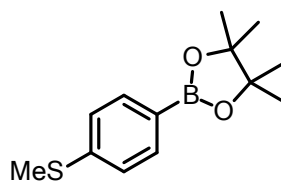

**3e**

<sup>13</sup>C NMR (151 MHz, CDCl<sub>3</sub>)

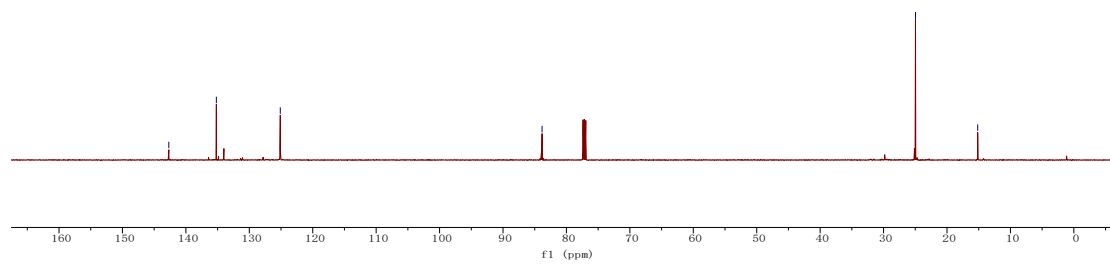



160.33  
156.08  
136.77  
129.94  
123.80  
119.61  
117.81  
83.87  
25.00

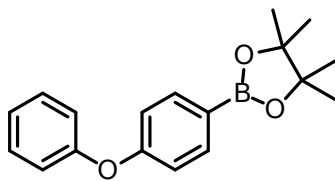

**3f**

<sup>13</sup>C NMR (101 MHz, CDCl<sub>3</sub>)

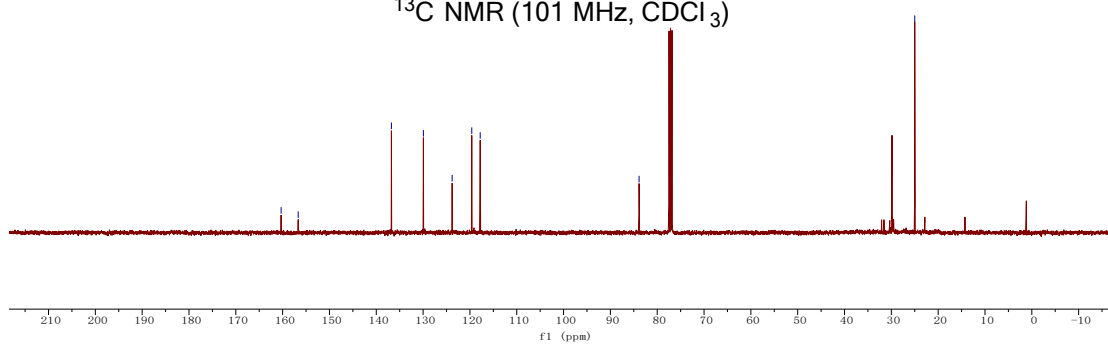

7.82  
7.80  
7.49  
7.47  
7.46  
7.38  
7.36

1.36

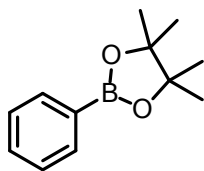

**3g**

<sup>1</sup>H NMR (400 MHz, CDCl<sub>3</sub>)

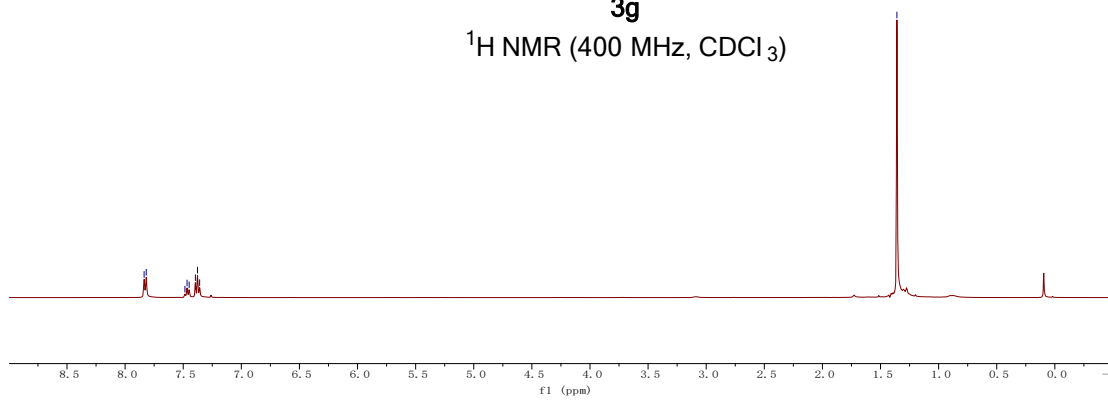

134.86  
131.38  
127.83

83.89

46.00

24.99

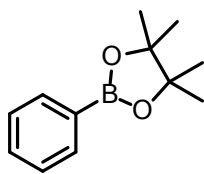

**3g**

$^{13}\text{C}$  NMR (151 MHz,  $\text{CDCl}_3$ )

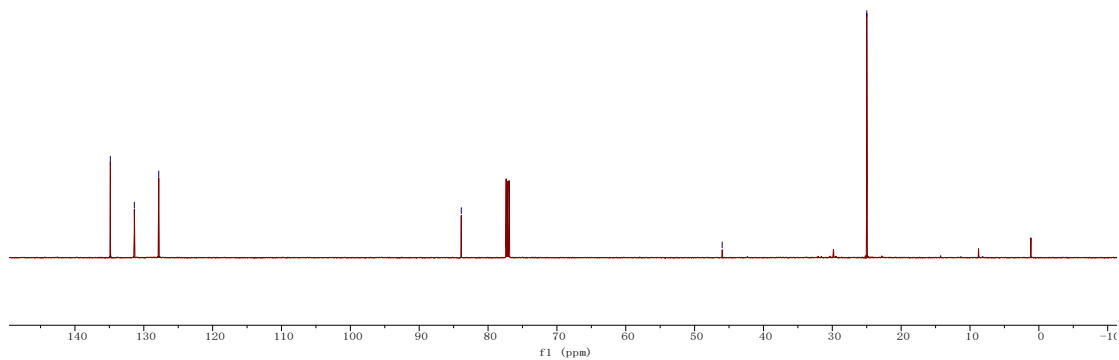

31.03

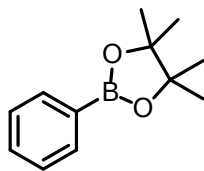

**3g**

$^{11}\text{B}$  NMR (193 MHz,  $\text{CDCl}_3$ )

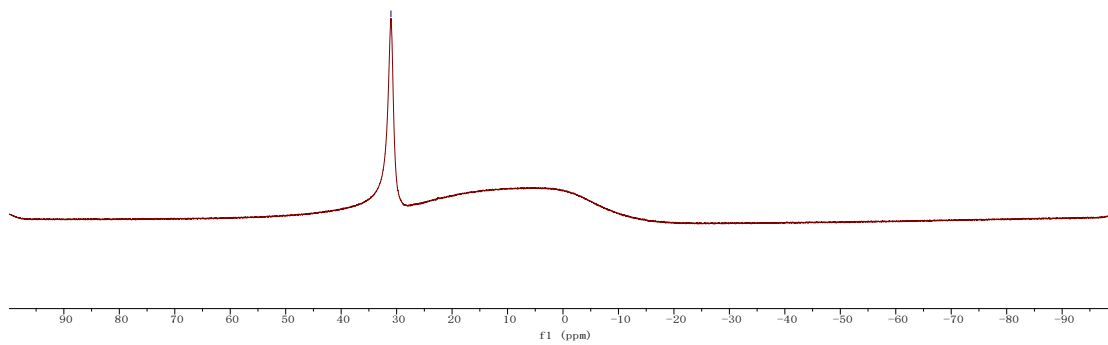

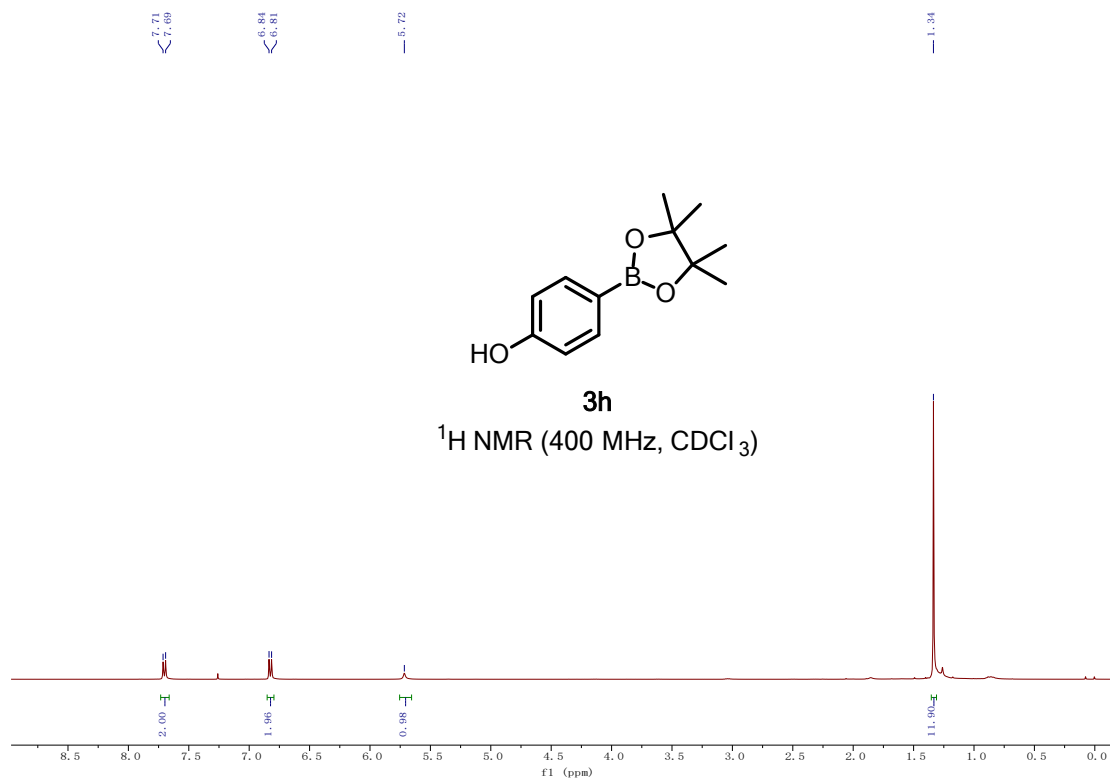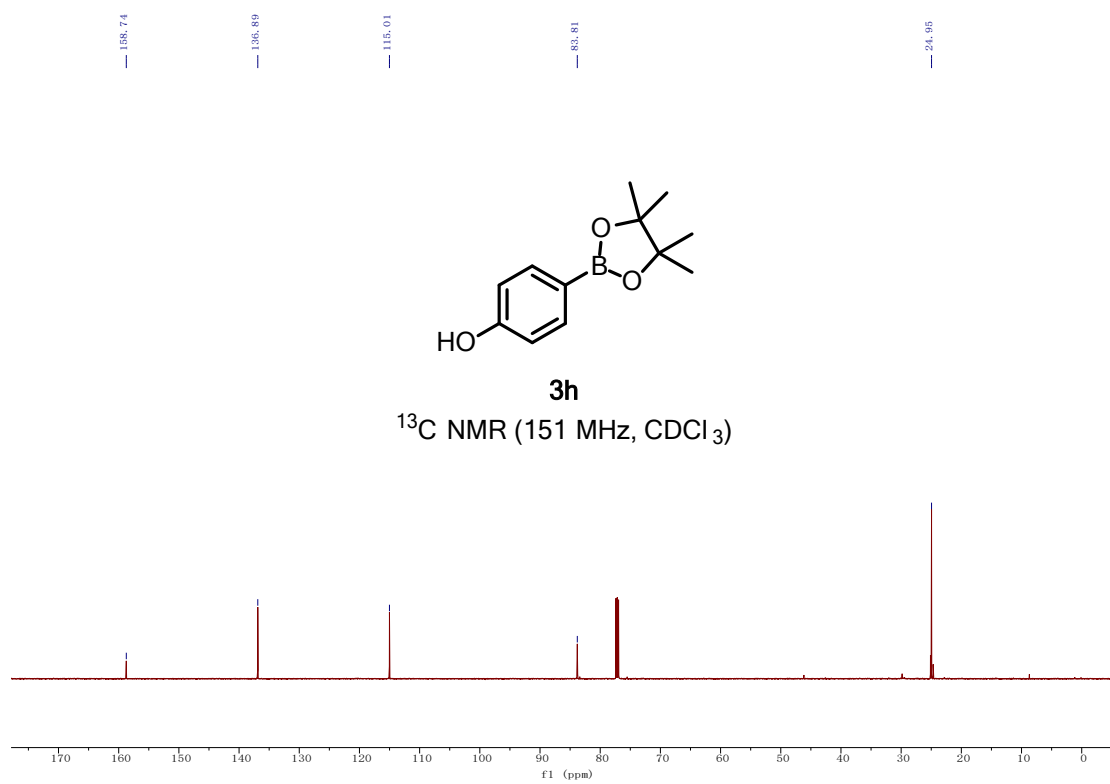

— 30.97

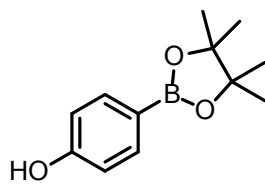

**3h**

$^{11}\text{B}$  NMR (128 MHz,  $\text{CDCl}_3$ )

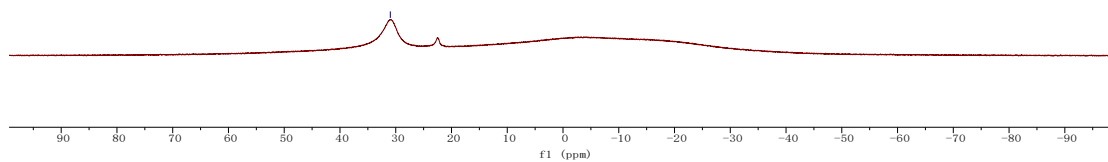

7.63  
7.61

6.67  
6.65

3.73

1.32

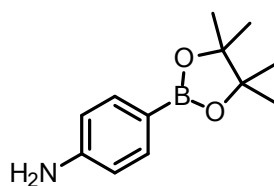

**3i**

$^1\text{H}$  NMR (400 MHz,  $\text{CDCl}_3$ )

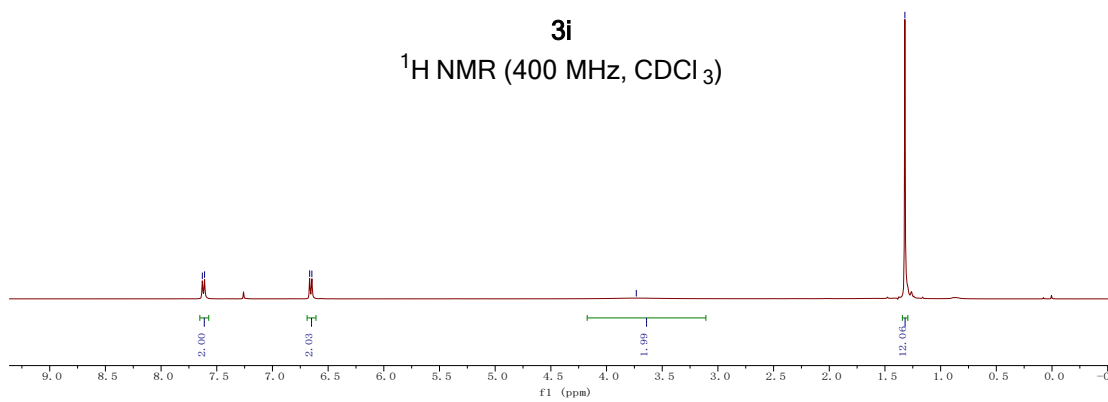



149.41  
136.53  
114.21  
83.42  
24.97

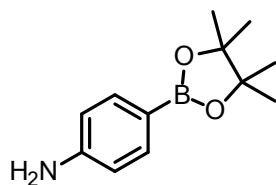

**3i**

$^{13}\text{C}$  NMR (101 MHz,  $\text{CDCl}_3$ )

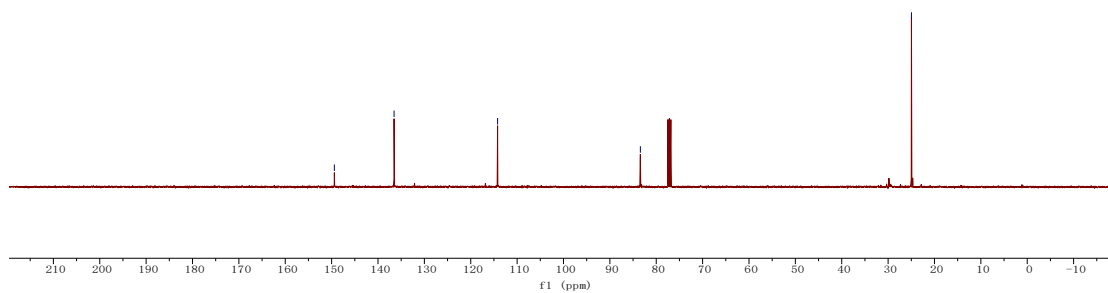

30.86

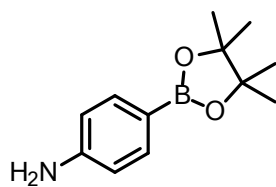

**3i**

$^{11}\text{B}$  NMR (128 MHz,  $\text{CDCl}_3$ )

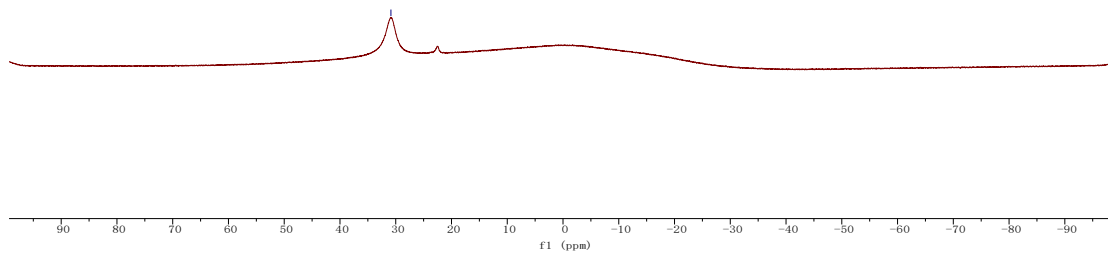

7.81  
7.79  
7.78  
7.07  
7.05  
7.02

1.34

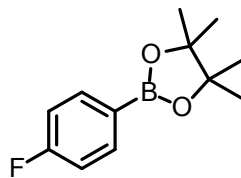

**3j**

<sup>1</sup>H NMR (400 MHz, CDCl<sub>3</sub>)

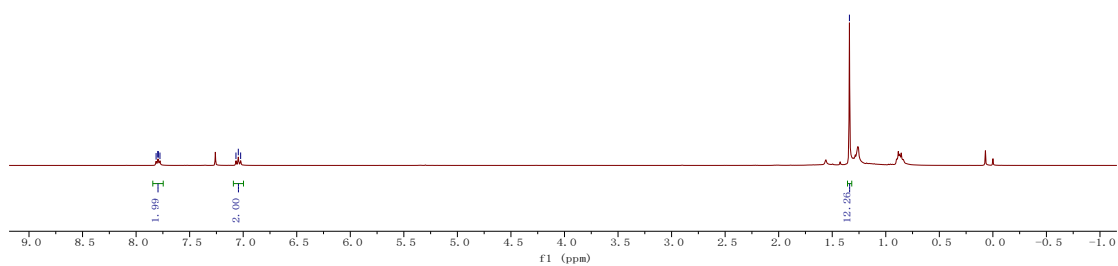

168.07  
164.41

137.15  
137.09

118.04  
114.91

81.04

24.99

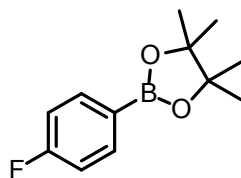

**3j**

<sup>13</sup>C NMR (151 MHz, CDCl<sub>3</sub>)

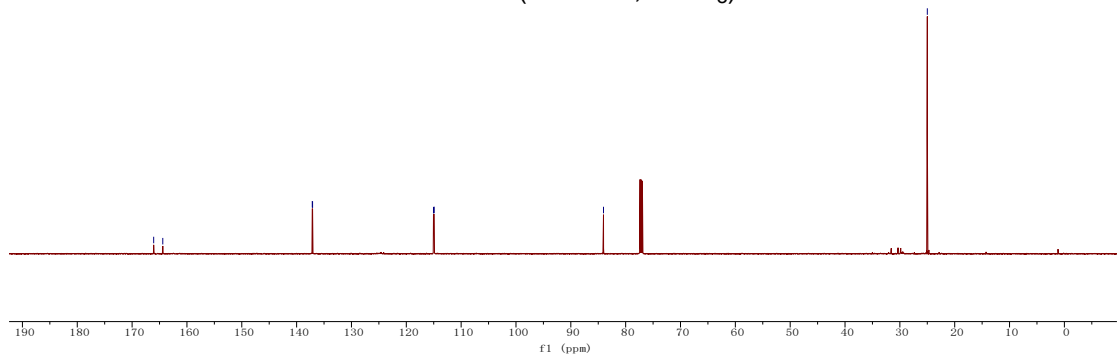

30.66

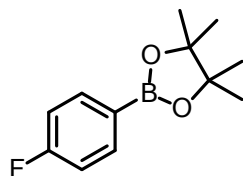

**3j**

$^{11}\text{B}$  NMR (128 MHz,  $\text{CDCl}_3$ )

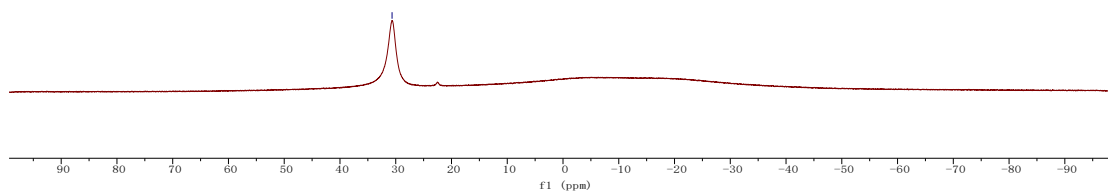

108.34  
108.36  
108.37  
108.38  
108.39  
108.40  
108.42

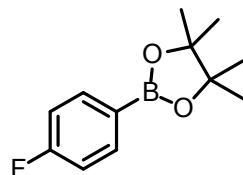

**3j**

$^{19}\text{F}$  NMR (377 MHz,  $\text{CDCl}_3$ )

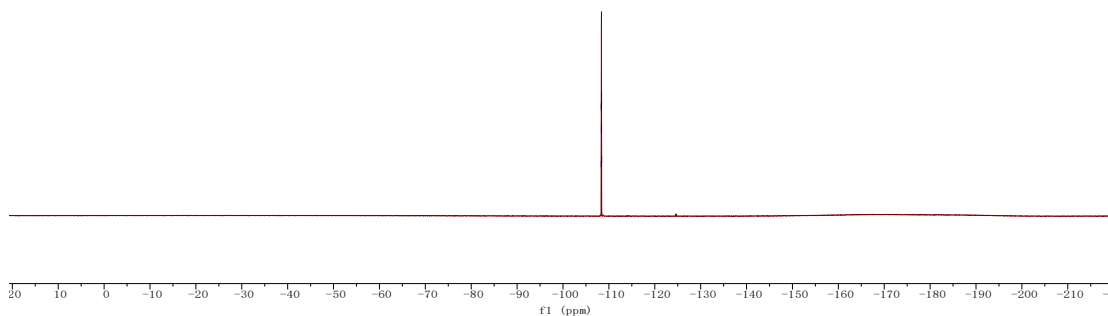

7.92  
7.90  
7.62  
7.60

1.38

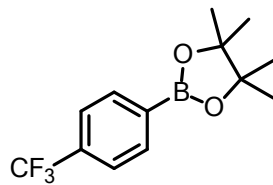

**3k**

$^1\text{H}$  NMR (400 MHz,  $\text{CDCl}_3$ )

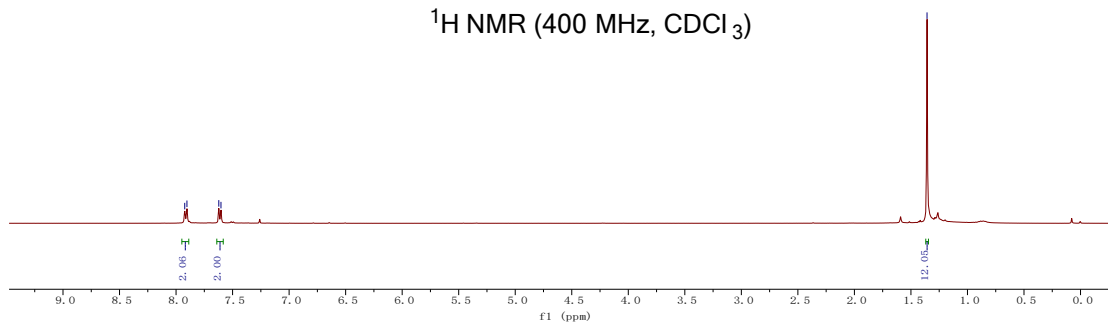

135.15  
131.09  
128.96  
124.48  
124.46

84.42

25.01

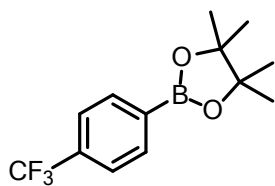

**3k**

$^{13}\text{C}$  NMR (151 MHz,  $\text{CDCl}_3$ )

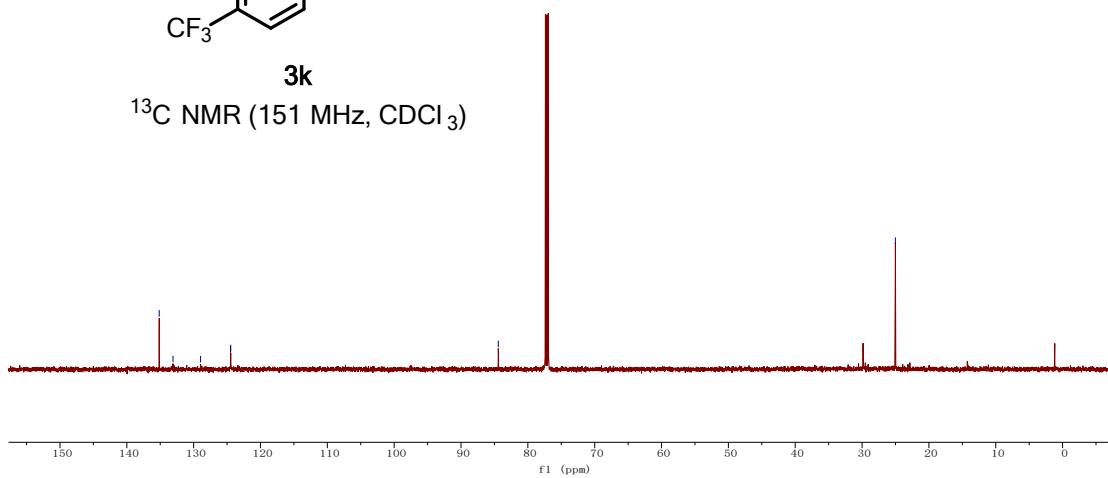

30.61

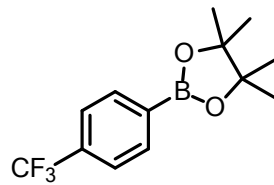

**3k**

$^{11}\text{B}$  NMR (128 MHz,  $\text{CDCl}_3$ )

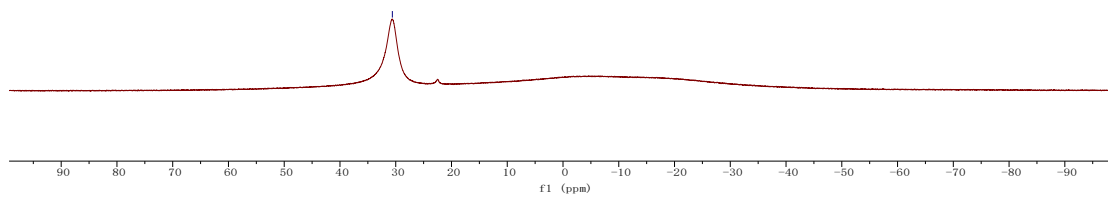

-63.00

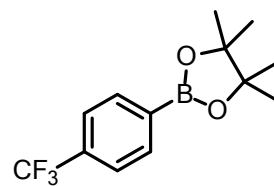

**3k**

$^{19}\text{F}$  NMR (377 MHz,  $\text{CDCl}_3$ )

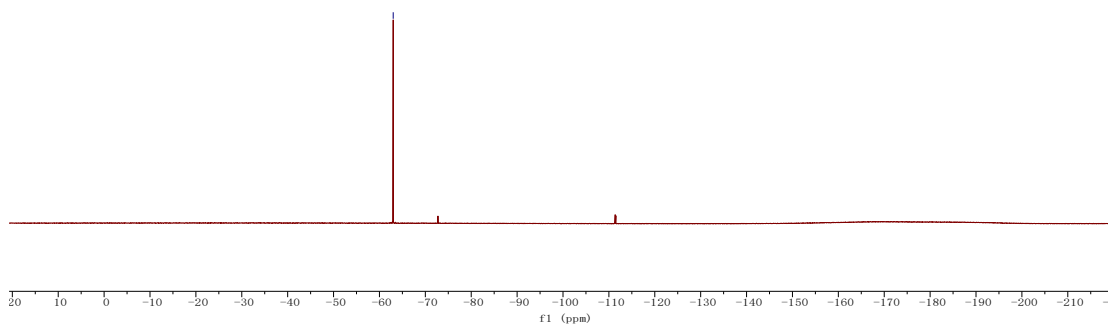

< 7.82  
< 7.80

< 7.10  
< 7.08

> 6.72  
> 6.54  
> 6.36

— 1.34

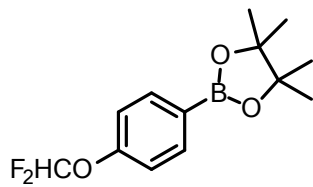

**3l**

$^1\text{H}$  NMR (400 MHz,  $\text{CDCl}_3$ )

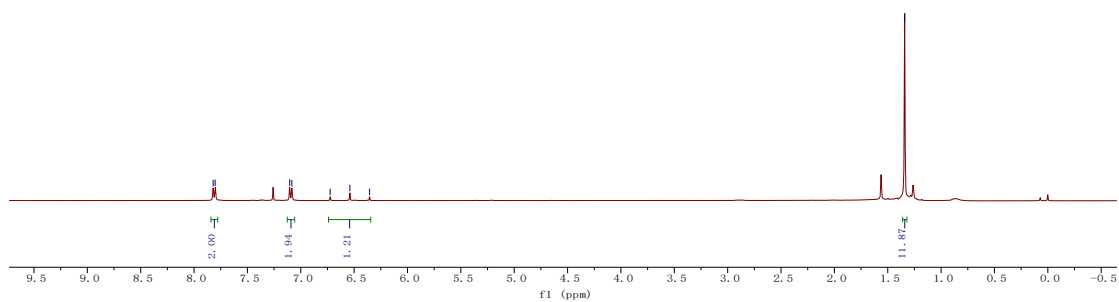

— 30.91

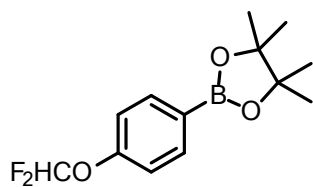

**3l**

$^{11}\text{B}$  NMR (128 MHz,  $\text{CDCl}_3$ )

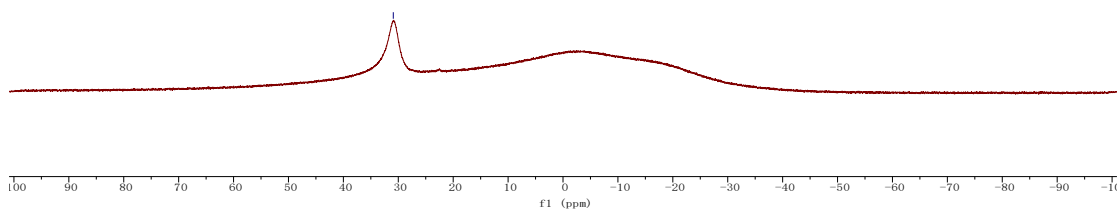

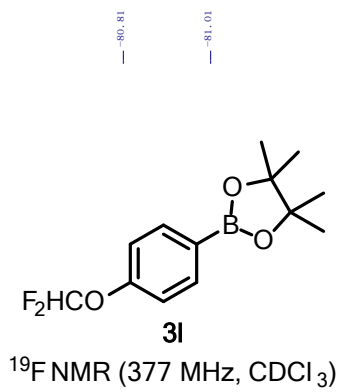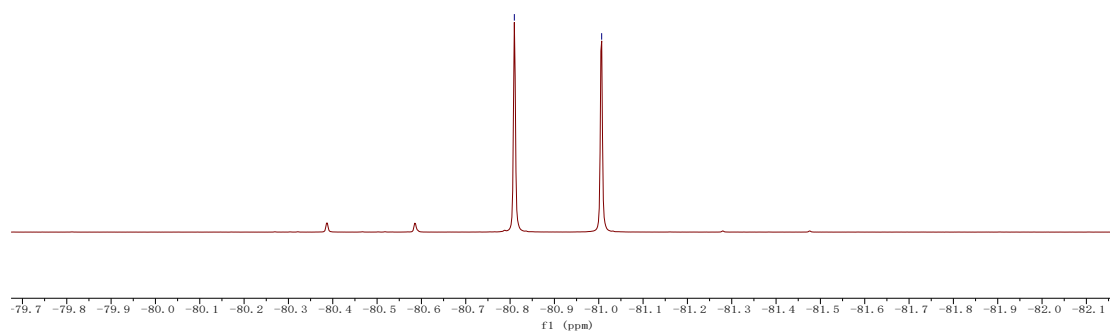

7.88  
7.87  
7.65  
7.65

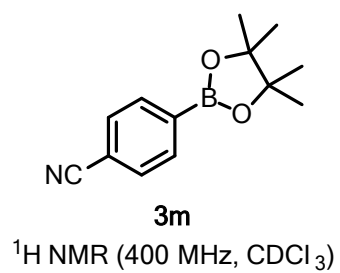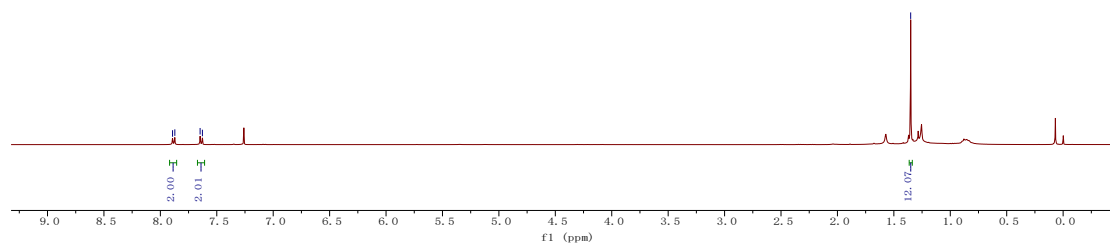

30.49

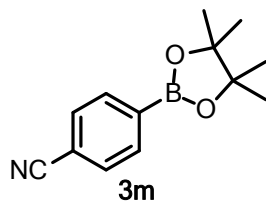

$^{11}\text{B}$  NMR (193 MHz,  $\text{CDCl}_3$ )

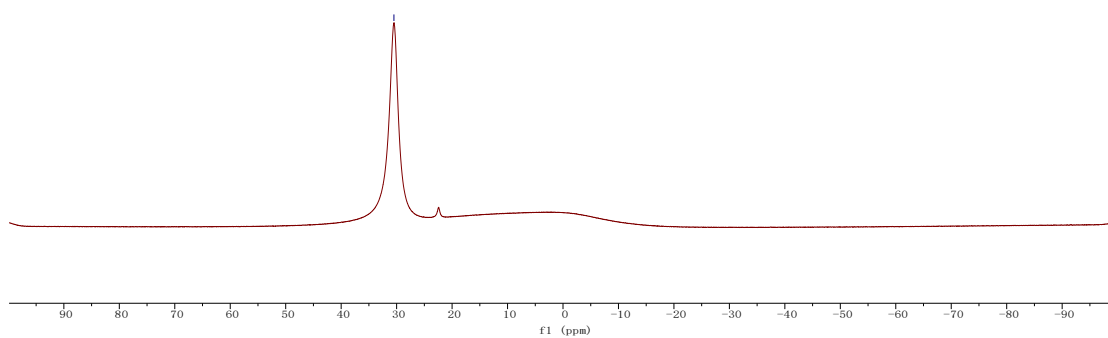

8.20  
8.18  
7.94  
7.94  
7.46  
7.46  
7.42  
7.42  
7.30  
7.28  
7.28  
7.24  
7.22

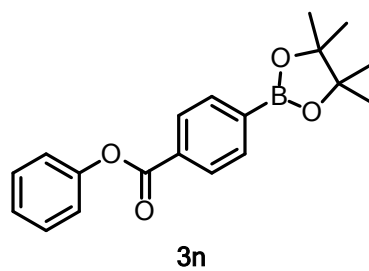

$^1\text{H}$  NMR (400 MHz,  $\text{CDCl}_3$ )

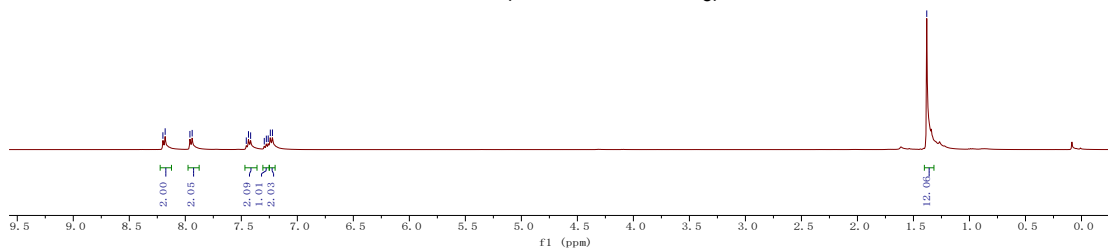

1.38



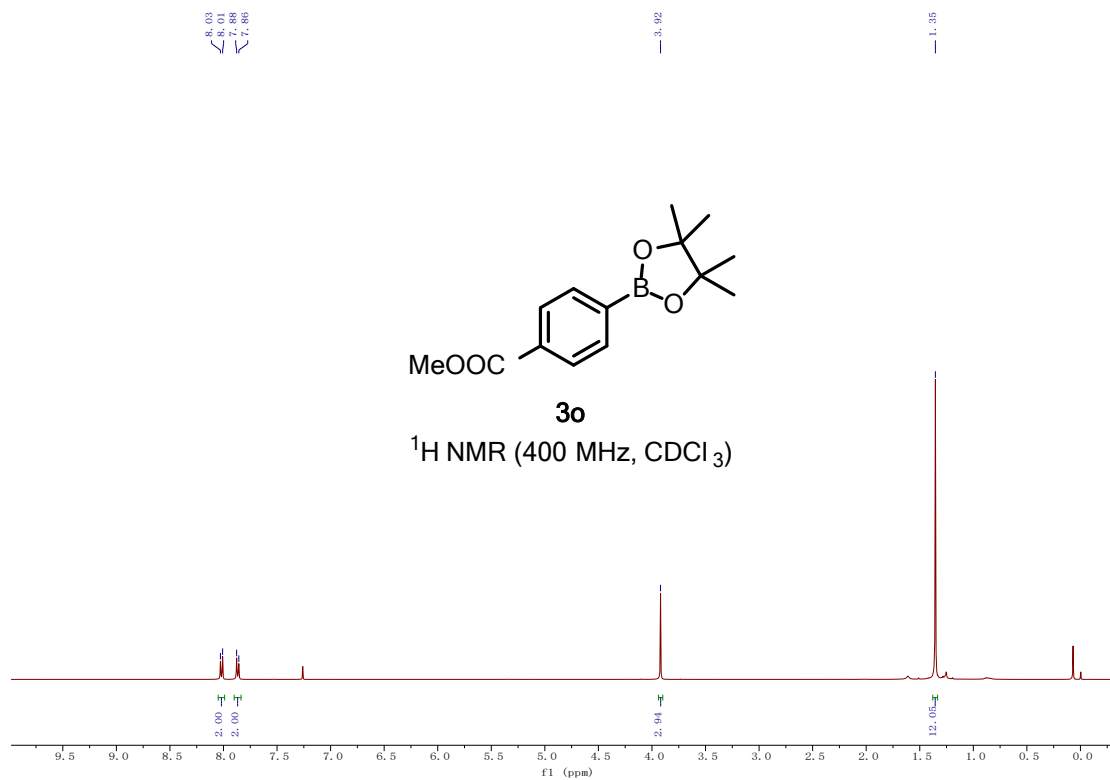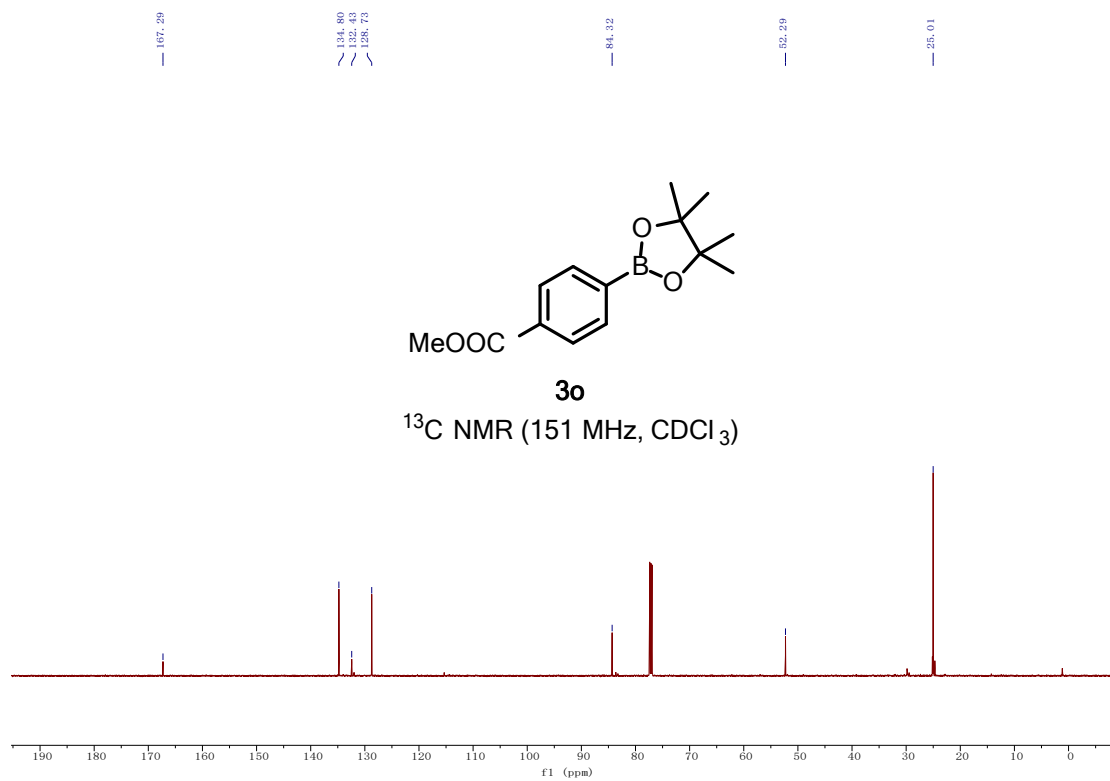

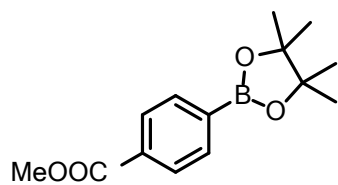

**3o**

$^{11}\text{B}$  NMR (128 MHz,  $\text{CDCl}_3$ )

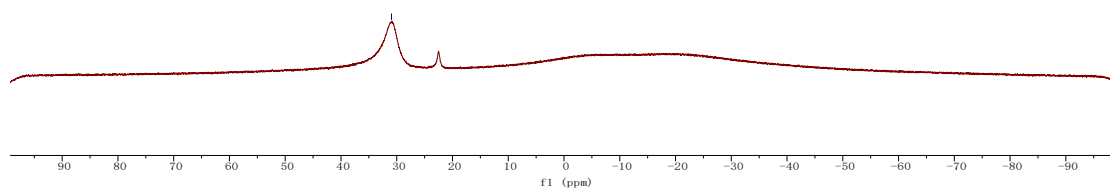

7.76  
7.74  
6.92  
6.10  
6.09  
6.08  
6.05  
6.05  
6.02  
6.01  
5.43  
5.39  
5.39  
5.30  
5.29  
5.27  
4.57  
4.56  
1.33

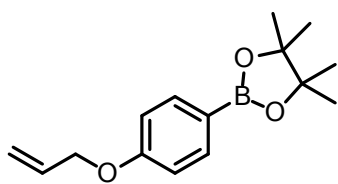

**3p**

$^1\text{H}$  NMR (400 MHz,  $\text{CDCl}_3$ )

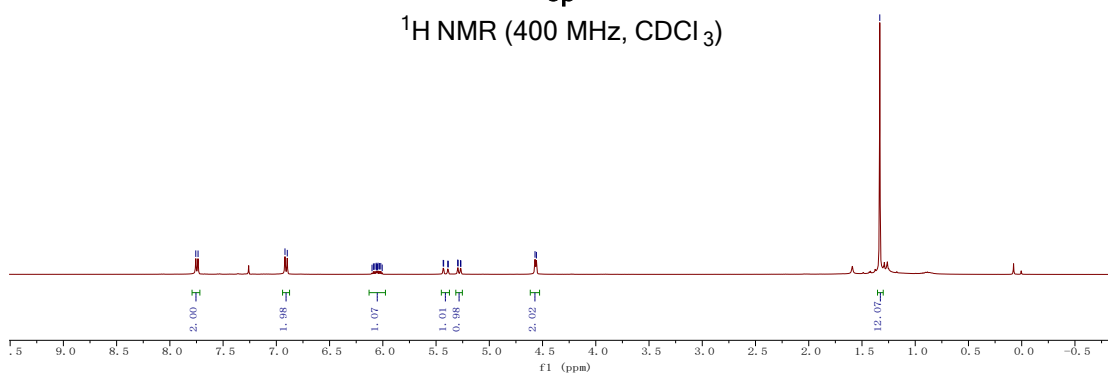

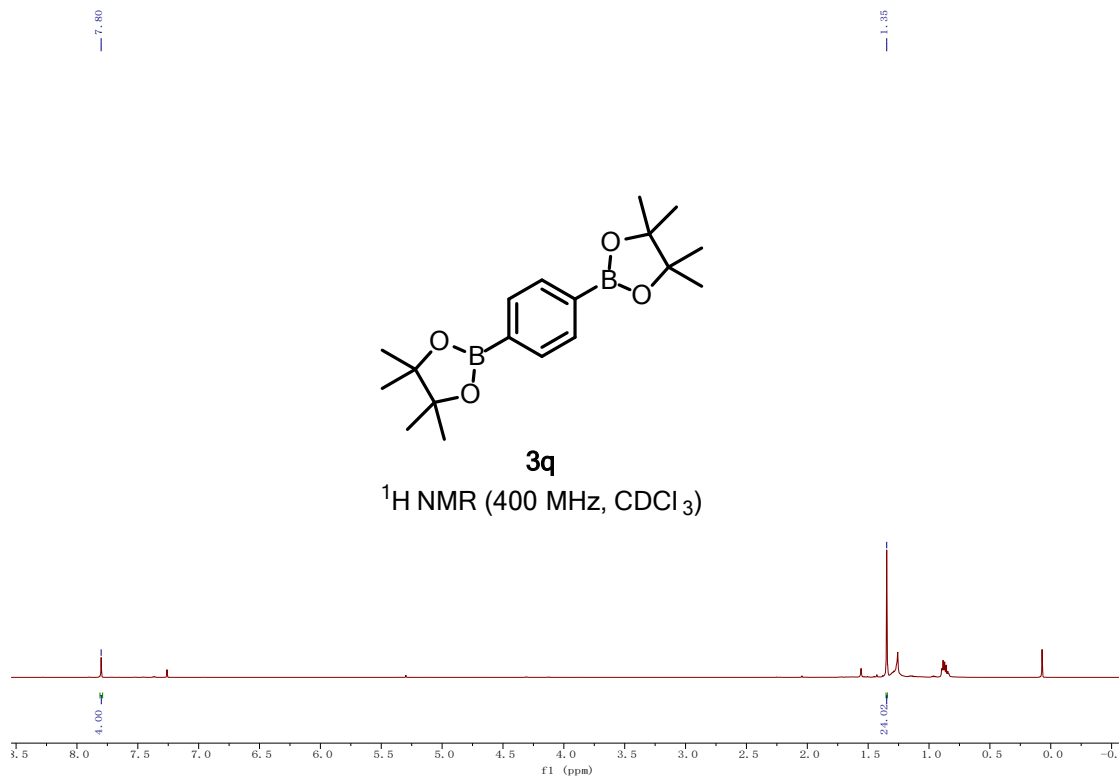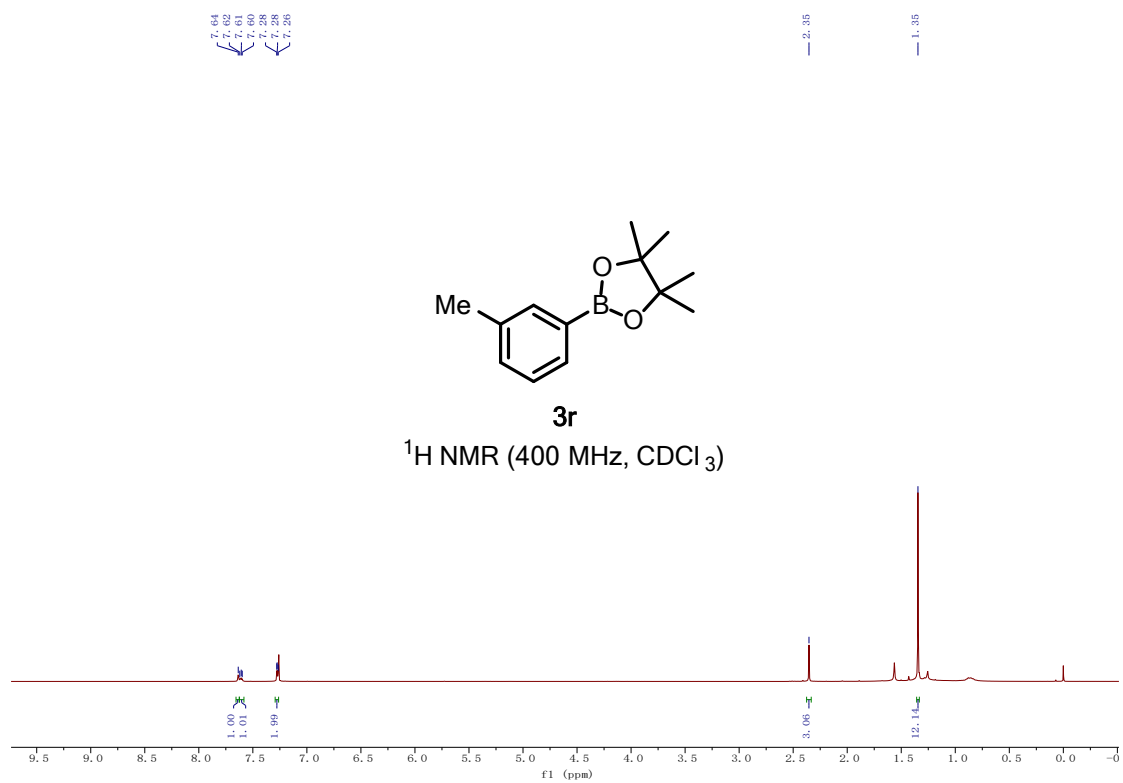

7.222  
7.199  
7.177  
7.154  
7.131  
6.890  
6.788

3.51

1.34

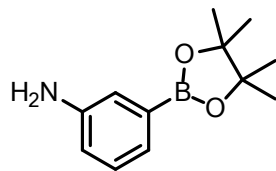

**3s**

$^1\text{H}$  NMR (400 MHz,  $\text{CDCl}_3$ )

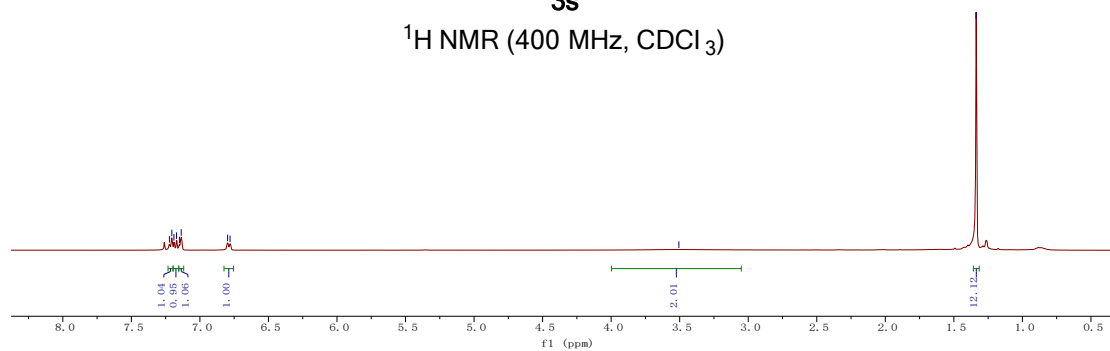

f

7.58  
7.56  
7.49  
7.47  
7.36  
7.33  
7.31  
7.16  
7.14  
7.11

1.35

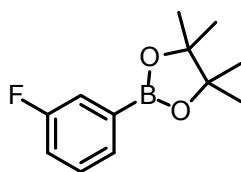

**3t**

$^1\text{H}$  NMR (400 MHz,  $\text{CDCl}_3$ )

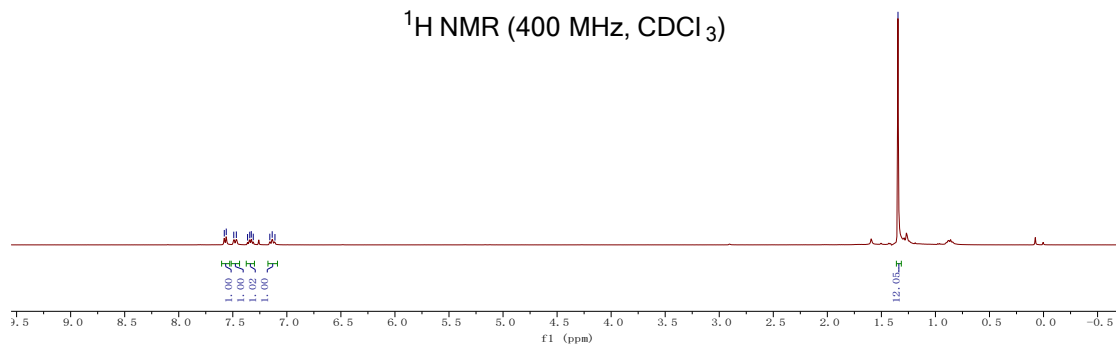

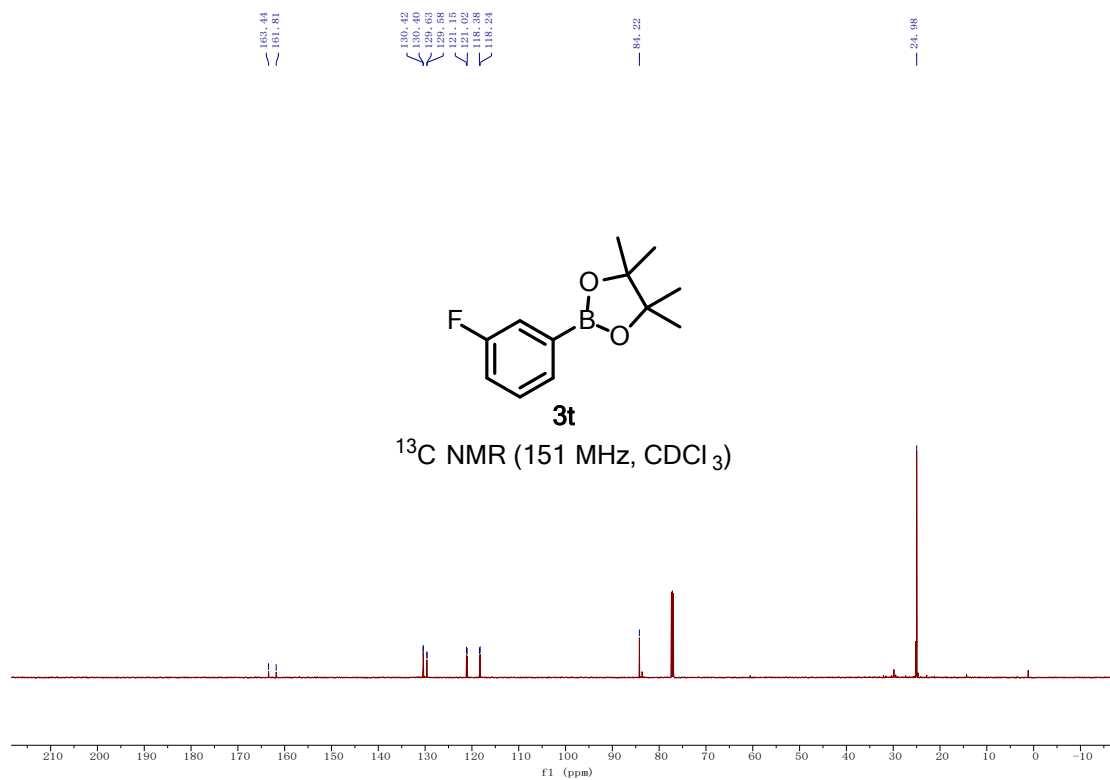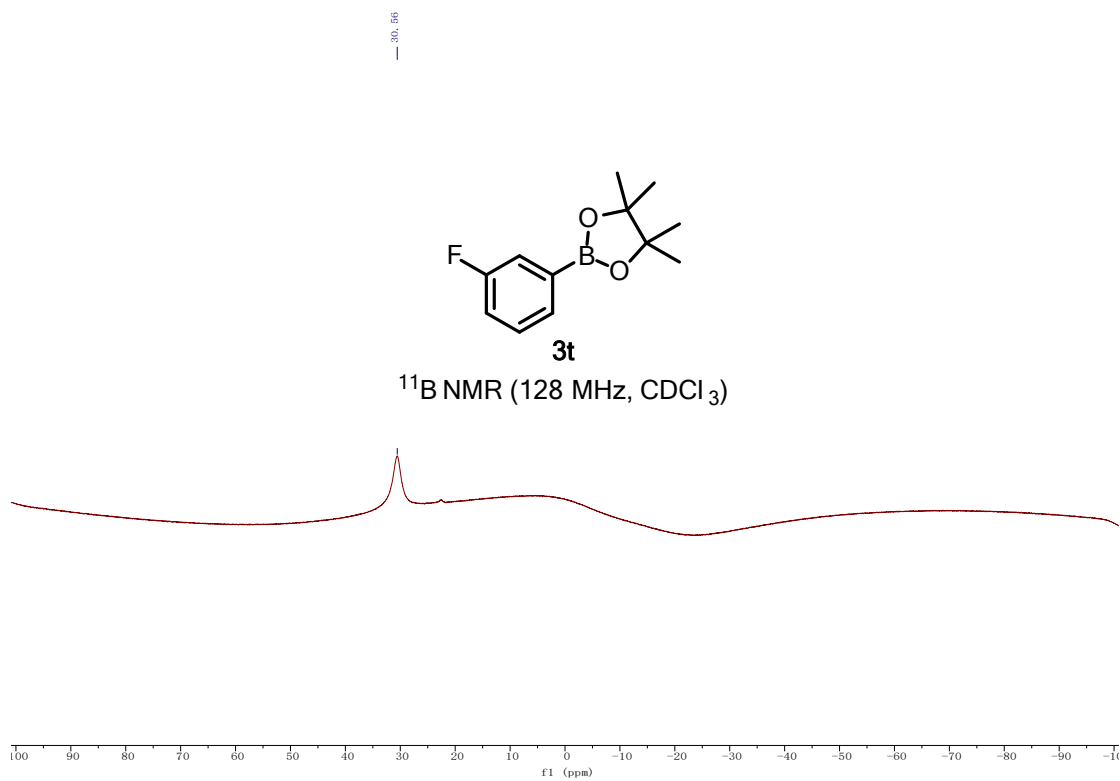

-114.14  
-114.16  
-114.17  
-114.18  
-114.19  
-114.20

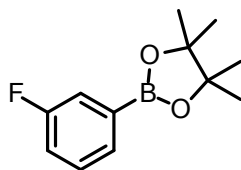

**3t**

$^{19}\text{F}$  NMR (377 MHz,  $\text{CDCl}_3$ )

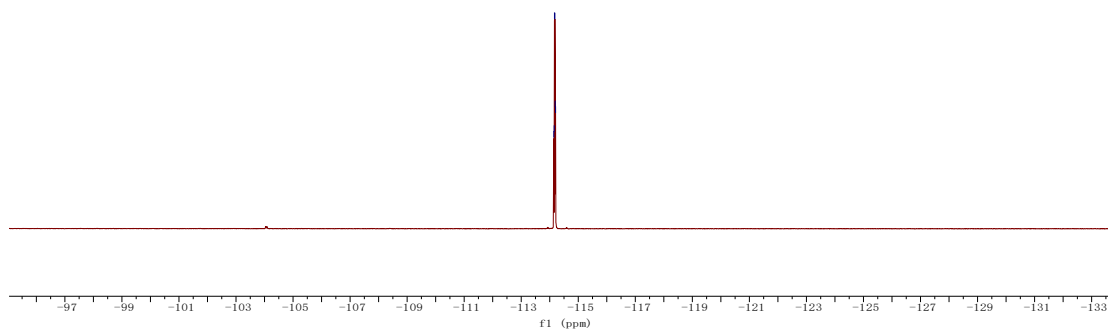

7.81  
7.79  
7.77

7.34  
7.32  
7.18

2.58  
2.35

1.37  
1.35

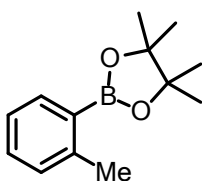

**3u**

$^1\text{H}$  NMR (400 MHz,  $\text{CDCl}_3$ )

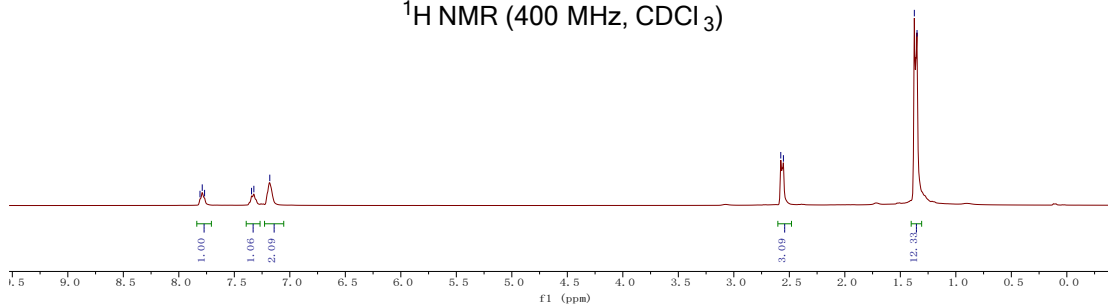

7.62  
7.61  
7.53  
7.52  
7.50  
6.70  
6.68  
6.62  
6.59

1.34

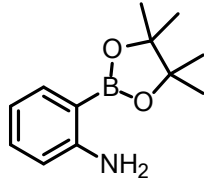

**3v**

<sup>1</sup>H NMR (400 MHz, CDCl<sub>3</sub>)

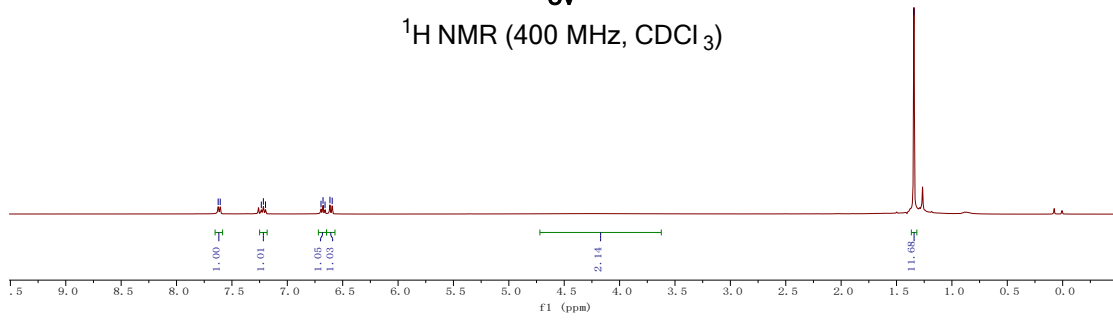

153.73

136.92

132.87

117.04

114.91

83.64

25.05

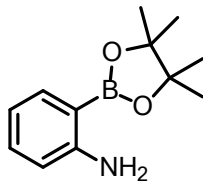

**3v**

<sup>13</sup>C NMR (151 MHz, CDCl<sub>3</sub>)

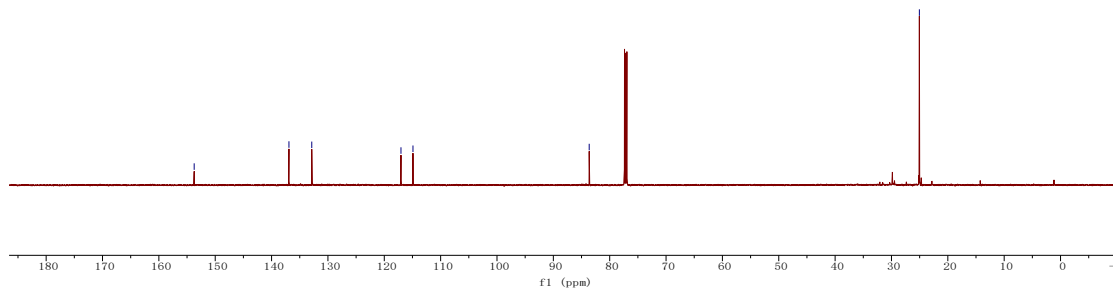

— 31.12

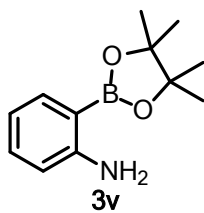

$^{11}\text{B}$  NMR (193 MHz,  $\text{CDCl}_3$ )

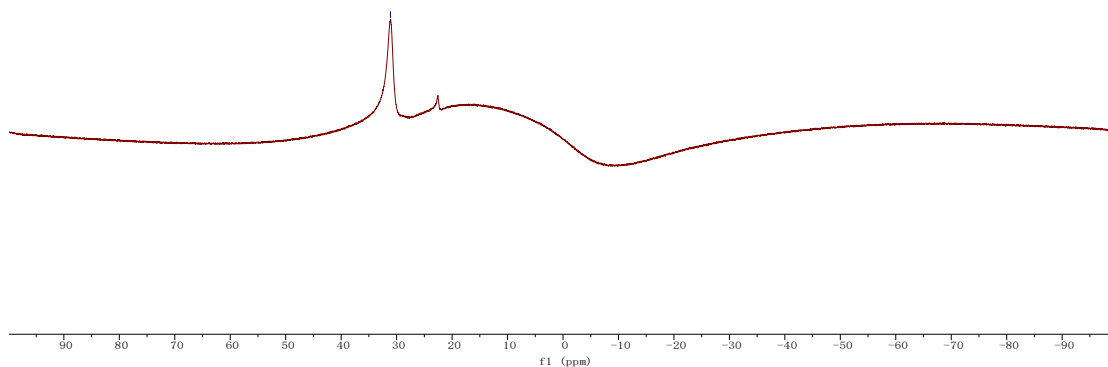

7.729  
7.728  
7.727  
7.337  
7.336  
7.335  
7.211  
7.210  
7.209  
7.119  
6.604  
6.603  
6.602  
6.601  
6.600  
6.599  
6.598  
6.597  
6.503  
6.502  
6.501  
6.500  
4.999  
4.998  
4.997  
4.87  
3.71  
3.70

1.34

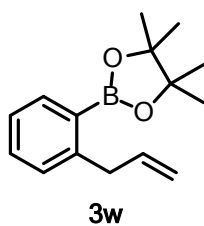

$^1\text{H}$  NMR (600 MHz,  $\text{CDCl}_3$ )

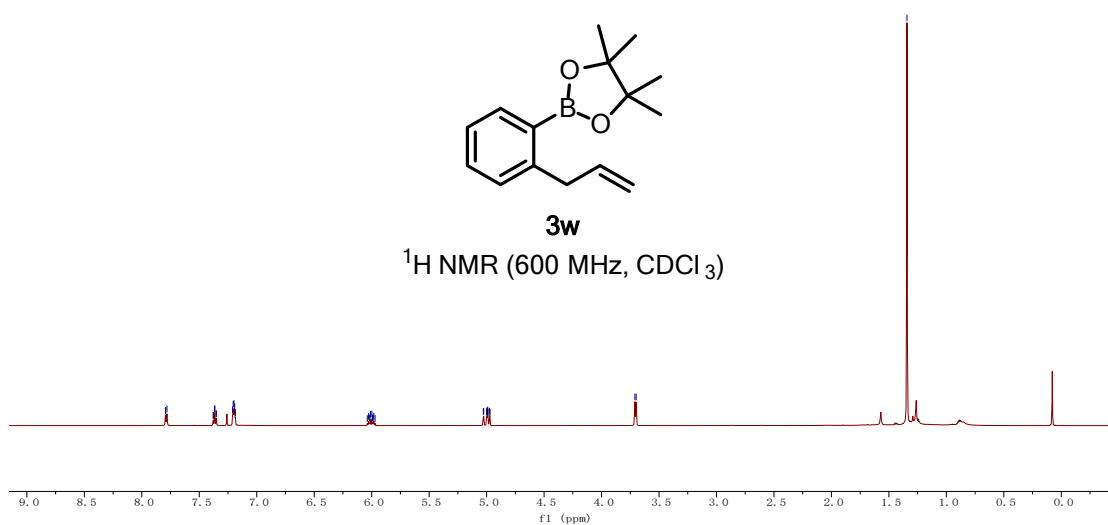



146.92  
138.34  
136.21  
131.17  
129.32  
128.45  
114.86  
82.62  
39.94  
25.02

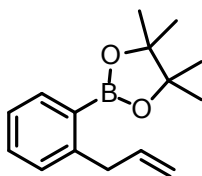

**3w**

$^{13}\text{C}$  NMR (151 MHz,  $\text{CDCl}_3$ )

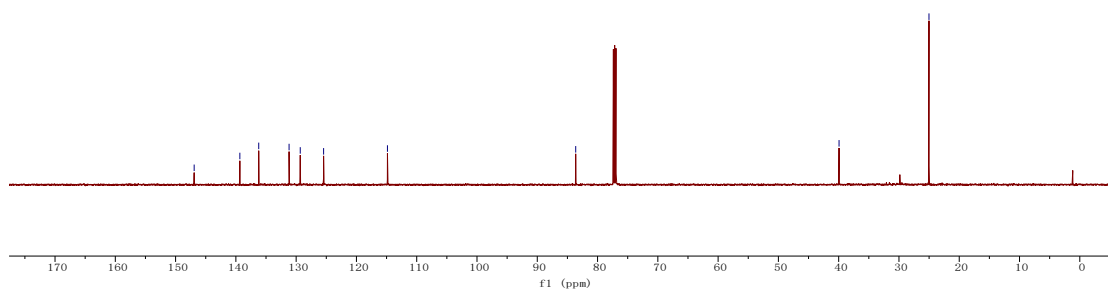

31.35

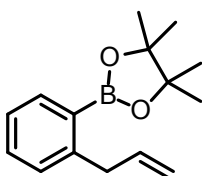

**3w**

$^{11}\text{B}$  NMR (193 MHz,  $\text{CDCl}_3$ )

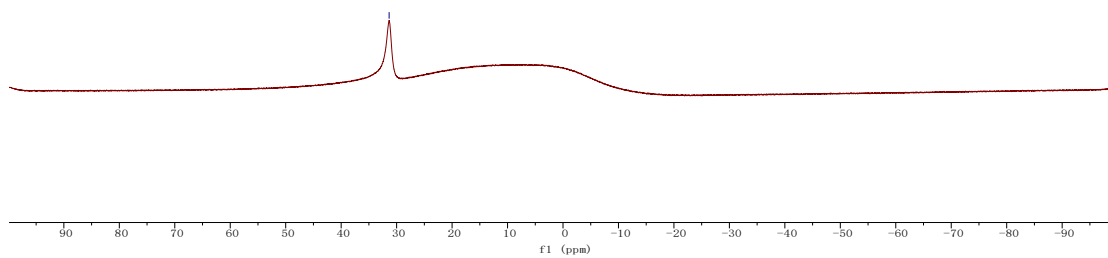

7.60  
7.16  
7.14  
7.07

2.62  
2.33

1.36

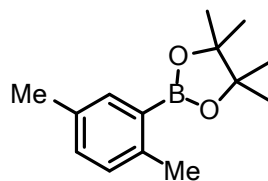

**3x**

<sup>1</sup>H NMR (400 MHz, CDCl<sub>3</sub>)

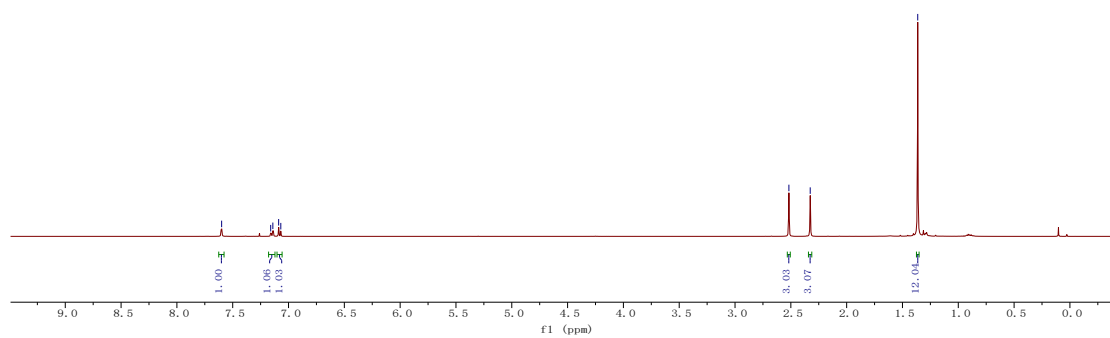

141.84  
135.69  
134.05  
131.69  
129.92

83.47

25.01  
21.83  
20.82

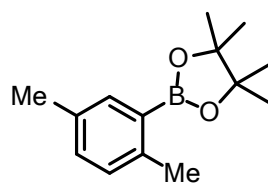

**3x**

<sup>13</sup>C NMR (151 MHz, CDCl<sub>3</sub>)

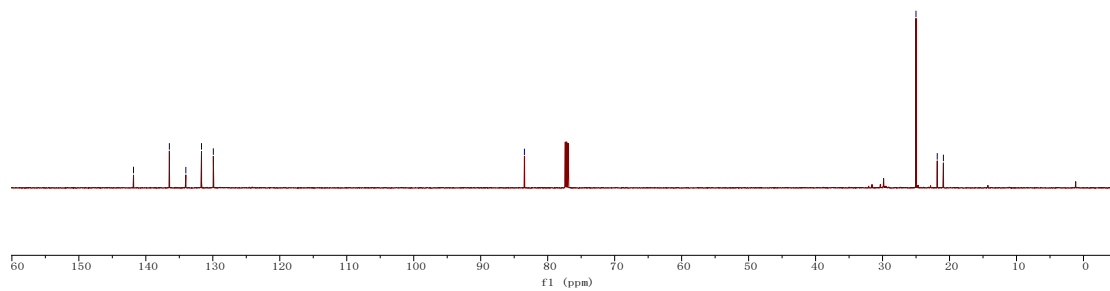

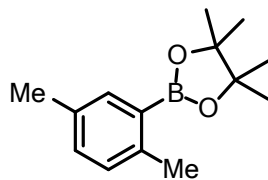

**3x**

$^{11}\text{B}$  NMR (128 MHz,  $\text{CDCl}_3$ )

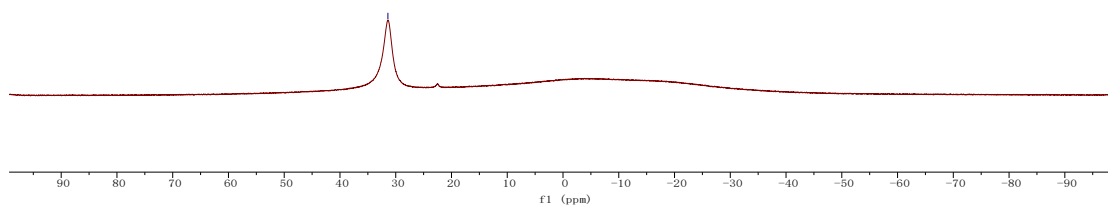

7.43  
7.43  
7.41  
7.41  
7.29  
7.29  
6.89  
6.89

3.92  
3.90

1.34

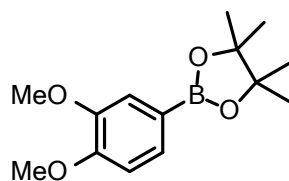

**3y**

$^1\text{H}$  NMR (400 MHz,  $\text{CDCl}_3$ )

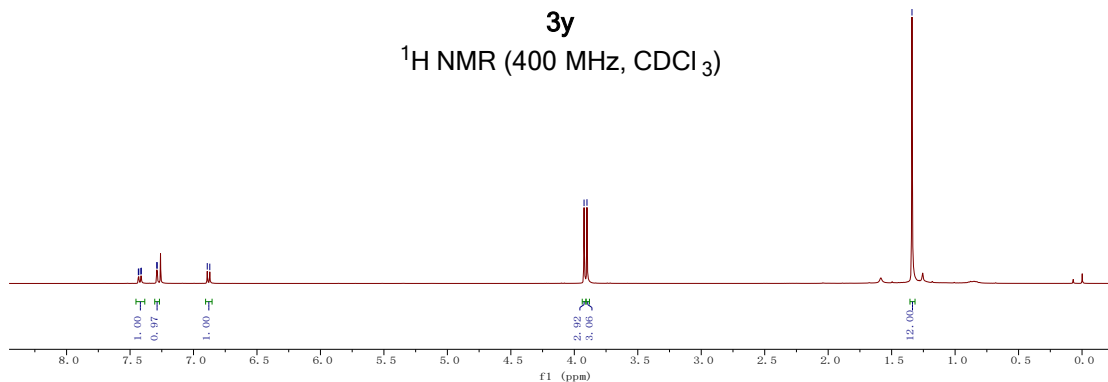

151.79  
148.49

138.70

116.71

110.63

83.80

56.00  
55.88

25.00

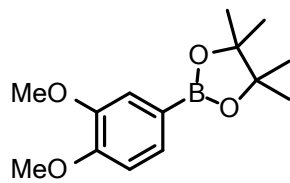

**3y**

<sup>13</sup>C NMR (151 MHz, CDCl<sub>3</sub>)

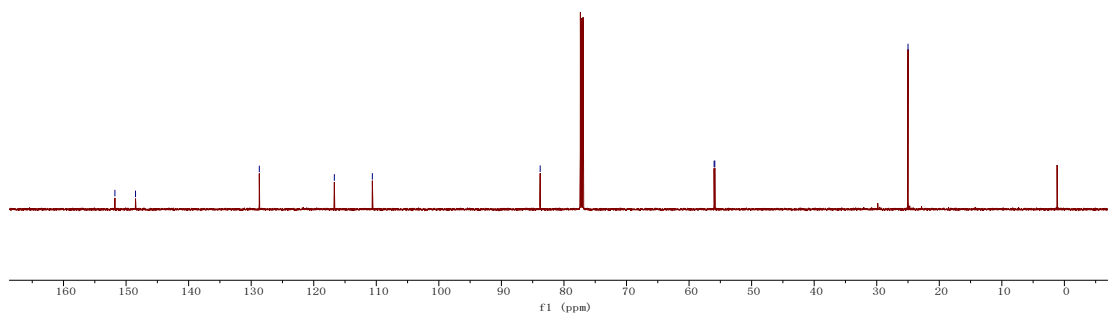

30.69

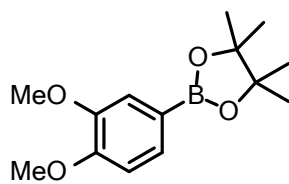

**3y**

<sup>11</sup>B NMR (128 MHz, CDCl<sub>3</sub>)

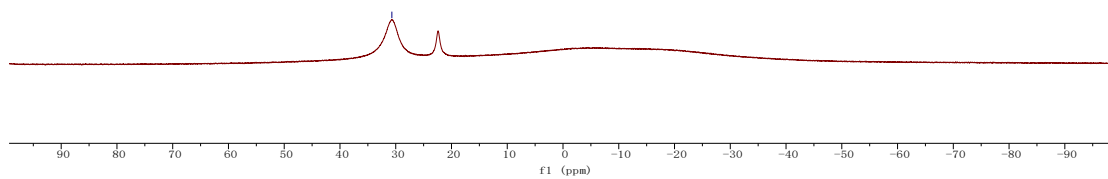

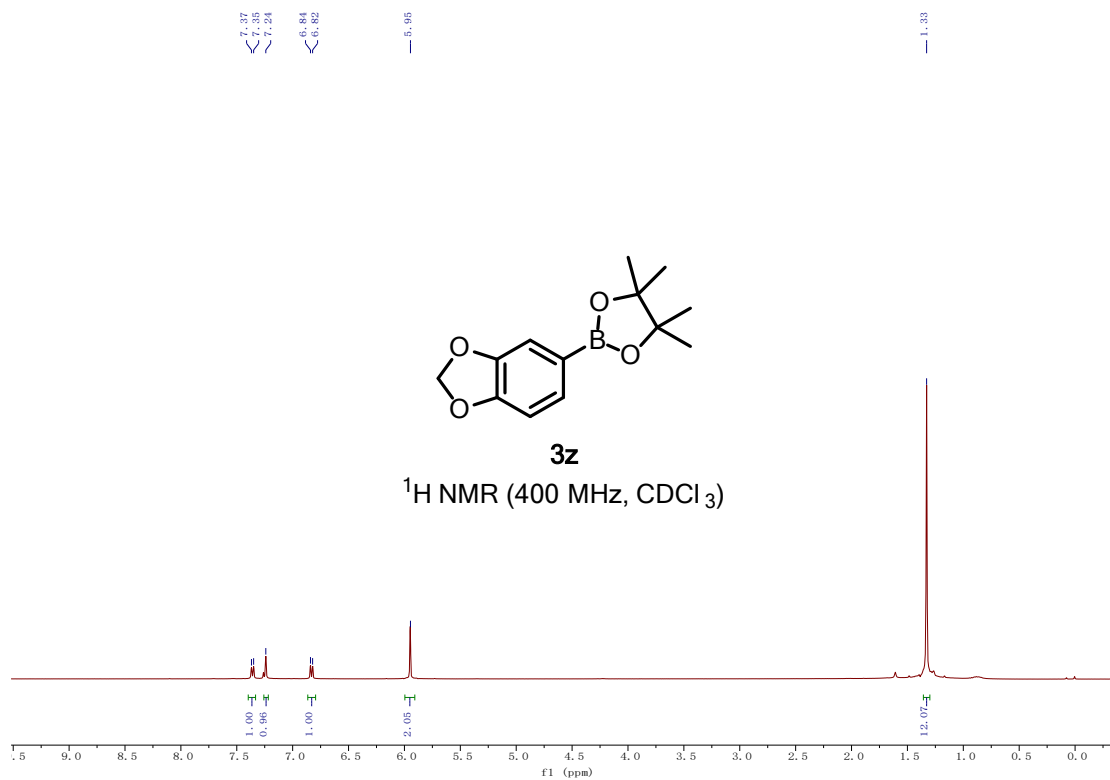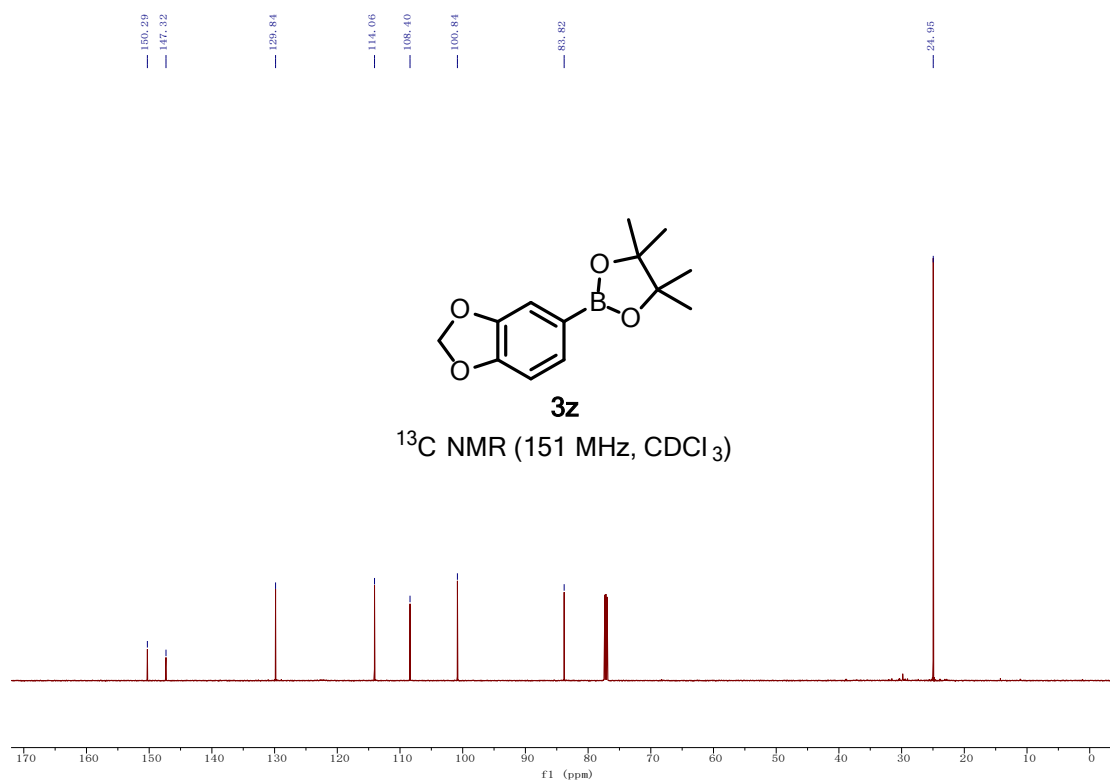

30.06

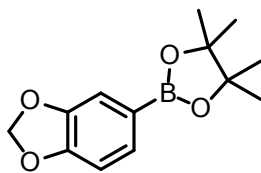

**3z**

$^{11}\text{B}$  NMR (193 MHz,  $\text{CDCl}_3$ )

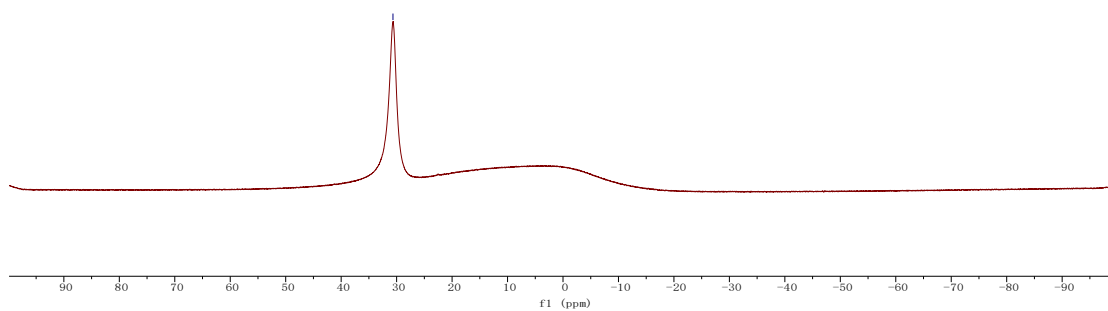

7.18  
7.16  
7.15  
7.08  
7.06

3.57

2.19

1.33

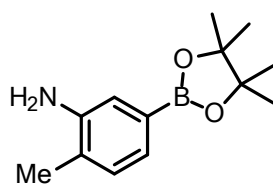

**3aa**

$^1\text{H}$  NMR (400 MHz,  $\text{CDCl}_3$ )

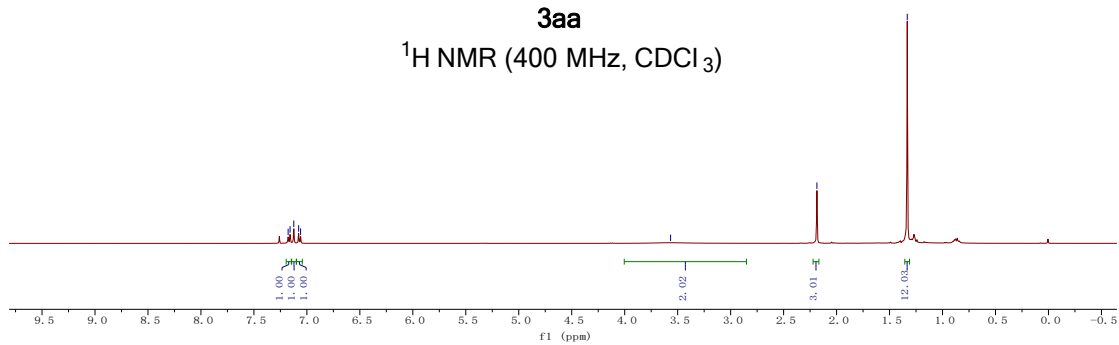

7.51  
7.49  
7.48  
7.47  
7.01  
6.98  
6.96

5.37

1.33

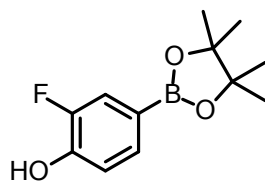

**3ab**

<sup>1</sup>H NMR (400 MHz, CDCl<sub>3</sub>)

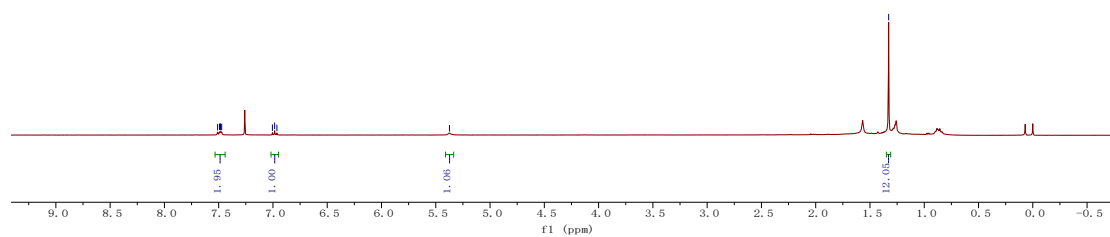

-141.91  
-141.90  
-141.89  
-141.88

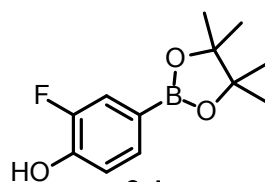

**3ab**

<sup>19</sup>F NMR (377 MHz, CDCl<sub>3</sub>)

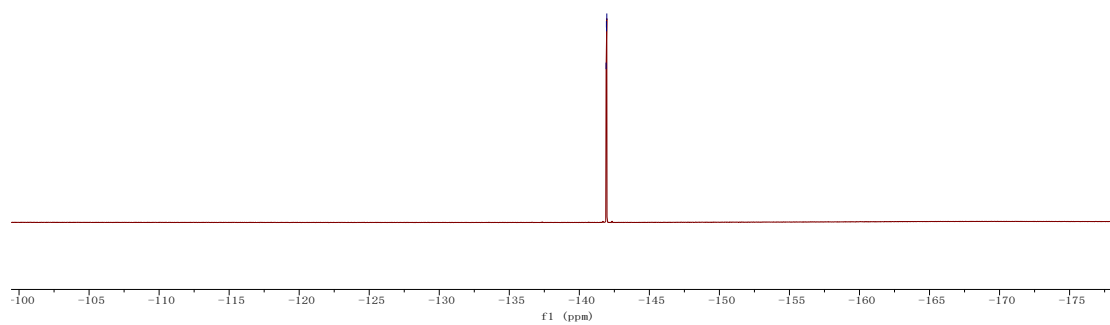

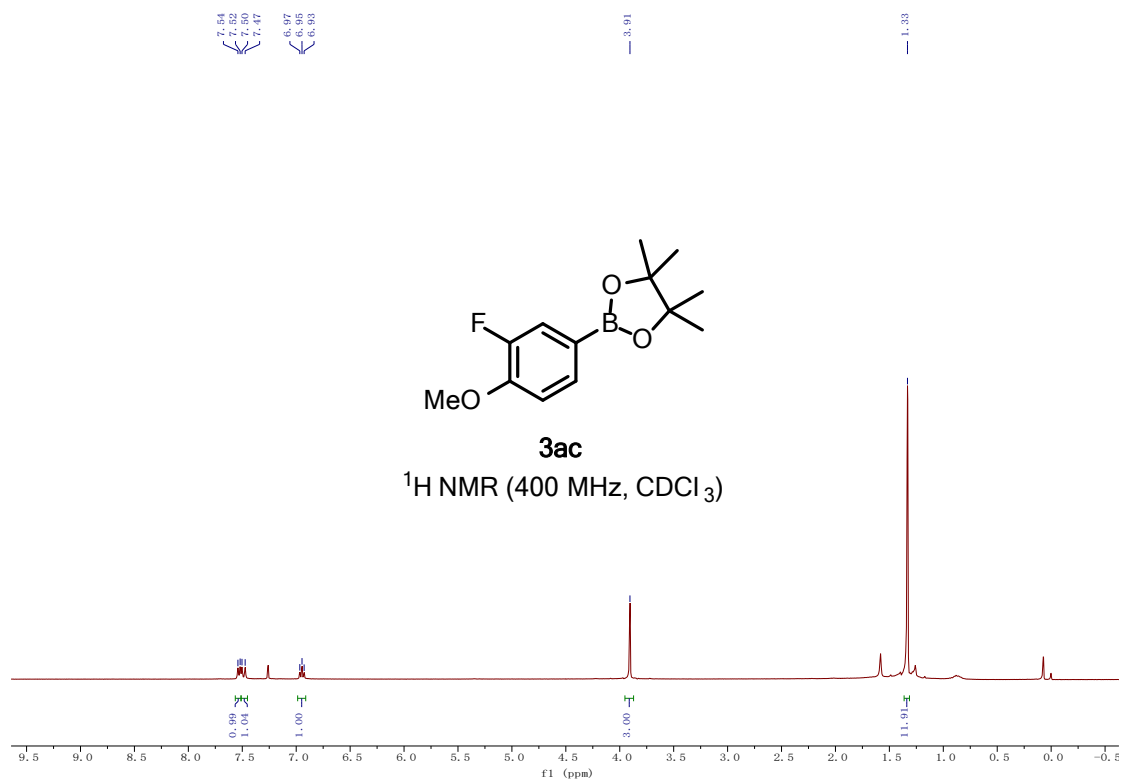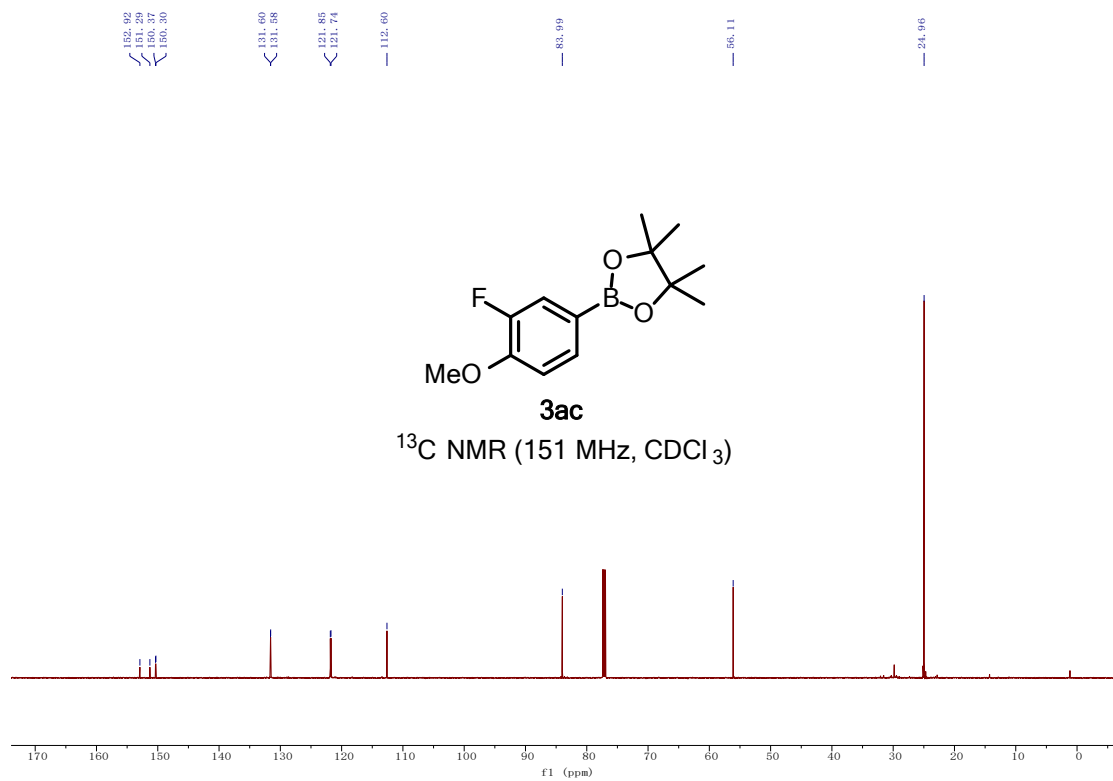



30.69

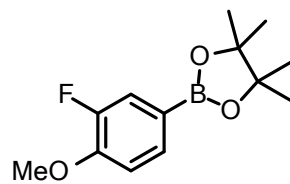

**3ac**

$^{11}\text{B}$  NMR (128 MHz,  $\text{CDCl}_3$ )

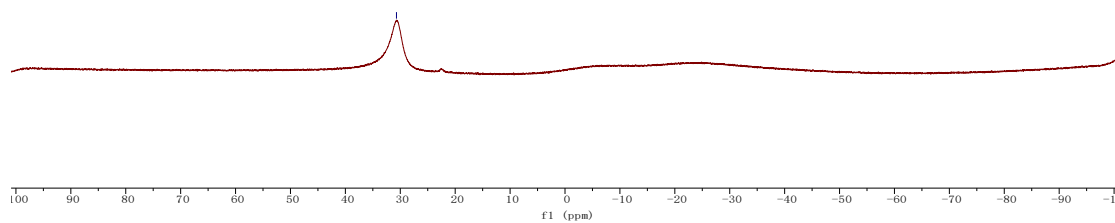

137.12  
137.18  
137.18

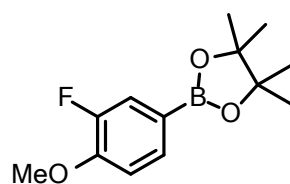

**3ac**

$^{19}\text{F}$  NMR (377 MHz,  $\text{CDCl}_3$ )

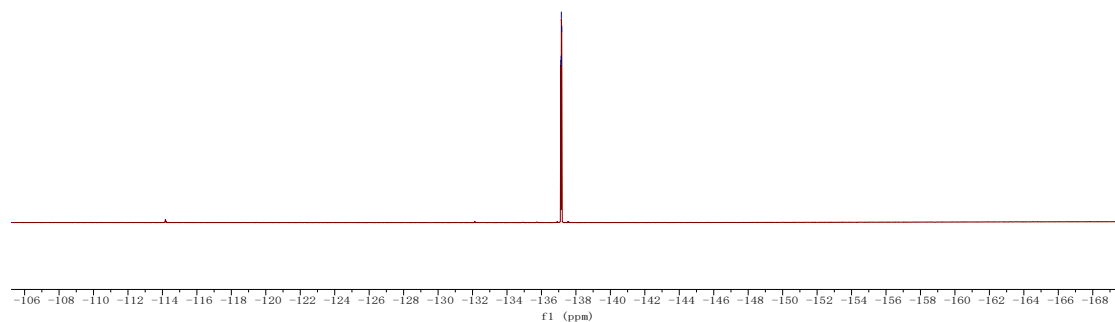

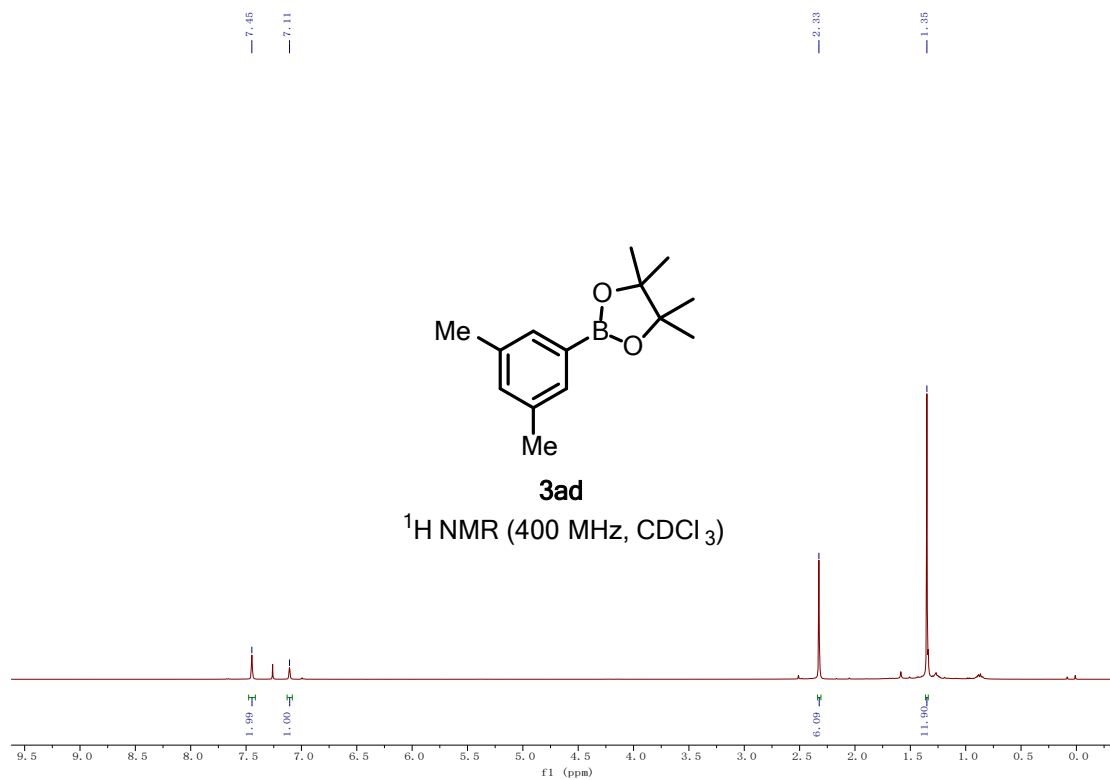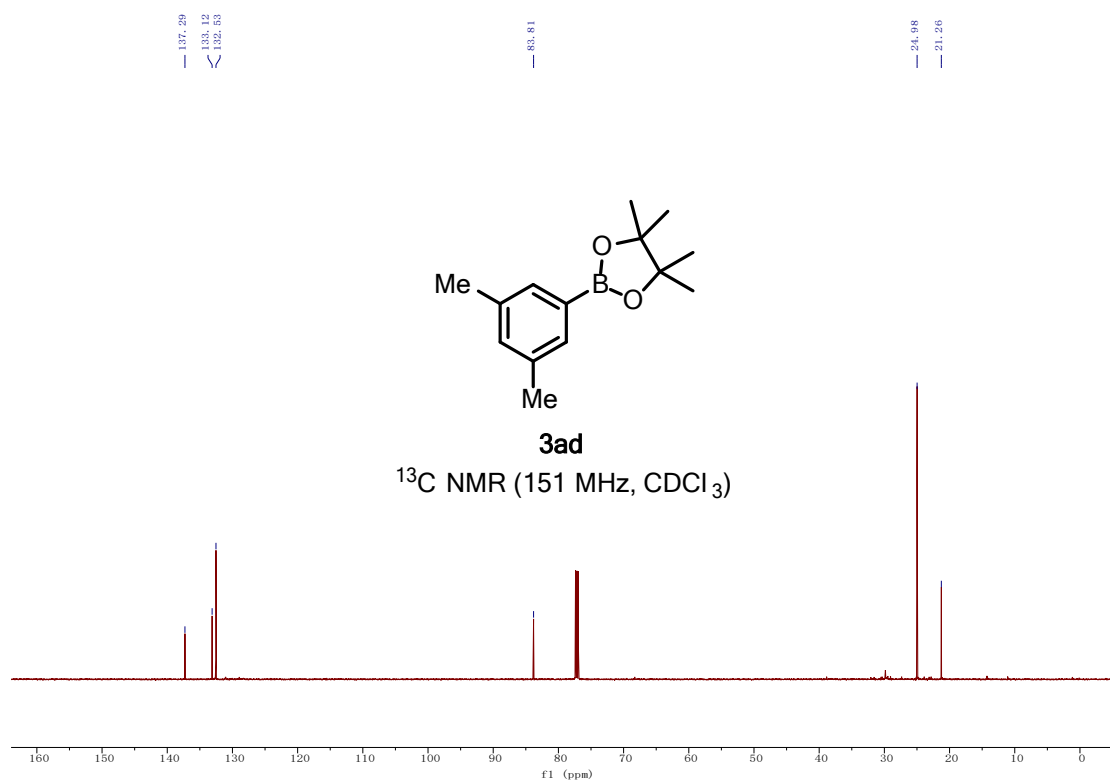

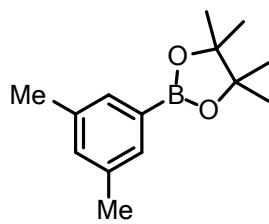

**3ad**

$^{11}\text{B}$  NMR (128 MHz,  $\text{CDCl}_3$ )

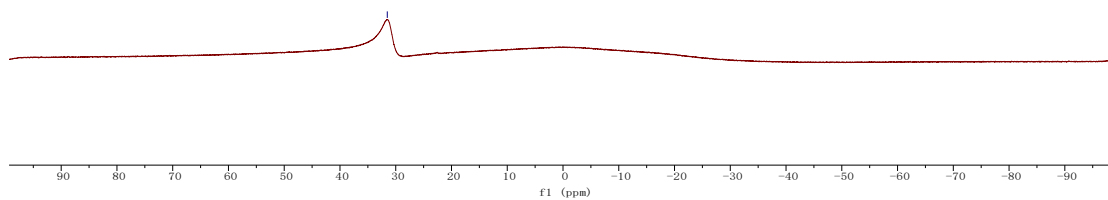

6.95

6.57

3.81

1.34

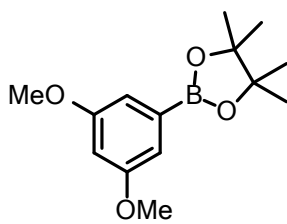

**3ae**

$^1\text{H}$  NMR (400 MHz,  $\text{CDCl}_3$ )

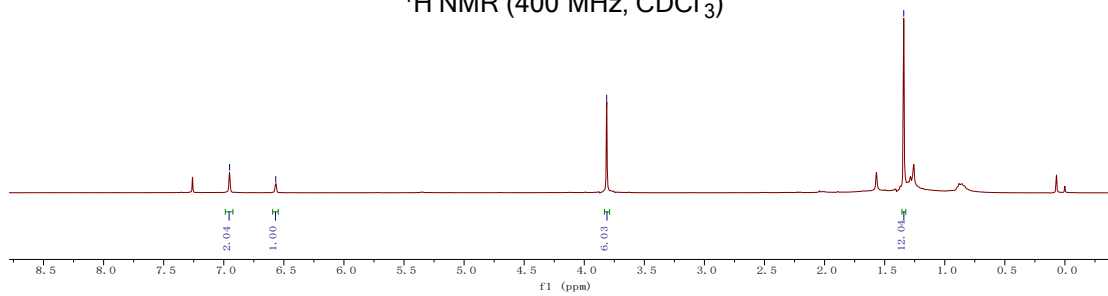

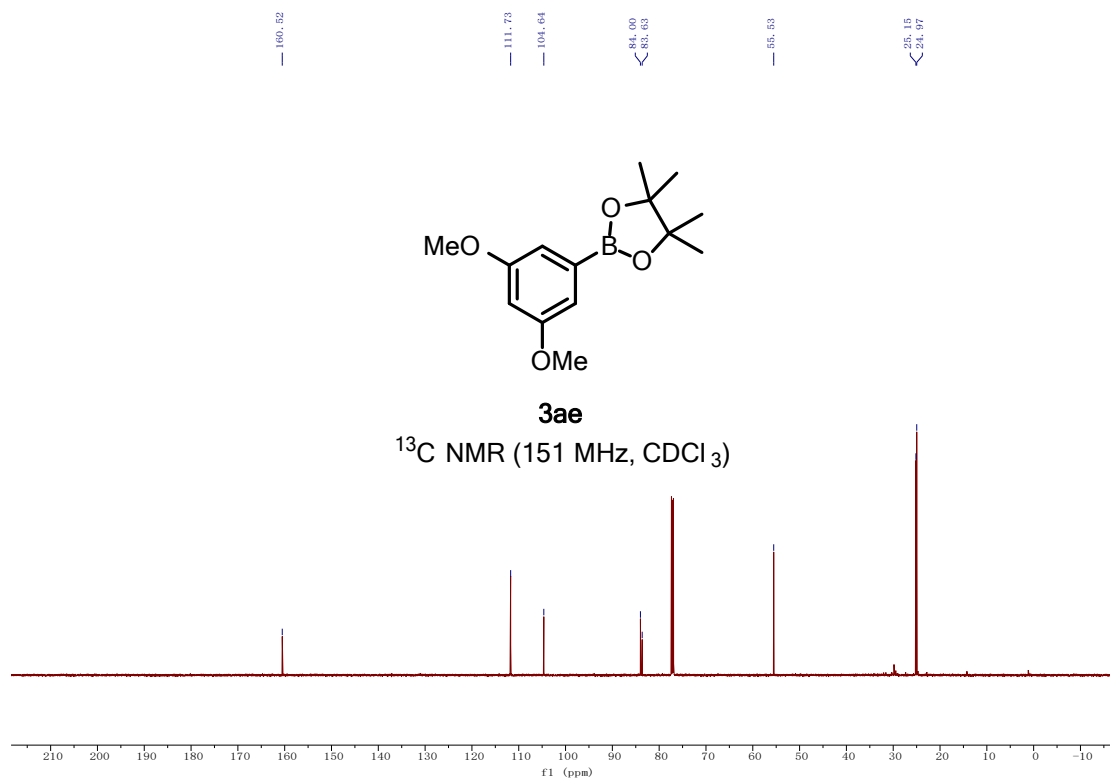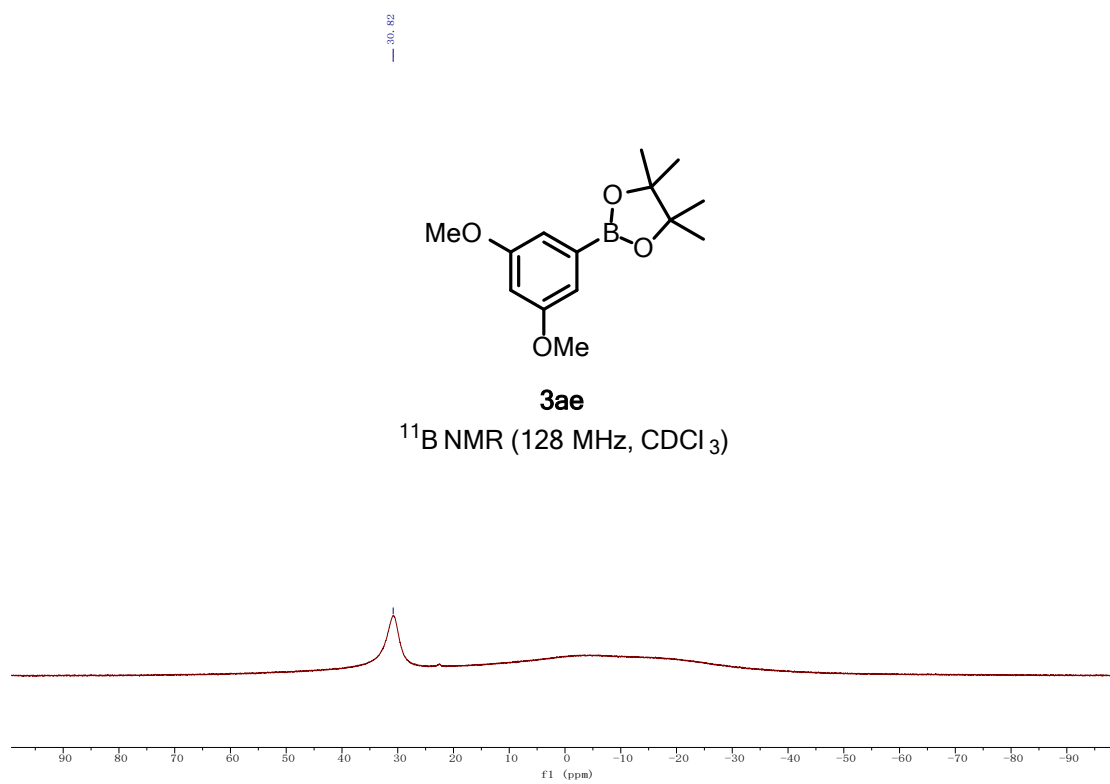

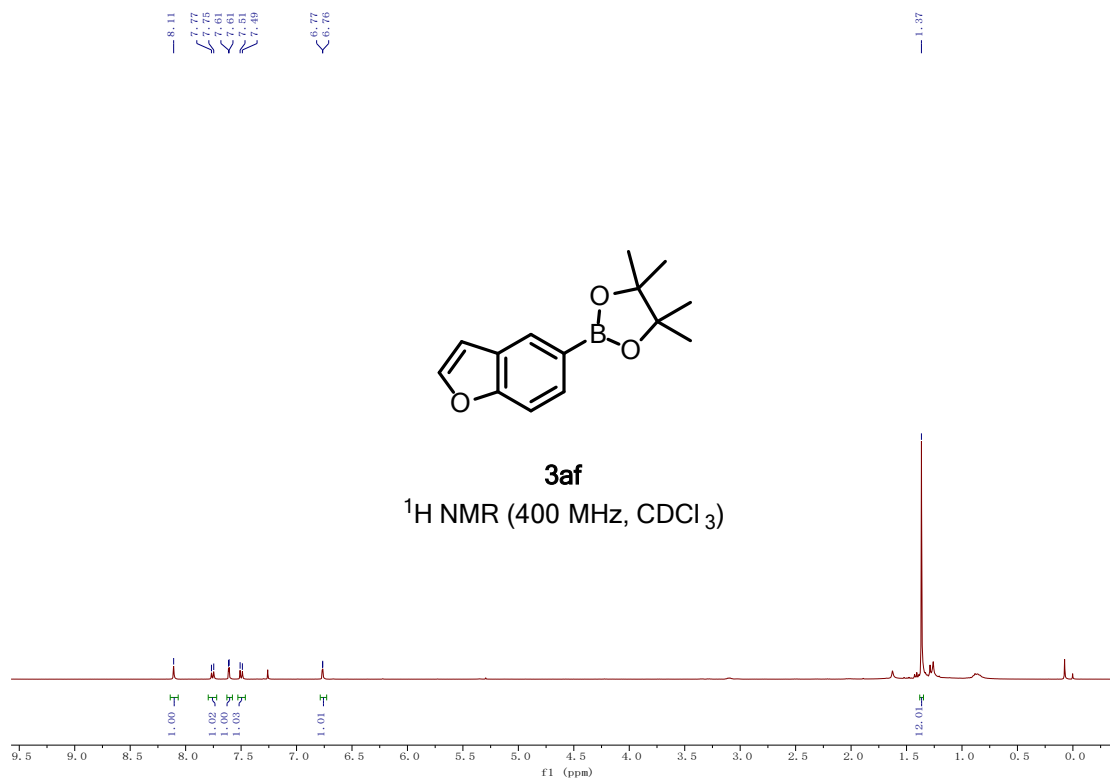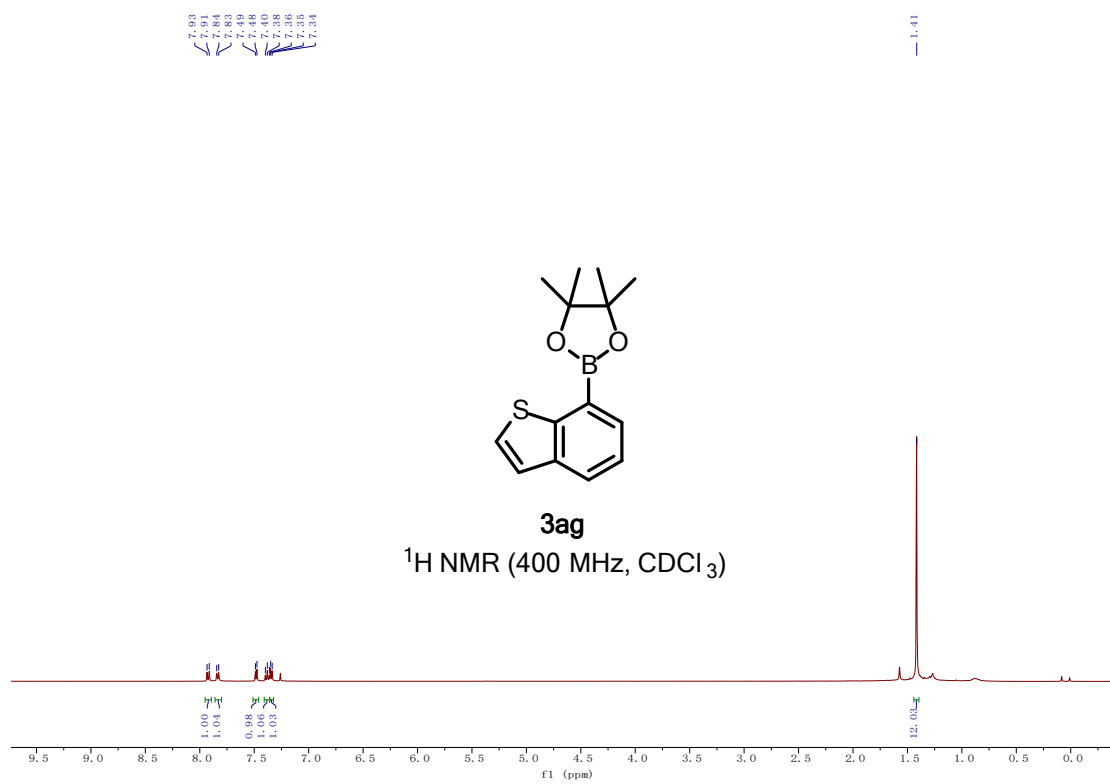

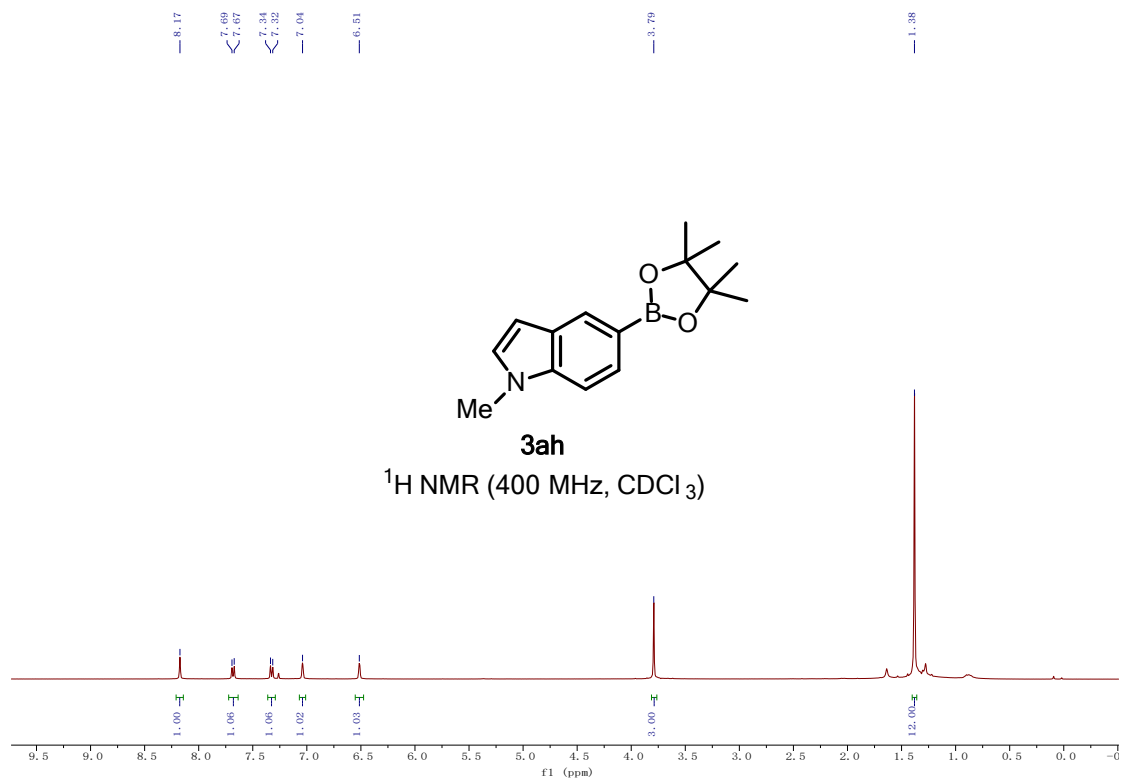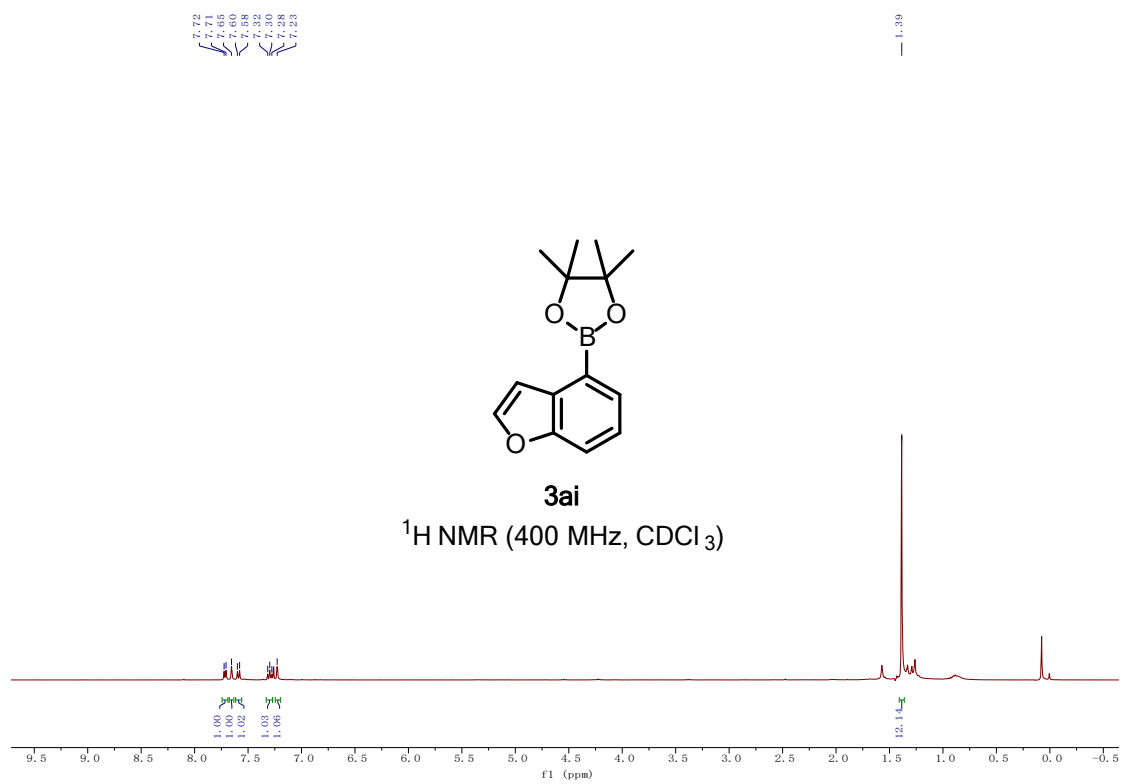

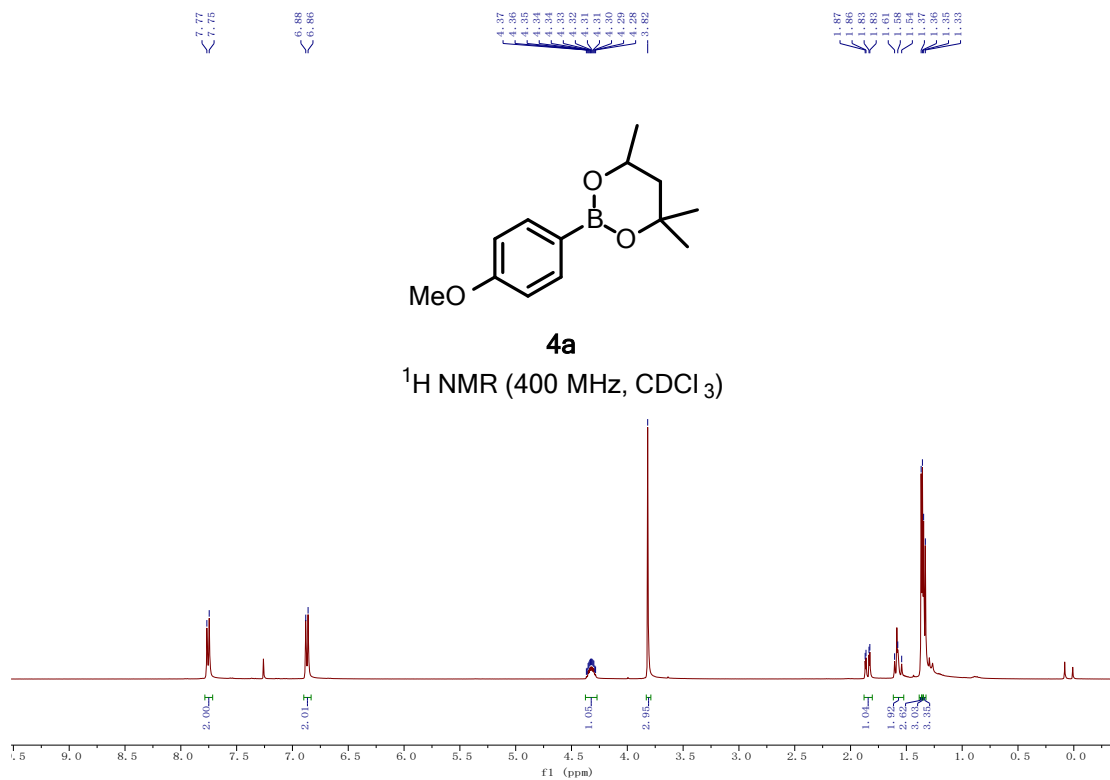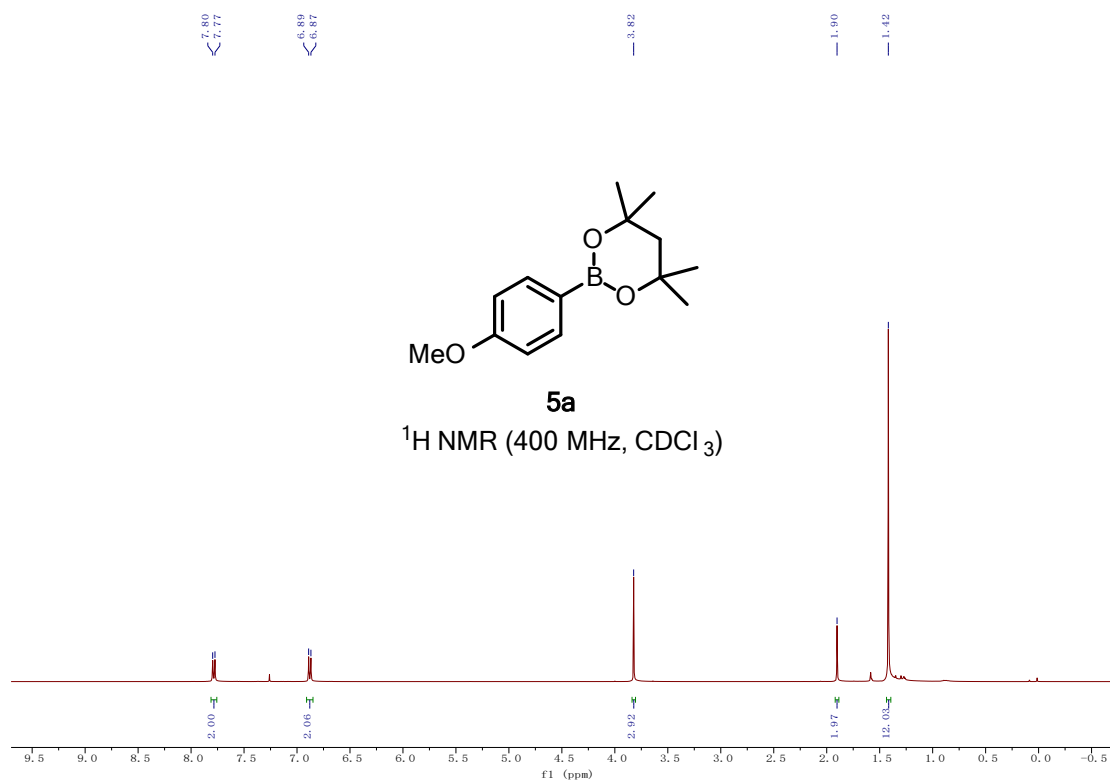

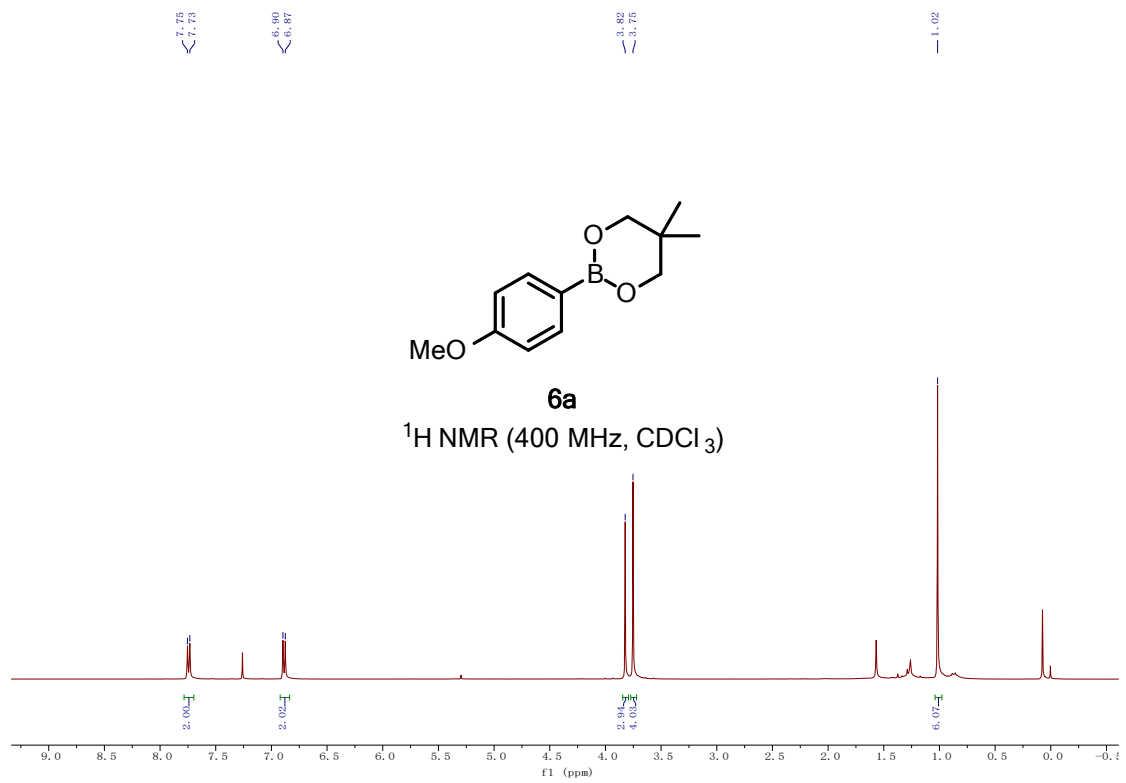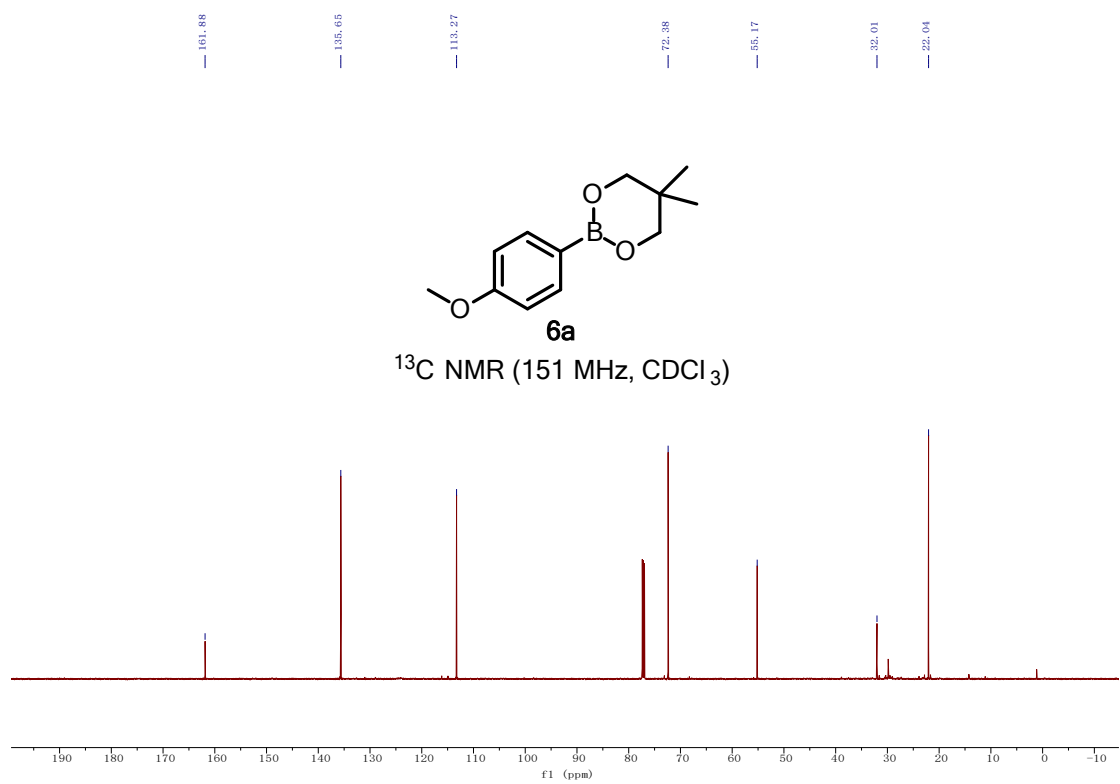



36.79

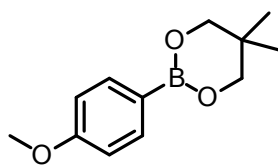

**6a**

$^{11}\text{B}$  NMR (193 MHz,  $\text{CDCl}_3$ )

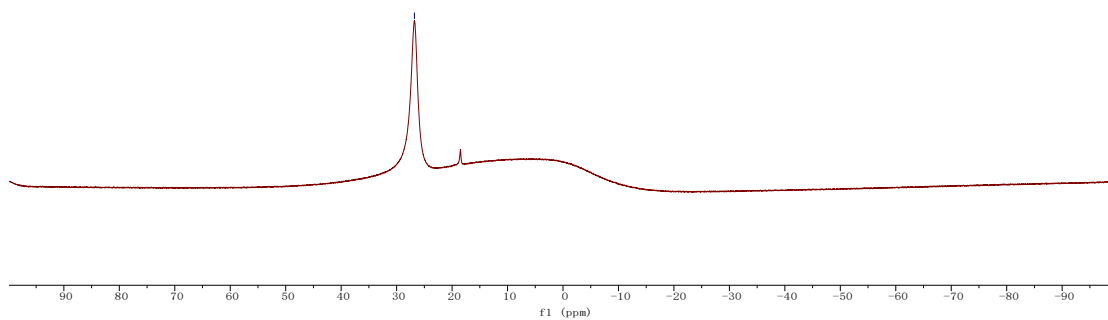

7.83  
7.58  
7.56  
7.42  
7.39  
7.35  
7.35  
7.33  
7.31  
7.31

3.93

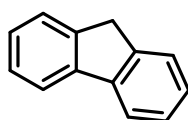

**9a**

$^1\text{H}$  NMR (400 MHz,  $\text{CDCl}_3$ )

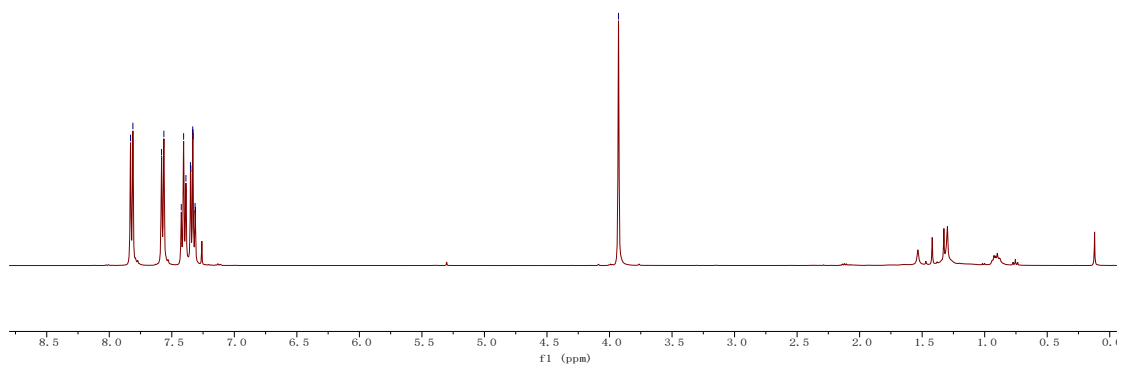

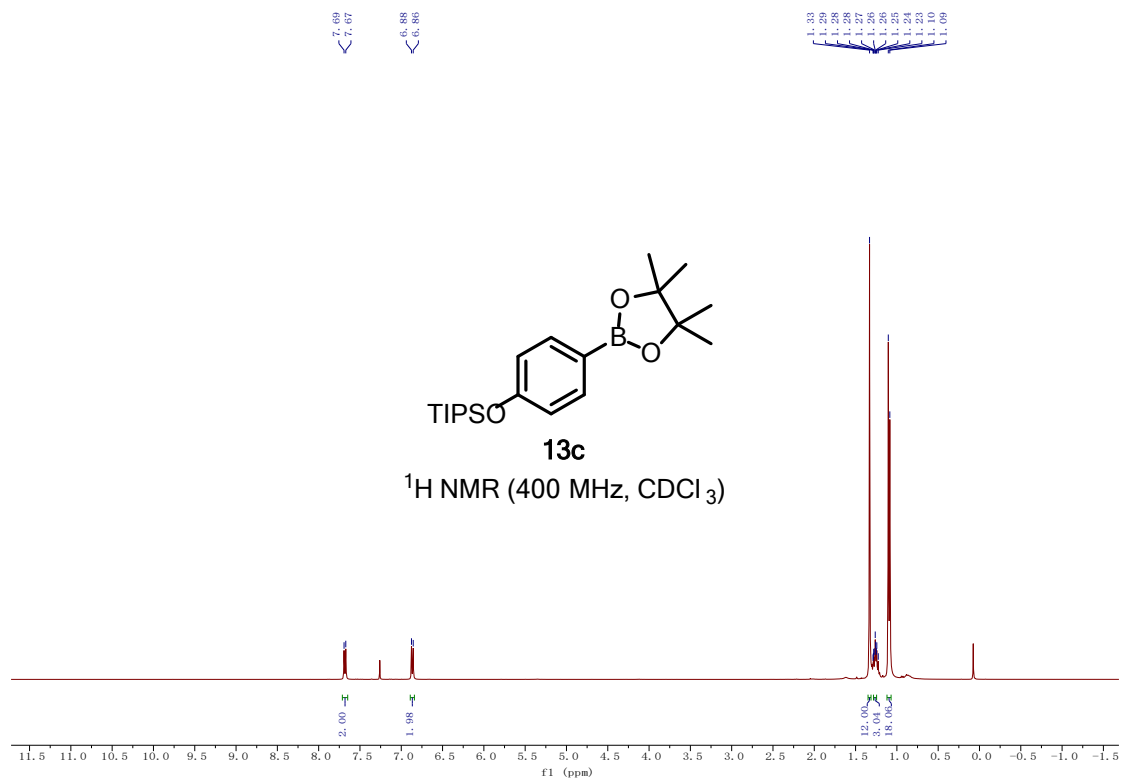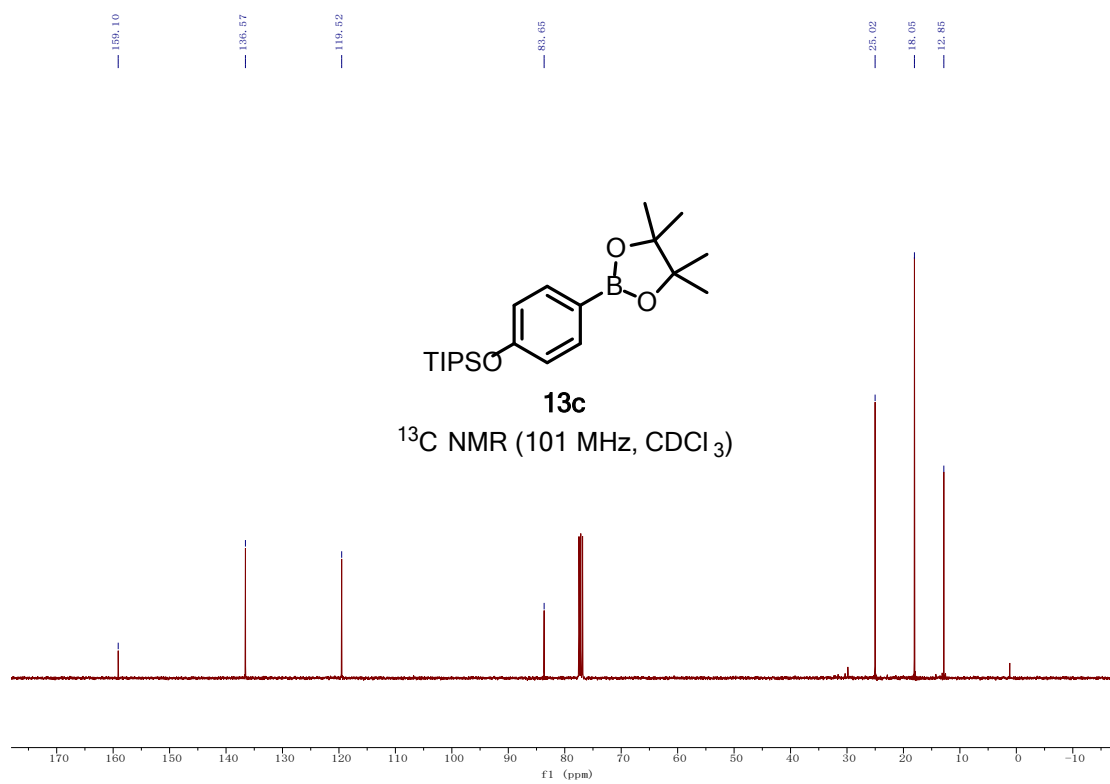

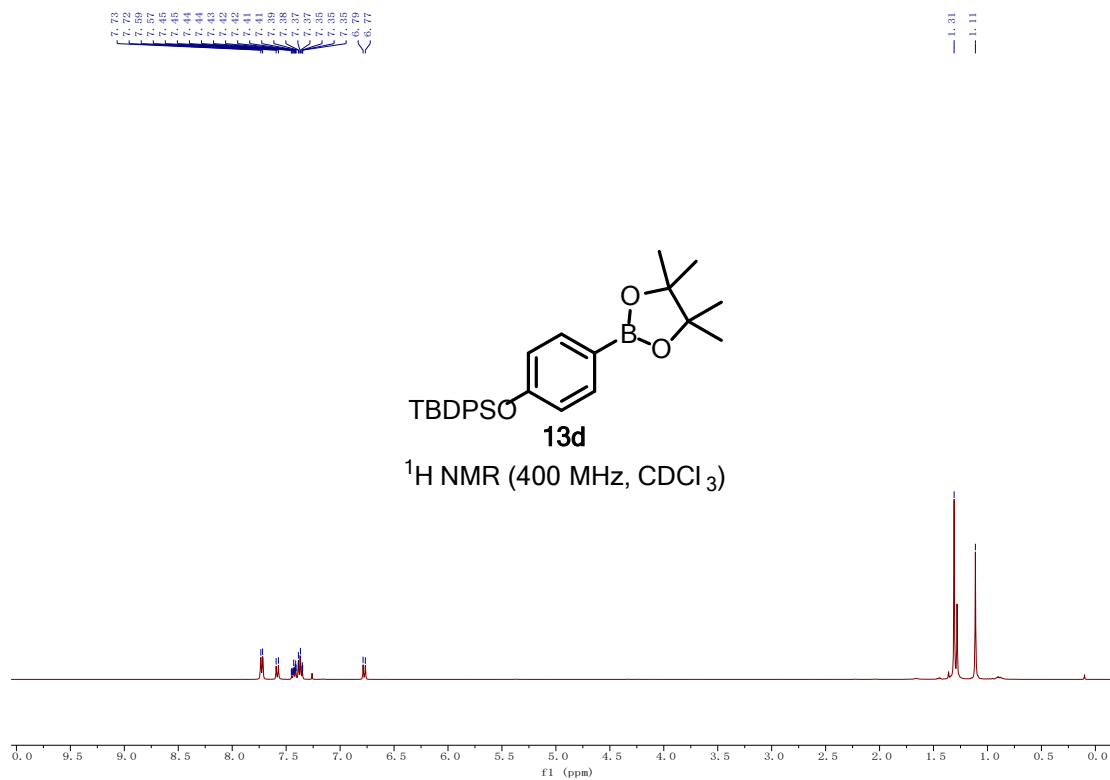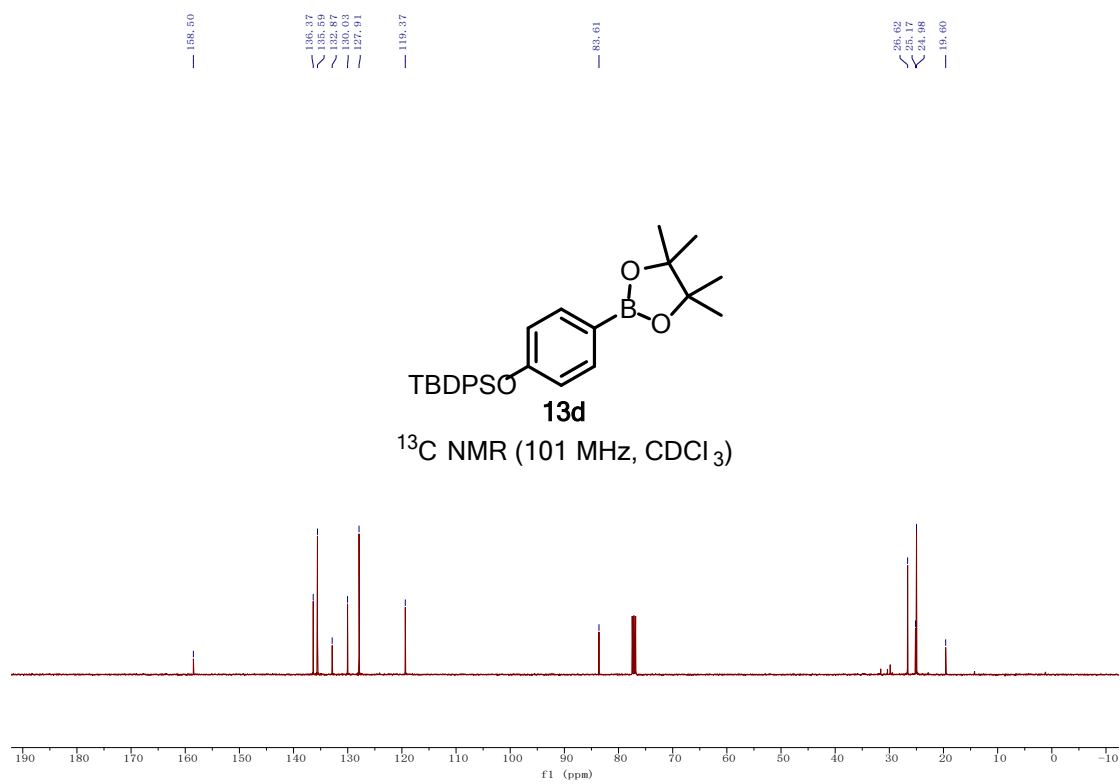

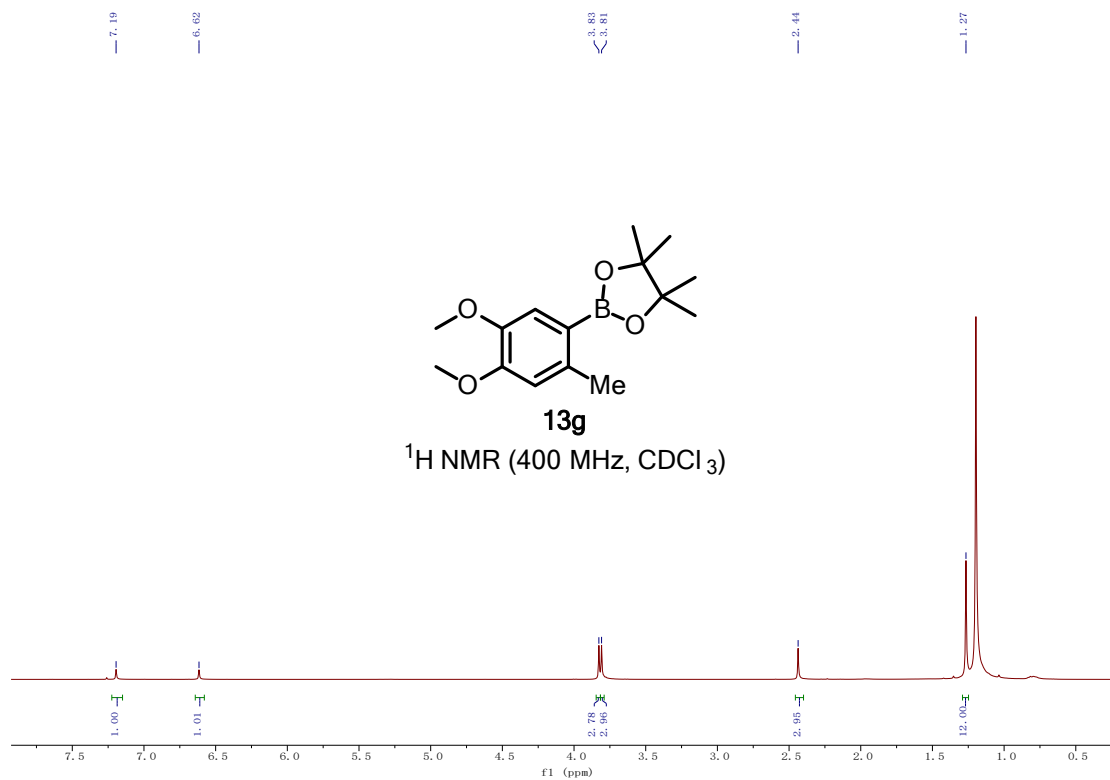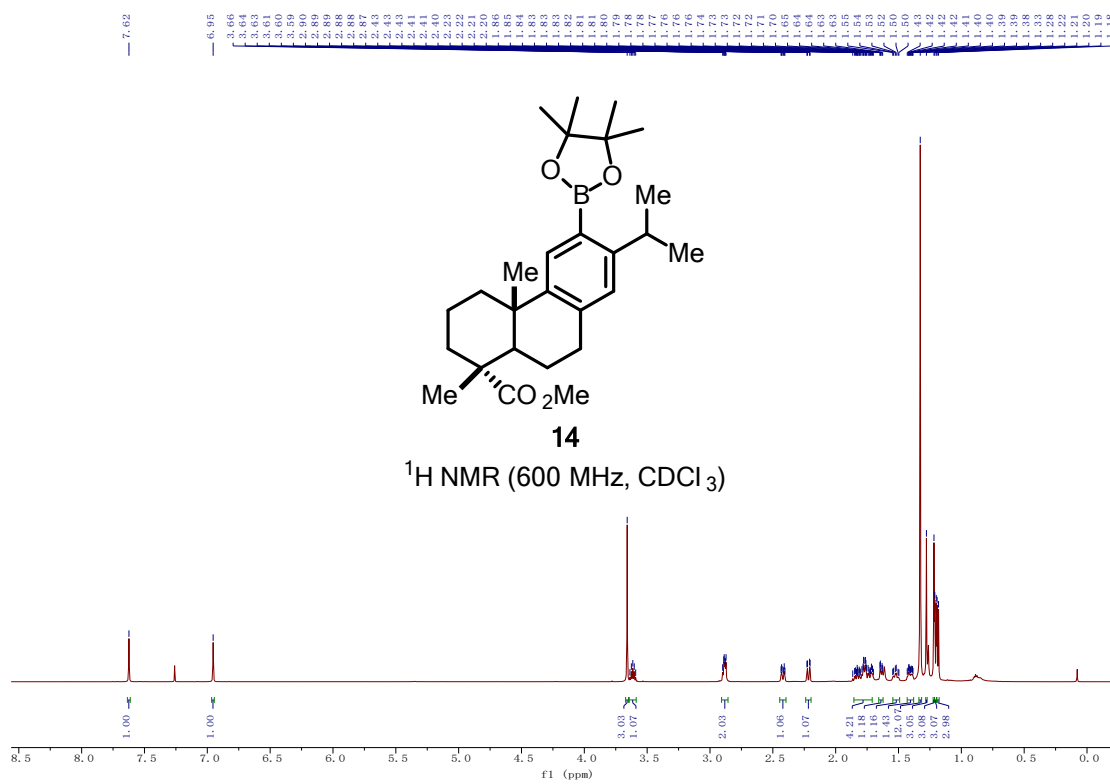

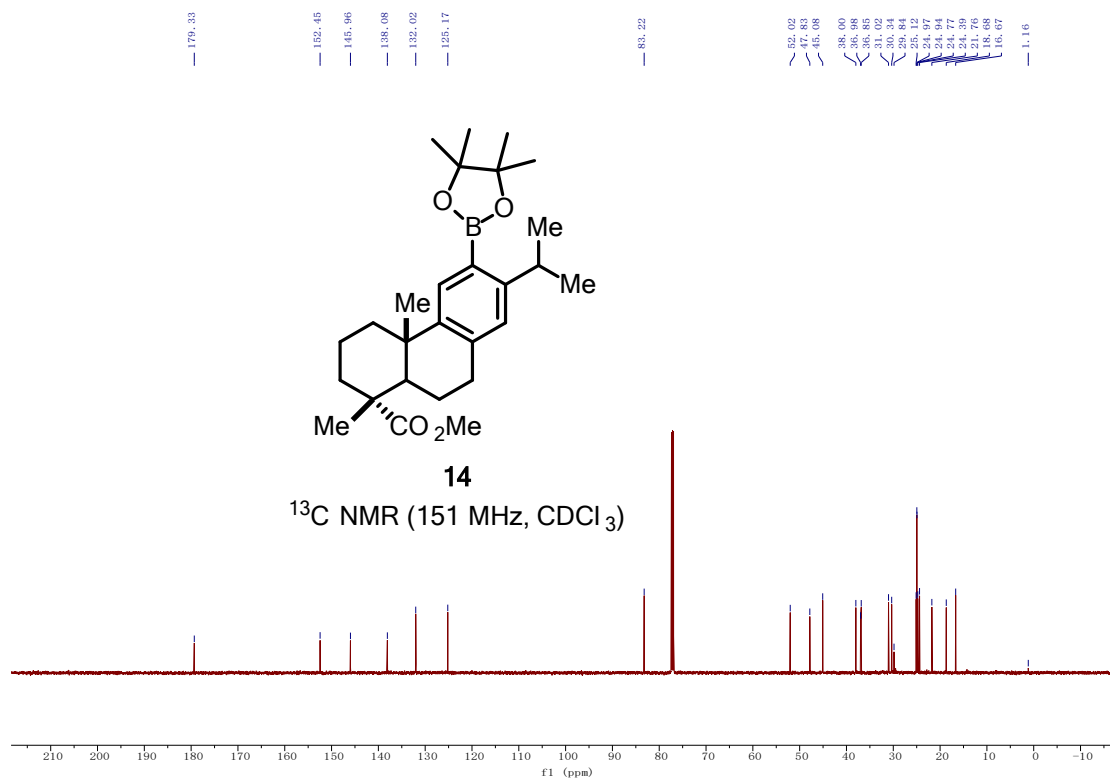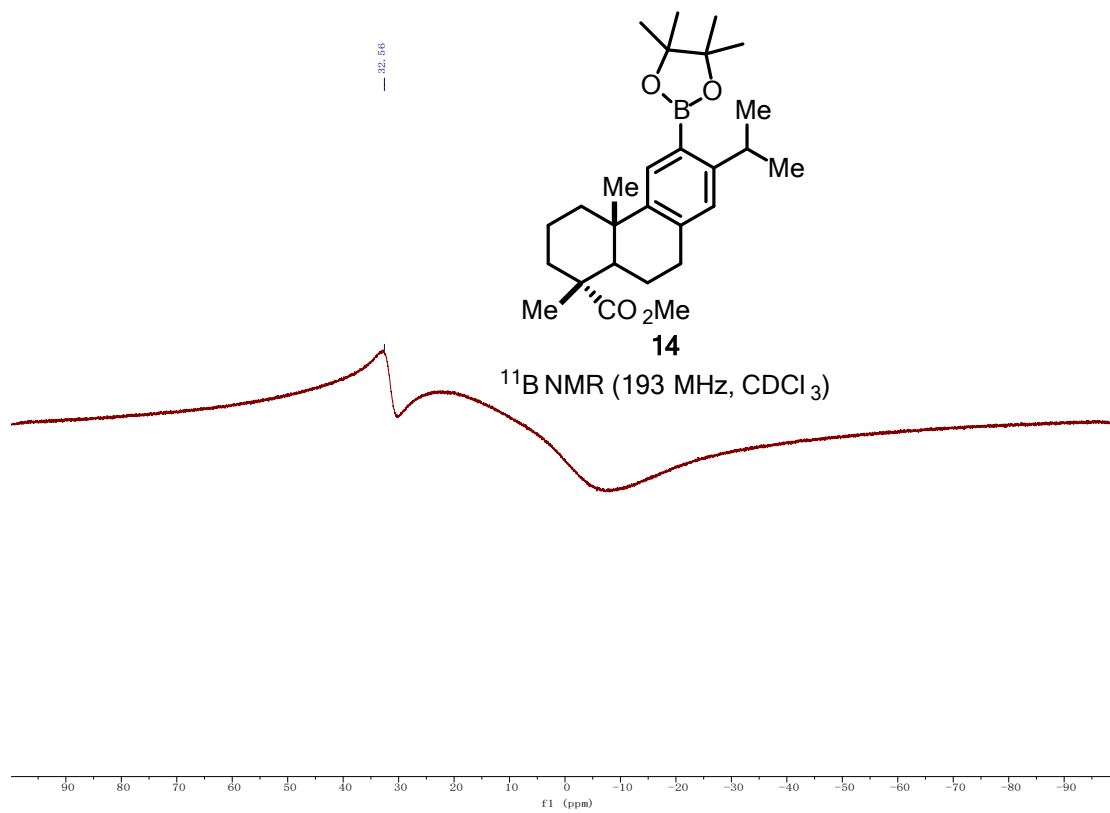

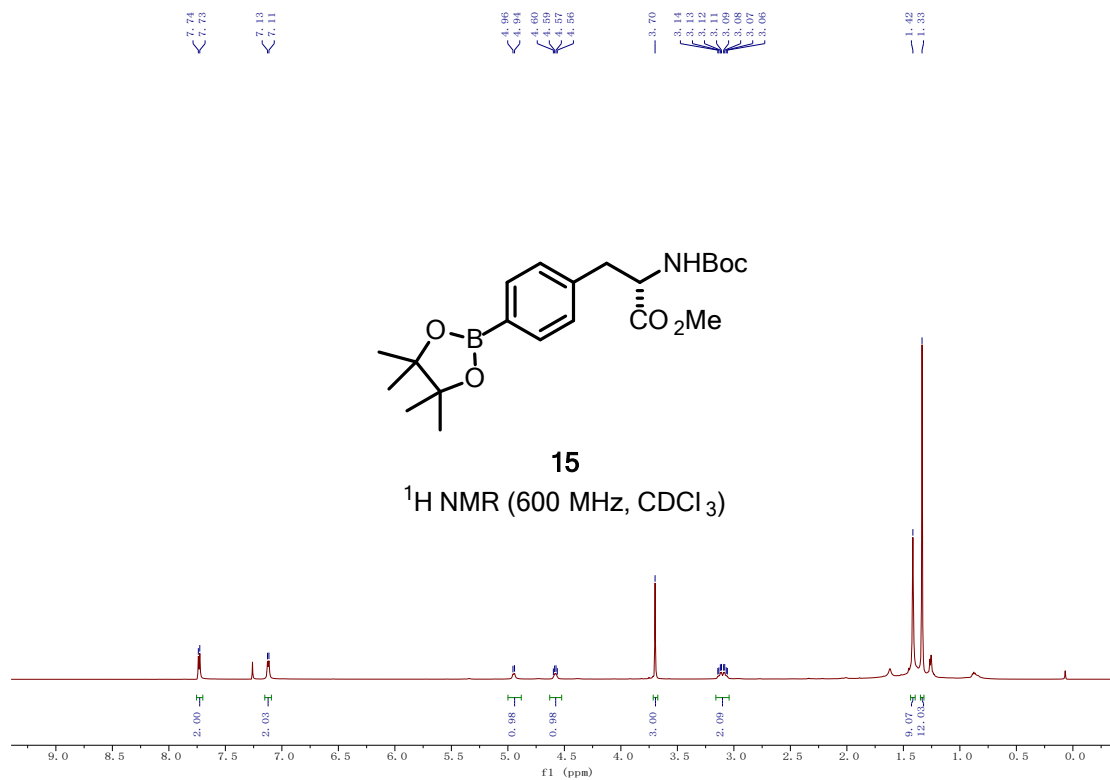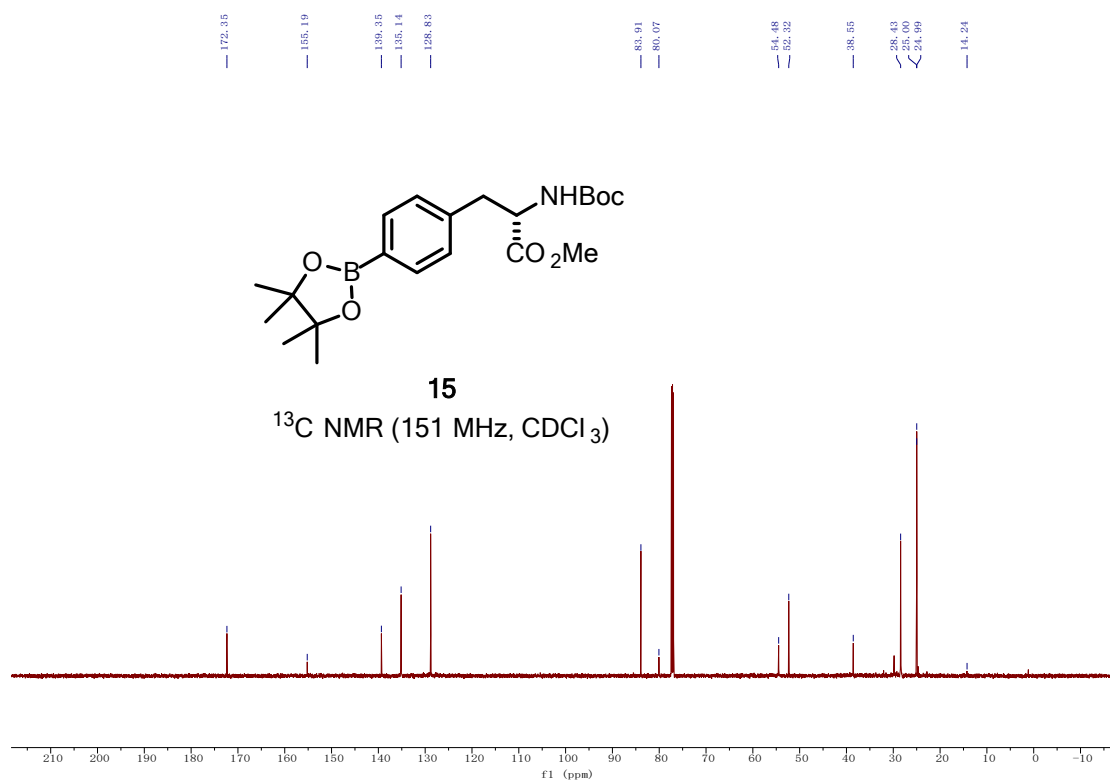

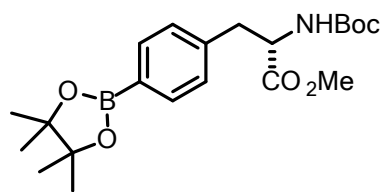

15

$^{11}\text{B}$  NMR (193 MHz,  $\text{CDCl}_3$ )

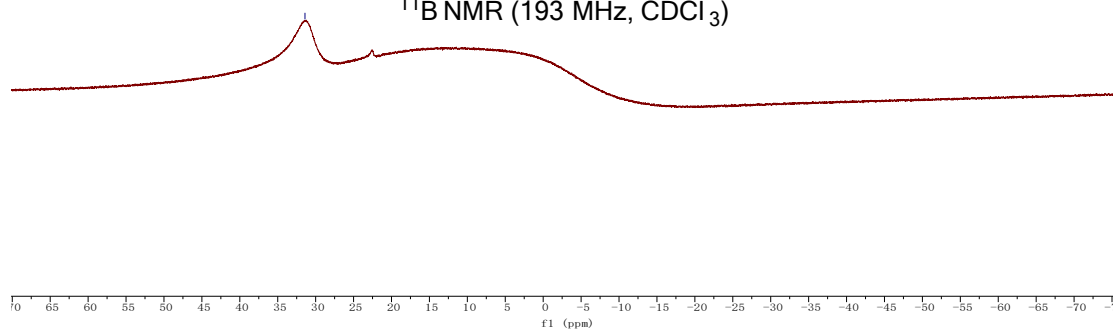

7.58  
7.48  
7.42  
7.30  
7.29  
7.28  
7.23  
7.22  
7.22  
7.22  
7.20

6.58  
6.57

5.22  
5.20

3.41

2.83

2.33  
2.22  
2.21  
2.17  
2.13  
2.11  
2.09  
2.08

1.43  
1.42  
1.39  
1.37  
1.36  
1.30  
1.29

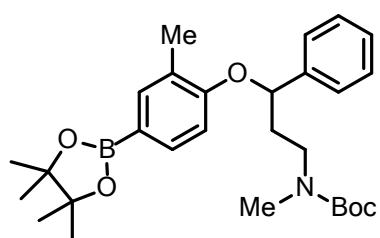

16

$^1\text{H}$  NMR (600 MHz,  $\text{CDCl}_3$ )

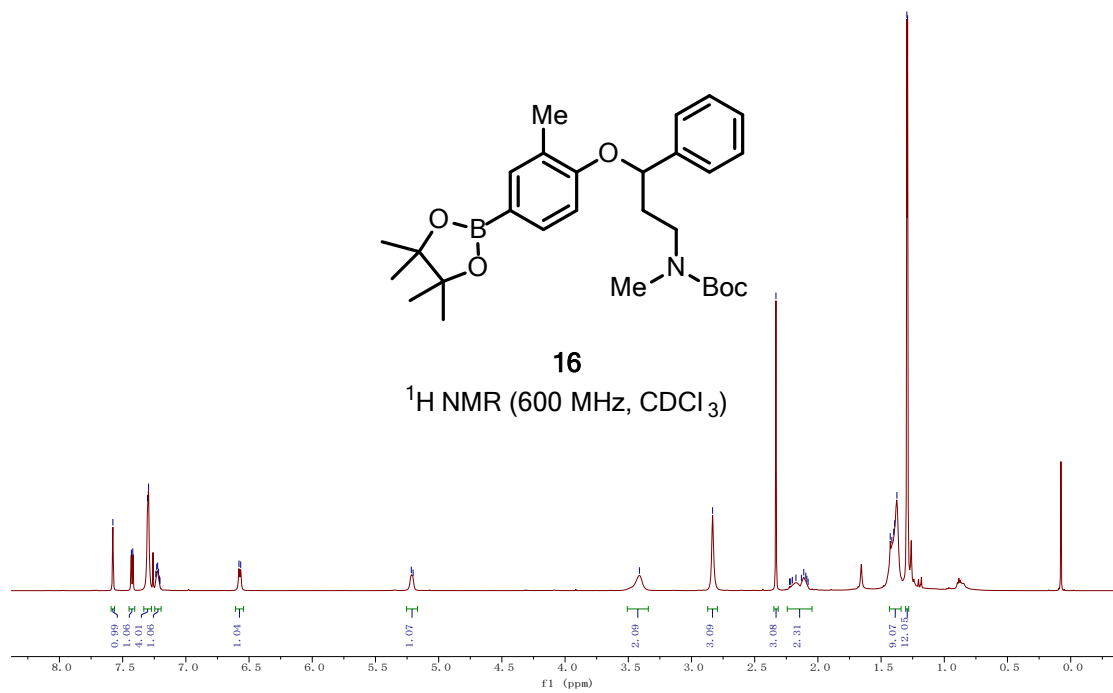

0.99  
1.06  
1.01  
1.06

1.04

1.07

2.09

3.09

3.08  
2.31

9.07  
12.04

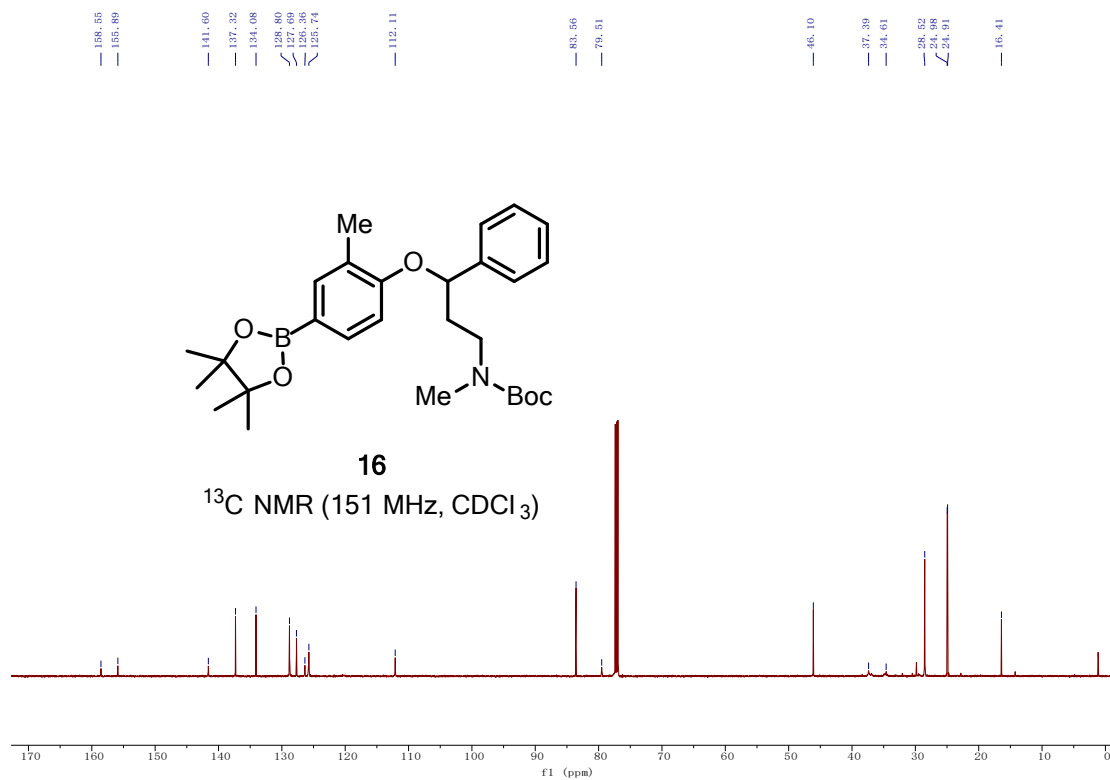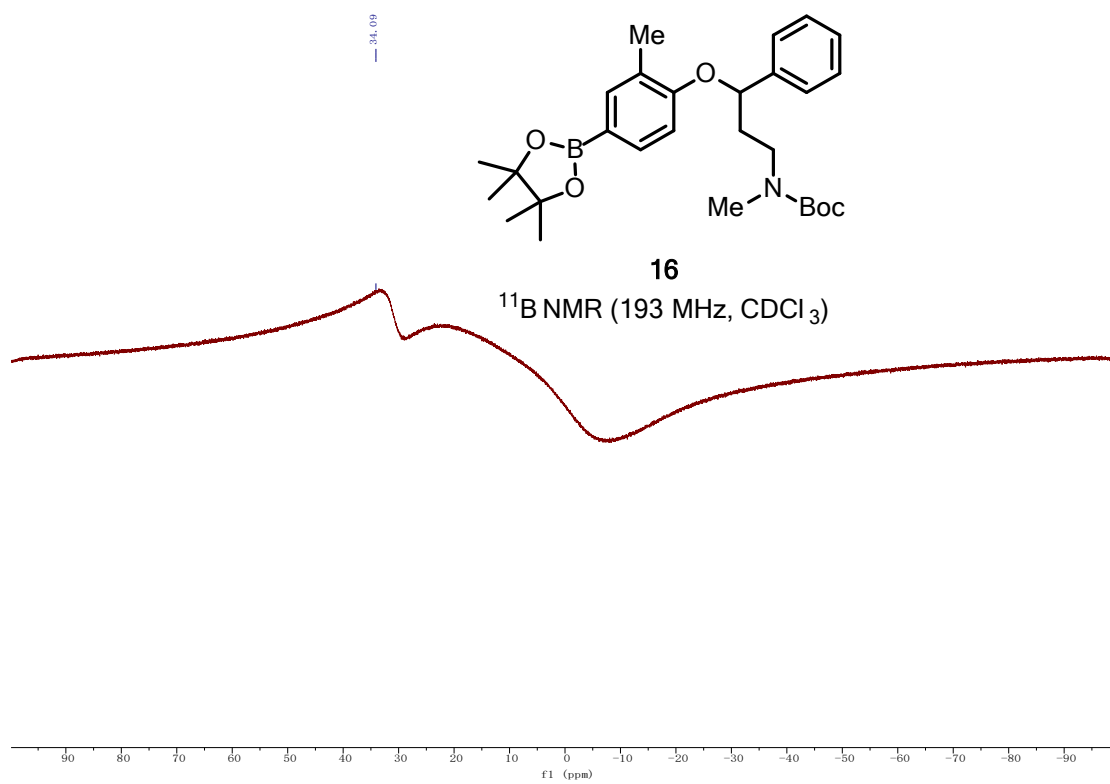



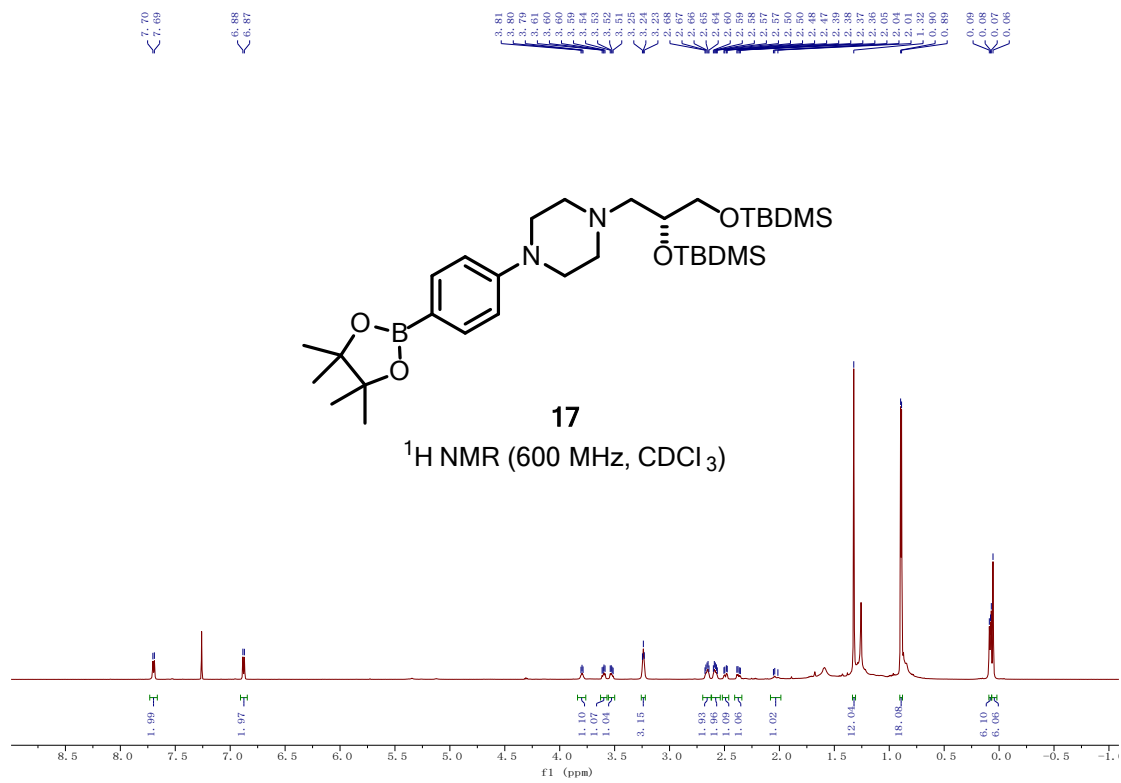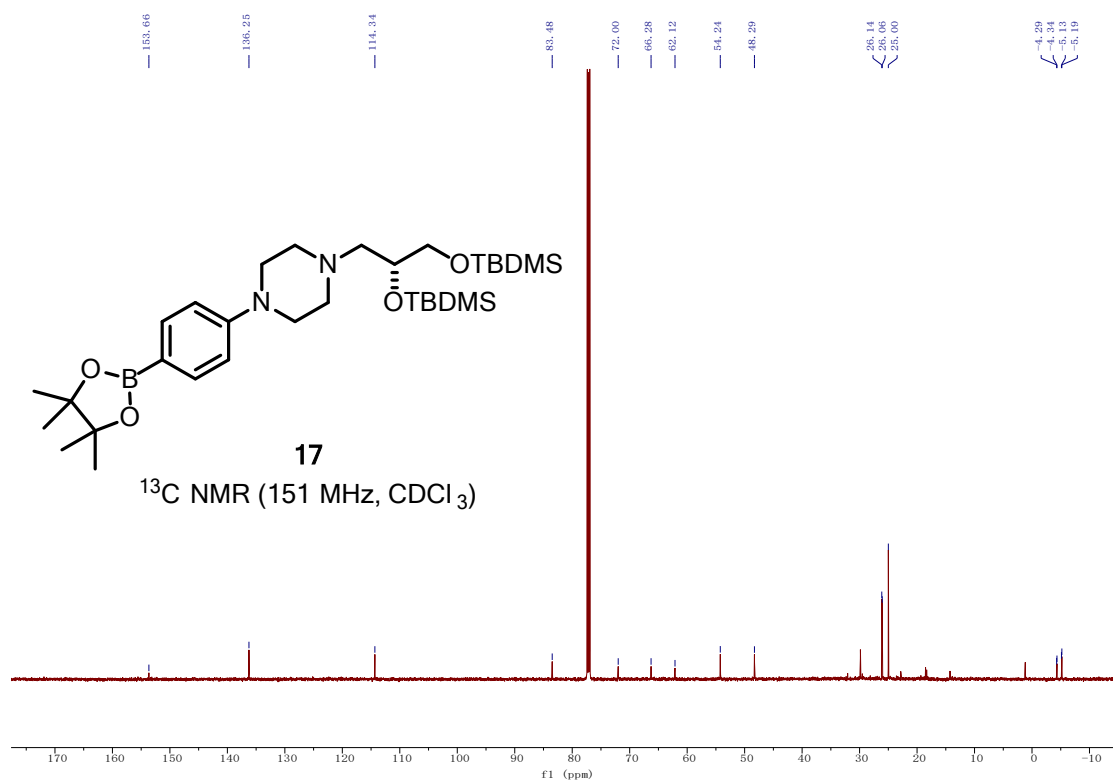

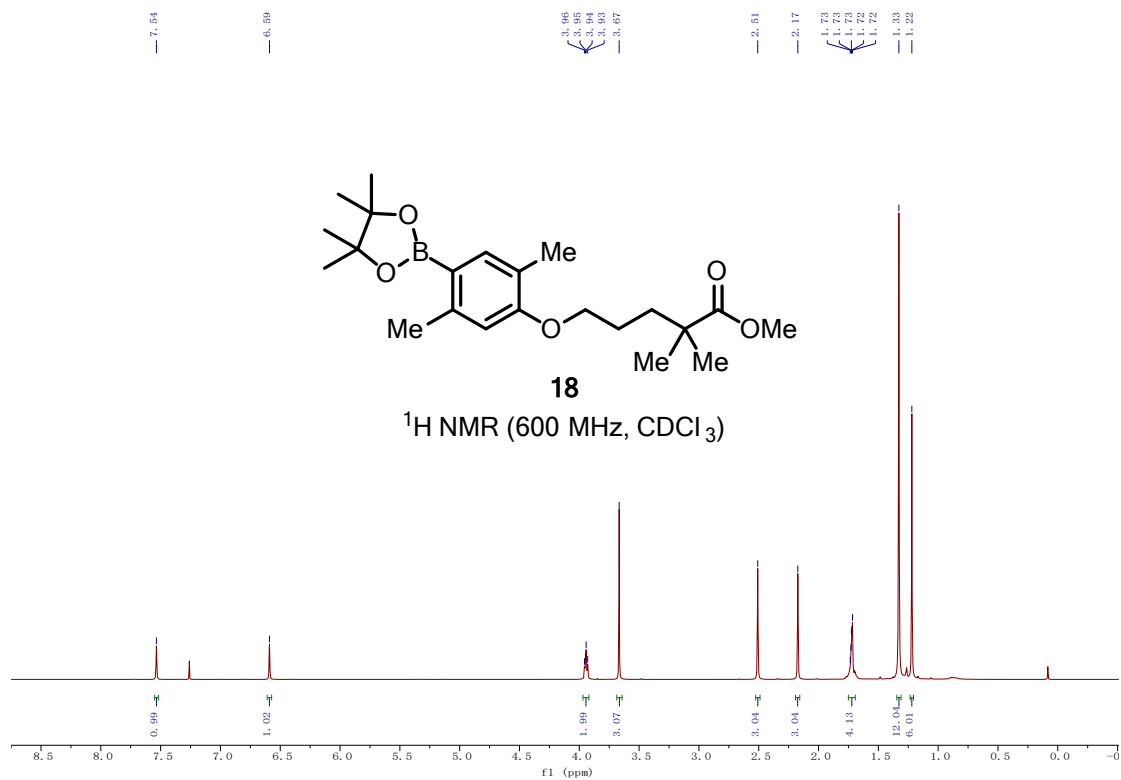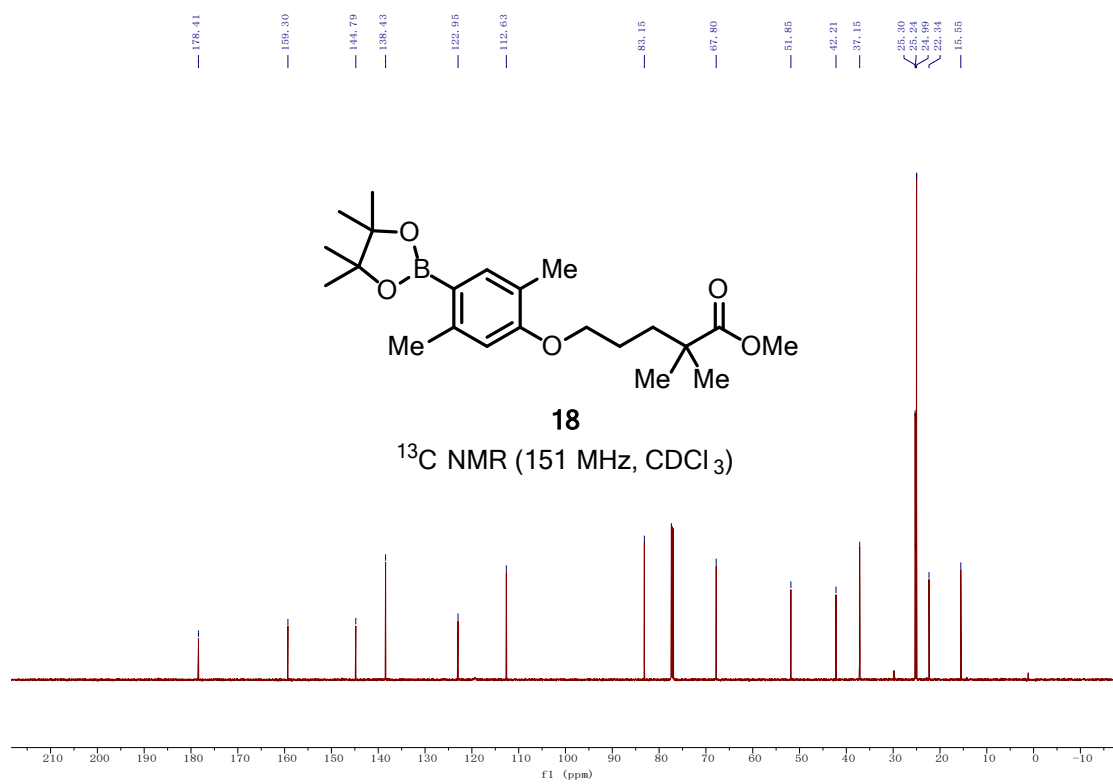

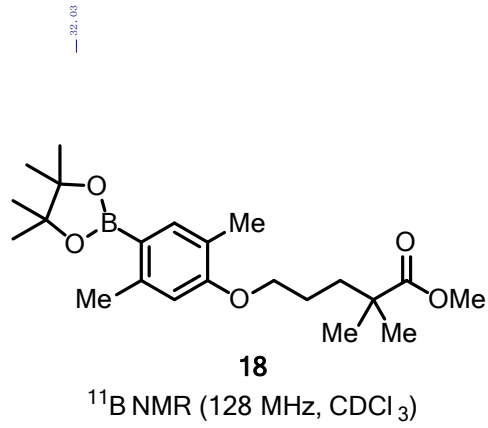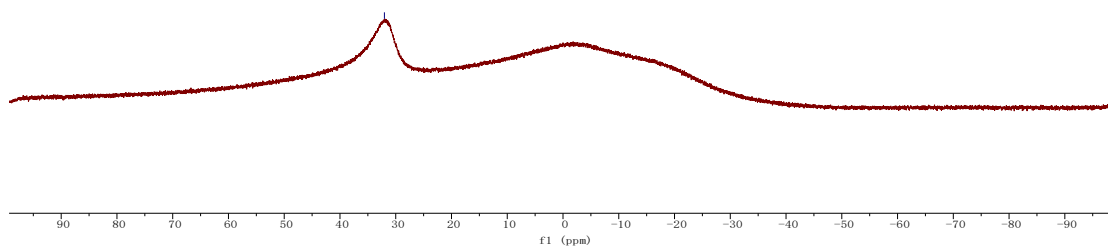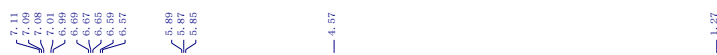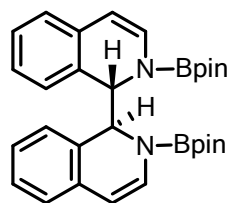

**dimer A**  
<sup>1</sup>H NMR (400 MHz, CDCl<sub>3</sub>)

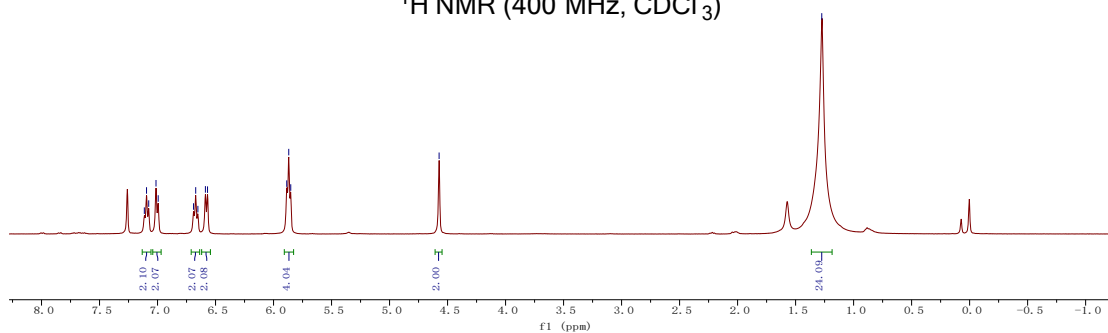

132.41  
131.16  
128.00  
127.38  
124.17  
122.92

106.02

83.35

56.21

25.59  
24.70

w

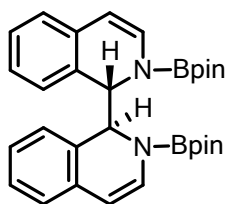

dimer A

$^{13}\text{C}$  NMR (101 MHz,  $\text{CDCl}_3$ )

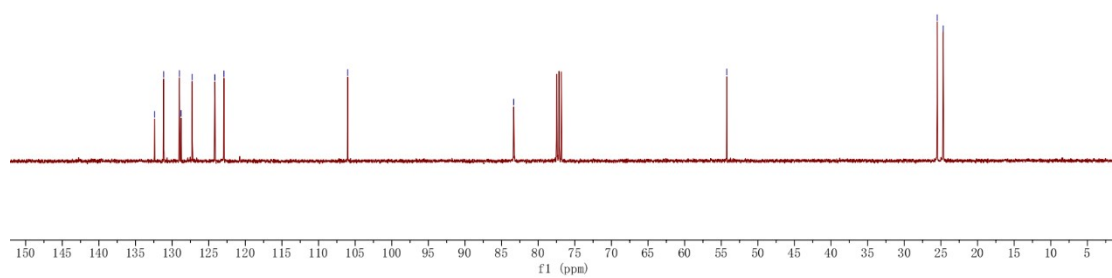

Supplement: d2sc00552b1.pdf [file d2sc00552b1.pdf]
